# Supplementary material for: Iodine-mediated oxythiolation of o-vinylanilides with disulfides for the synthesis of benzoxazines
Source: Royal Society of Chemistry journal article supplement (doi:10.1039/d2ra01078j), 2022-01-01

## Supporting Information

# Iodine-mediated oxythiolation of o-vinylanilides with disulfides for the synthesis of benzoxazines

Yu Yang, ‡<sup>a,b</sup> Liyan Liu, ‡<sup>b</sup> Kuiliang Li, <sup>b</sup> Zhenggen Zha, <sup>b</sup> Qi Sun, \*<sup>b</sup> and Zhiyong Wang \*<sup>b</sup>

<sup>a</sup> School of Chemistry and Chemical Engineering, Hefei Normal University, Hefei, 230601, China.

<sup>b</sup> Hefei National Laboratory for Physical Sciences at Microscale, CAS Key Laboratory of Soft Matter Chemistry and Department of Chemistry, University of Science and Technology of China, Hefei, Anhui, 230026, P. R. China

E-mail: zwang3@ustc.edu.cn.

## Contents

|                                              |    |
|----------------------------------------------|----|
| 1. General Information                       | 1  |
| 2. General Procedures of this transformation | 2  |
| 3. Control Experiment                        | 4  |
| 4. Characterization Data for the Products    | 5  |
| 5. DFT calculations                          | 19 |
| 6. Reference                                 | 35 |
| 7. NMR Spectra of Product                    | 37 |

### 1. General Information

Unless otherwise indicated, all commercial reagents were used without additional purification. All Substances were synthesized according to the previous literature.<sup>1</sup> <sup>1</sup>H NMR, <sup>19</sup>F NMR and <sup>13</sup>C NMR were recorded on a Bruker-400 MHz Spectrometer (<sup>1</sup>H NMR: 400 MHz, <sup>19</sup>F NMR: 376 MHz, <sup>13</sup>C NMR: 100 MHz). All chemical shifts ( $\delta$ ) were reported in ppm and coupling constants ( $J$ ) in Hz. All chemical shifts were reported relative to tetramethylsilane (0 ppm for <sup>1</sup>H), and CDCl<sub>3</sub> (77 ppm for <sup>13</sup>C), respectively. HRMS (ESI) were recorded on a Water TM Q-TOF Premier Mass Spectrometer.

## 2. General Procedures of this transformation

### 2.1 Optimization of reaction conditions

**Table 1.** Optimization of the reaction conditions<sup>a</sup>.

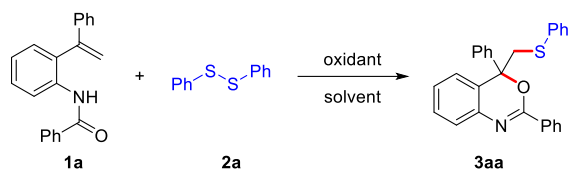

| Entry           | Oxidant        | Solvent                                 | Temp.(°C) | Yield (%) <sup>b</sup> |
|-----------------|----------------|-----------------------------------------|-----------|------------------------|
| 1               | I <sub>2</sub> | DCE                                     | 50        | 57                     |
| 2               | PIDA           | DCE                                     | 50        | n.d. <sup>c</sup>      |
| 3               | PIFA           | DCE                                     | 50        | n.d.                   |
| 4               | I <sub>2</sub> | DMSO                                    | 50        | n.d.                   |
| 5               | I <sub>2</sub> | DMF                                     | 50        | n.d.                   |
| 6               | I <sub>2</sub> | CH <sub>3</sub> CN                      | 50        | 63                     |
| 7               | I <sub>2</sub> | 1,4-dioxane                             | 50        | 35                     |
| 8               | I <sub>2</sub> | EtOH                                    | 50        | <5                     |
| 9               | I <sub>2</sub> | MeOH                                    | 50        | <5                     |
| 10              | I <sub>2</sub> | toluene                                 | 50        | <5                     |
| 11              | I <sub>2</sub> | PhCl                                    | 50        | <5                     |
| 12              | I <sub>2</sub> | H <sub>2</sub> O                        | 50        | <5                     |
| 13              | I <sub>2</sub> | CH <sub>3</sub> CN/H <sub>2</sub> O=2:1 | 50        | 46                     |
| 14              | I <sub>2</sub> | CH <sub>3</sub> CN/H <sub>2</sub> O=1:1 | 50        | 38                     |
| 15              | I <sub>2</sub> | CH <sub>3</sub> CN/H <sub>2</sub> O=1:2 | 50        | 25                     |
| 16 <sup>d</sup> | I <sub>2</sub> | CH <sub>3</sub> CN                      | 50        | 27                     |
| 17 <sup>e</sup> | I <sub>2</sub> | CH <sub>3</sub> CN                      | 50        | 45                     |
| 18 <sup>f</sup> | I <sub>2</sub> | CH <sub>3</sub> CN                      | 50        | 81                     |
| 19 <sup>g</sup> | I <sub>2</sub> | CH <sub>3</sub> CN                      | 50        | 81                     |
| 20 <sup>f</sup> | I <sub>2</sub> | CH <sub>3</sub> CN                      | 60        | 87                     |
| 21 <sup>f</sup> | I <sub>2</sub> | CH <sub>3</sub> CN                      | 70        | 72                     |
| 22 <sup>f</sup> | I <sub>2</sub> | CH <sub>3</sub> CN                      | 80        | 60                     |
| 22 <sup>h</sup> | I <sub>2</sub> | CH <sub>3</sub> CN                      | 60        | <5                     |
| 23 <sup>i</sup> | I <sub>2</sub> | CH <sub>3</sub> CN                      | 60        | <5                     |

|                 |                |                    |    |    |
|-----------------|----------------|--------------------|----|----|
| 24 <sup>j</sup> | I <sub>2</sub> | CH <sub>3</sub> CN | 60 | <5 |
| 25 <sup>k</sup> | I <sub>2</sub> | DCE                | 60 | 64 |

<sup>a</sup> Reaction condition: **1a** (0.2 mmol, 1 equiv), **2a** (0.1 mmol, 0.5 equiv), oxidant (0.2 mmol, 1 equiv), 12 h. <sup>b</sup> Isolated yield. <sup>c</sup> n.d. = not detected. <sup>d</sup> **2a** (0.75 equiv) and I<sub>2</sub> (0.2 equiv) were used. <sup>e</sup> **2a** (0.75 equiv) and I<sub>2</sub> (0.5 equiv) were used. <sup>f</sup> **2a** (0.75 equiv) and I<sub>2</sub> (1.5 equiv) were used. <sup>g</sup> **2a** (1 equiv) and I<sub>2</sub> (2 equiv) were used. <sup>h</sup> 0.04 (0.2 equiv) mmol I<sub>2</sub> was used as catalyst and 0.6 mmol (3 equiv) TBHP was used as oxidant. <sup>i</sup> 0.04 (0.2 equiv) mmol I<sub>2</sub> was used as catalyst and 0.6 mmol (3 equiv) H<sub>2</sub>O<sub>2</sub> was used as oxidant. <sup>j</sup> 0.04 (0.2 equiv) mmol I<sub>2</sub> was used as catalyst and 0.6 mmol (3 equiv) K<sub>2</sub>S<sub>2</sub>O<sub>4</sub> was used as oxidant. <sup>k</sup> I<sub>2</sub> (1.5 equiv) were used.

**Table 2.** Optimization of the reaction time<sup>a</sup>.

| Reaction time (h) | Yield (%) |
|-------------------|-----------|
| 0.5               | 9         |
| 1                 | 25        |
| 2                 | 47        |
| 4                 | 65        |
| 6                 | 72        |
| 8                 | 78        |
| 10                | 84        |
| 12                | 87        |
| 18                | 87        |
| 24                | 87        |

<sup>a</sup> Reaction condition: **1** (0.2 mmol), **2a** (0.75 equiv), I<sub>2</sub> (1.5 equiv), in CH<sub>3</sub>CN (2 mL) at 60 °C.

## 2.2 General Procedures of this transformation

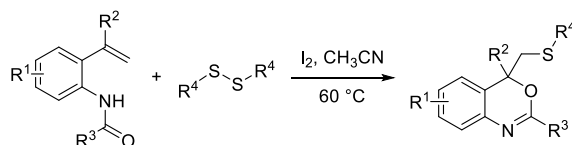

To a 10 mL tube was added *o*-vinylanilide **1** (0.2 mmol), disulfide **2** (0.15 mmol, 0.75 equiv), I<sub>2</sub> (0.3 mmol, 1.5 equiv) and CH<sub>3</sub>CN (2 mL). After heating at 60 °C for 12 hours, the reaction was worked up with saturated Na<sub>2</sub>S<sub>2</sub>O<sub>3</sub> solution and extracted with EtOAc (2 mL × 3). The combined organic phase was

washed with brine and dried over anhydrous  $\text{Na}_2\text{SO}_4$ . After the solvent had been completely removed, the residue was purified by column chromatography on silica gel (petroleum ether/ethyl acetate = 20:1 to 6:1) to give the product **3**.

### 3. Control Experiment

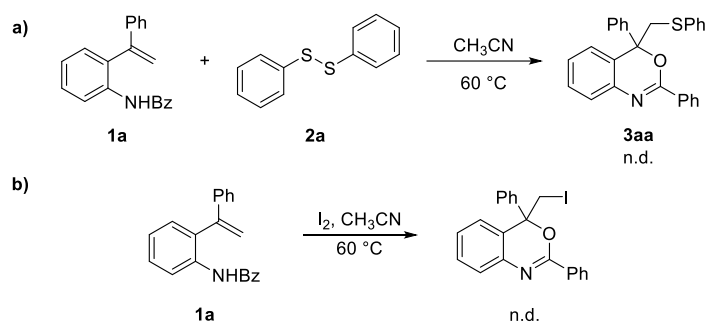

Reaction condition a: **1a** (0.2 mmol, 1 equiv), **2a** (0.2 mmol, 1 equiv),  $\text{CH}_3\text{CN}$  (2 mL), 60 °C, 12 h;

Reaction condition b: **1a** (0.2 mmol, 1 equiv),  $\text{I}_2$  (0.3 mmol, 1.5 equiv),  $\text{CH}_3\text{CN}$  (2 mL), 60 °C, 12 h;

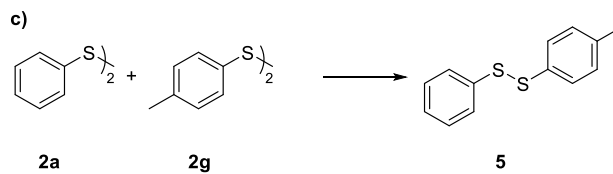

Condition A ( blank ) : 5 %    Condition B ( $\text{I}_2$ ) : 50 %

In the absence of iodine, only a small amount of **2a** and **2g** were transformed into mixed disulfide **5** after 1 h, which may be promoted by light or heat. While in the presence of iodine, half of the disulfide compound is the mixed disulfide **5** after 5 min, indicating that iodine can promote the break and formation of the S-S bond.

## 4. Characterization Data for the Products

### 2,4-diphenyl-4-((phenylthio)methyl)-4H-benzo[d][1,3]oxazine (3aa)

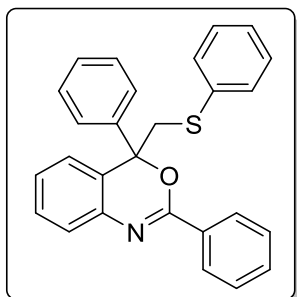

The title compound was prepared according to the general working procedure and purified by column chromatography (PE:EA = 20:1~6:1) to give the product as a colorless oil: 87 % yield (71 mg).  $^1\text{H}$  NMR (400 MHz, Chloroform-*d*)  $\delta$  8.16 – 8.09 (m, 2H), 7.48 – 7.42 (m, 1H), 7.42 – 7.33 (m, 6H), 7.32 – 7.23 (m, 5H), 7.21 – 7.07 (m, 5H), 3.96 (d,  $J$  = 13.9 Hz, 1H), 3.90 (d,  $J$  = 13.9 Hz, 1H).  $^{13}\text{C}$  NMR (101 MHz,  $\text{CDCl}_3$ )  $\delta$  156.1, 141.8, 139.5, 136.7, 132.2, 131.4, 130.3, 129.3, 128.8, 128.3, 128.2, 128.1, 128.0, 126.9, 126.4, 126.3, 126.1, 125.5, 124.8, 83.6, 45.1. HRMS (ESI)  $m/z$  calcd for.  $\text{C}_{27}\text{H}_{22}\text{NOS}$   $[\text{M}+\text{H}]^+$  408.1417, found 408.1435.

### 6-fluoro-2,4-diphenyl-4-((phenylthio)methyl)-4H-benzo[d][1,3]oxazine (3ba)

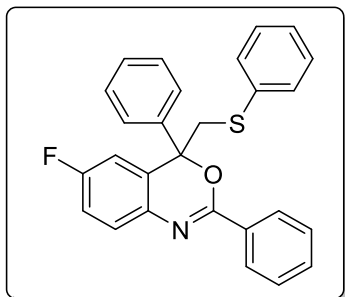

The title compound was prepared according to the general working procedure and purified by column chromatography (PE:EA = 20:1~6:1) to give the product as a colorless oil: 81 % yield (69 mg).  $^1\text{H}$  NMR (400 MHz, Chloroform-*d*)  $\delta$  8.15 – 8.04 (m, 2H), 7.49 – 7.42 (m, 1H), 7.42 – 7.35 (m, 4H), 7.35 – 7.25 (m, 6H), 7.19 – 7.08 (m, 3H), 7.06 – 6.99 (m, 1H), 6.82 (dd,  $J$  = 8.7, 2.8 Hz, 1H), 3.89 (s, 2H).  $^{13}\text{C}$  NMR (101 MHz,  $\text{CDCl}_3$ )  $\delta$  161.5 (d,  $J$  = 246.7 Hz), 155.5 (d,  $J$  = 1.88 Hz), 141.3, 136.3, 135.8 (d,  $J$  = 2.78), 132.0, 131.4, 130.5, 128.9, 128.5, 128.4, 128.3, 128.2, 127.9, 127.0 (d,  $J$  = 8.8 Hz), 126.6, 126.0, 116.0

(d,  $J = 22.0$  Hz), 112.0 (d,  $J = 24.8$  Hz), 83.3 (d,  $J = 2.0$  Hz), 45.1.  $^{19}\text{F}$  NMR (376 MHz,  $\text{CDCl}_3$ )  $\delta$  -114.29.

HRMS (ESI)  $m/z$  calcd for  $\text{C}_{27}\text{H}_{21}\text{FNOS}$   $[\text{M}+\text{H}]^+$  426.1323, found 426.1337.

### 6-chloro-2,4-diphenyl-4-((phenylthio)methyl)-4*H*-benzo[*d*][1,3]oxazine (3ca)

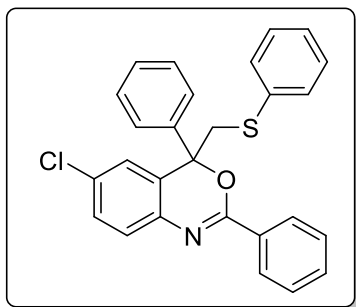

The title compound was prepared according to the general working procedure and purified by column chromatography (PE:EA = 20:1~6:1) to give the product as a colorless oil: 83 % yield (73 mg).  $^1\text{H}$  NMR (400 MHz, Chloroform-*d*)  $\delta$  8.15 – 8.05 (m, 2H), 7.51 – 7.43 (m, 1H), 7.43 – 7.35 (m, 4H), 7.33 – 7.24 (m, 7H), 7.20 – 7.09 (m, 3H), 7.06 – 7.05 (m, 1H), 3.89 (s, 2H).  $^{13}\text{C}$  NMR (101 MHz,  $\text{CDCl}_3$ )  $\delta$  156.3, 141.2, 138.2, 136.2, 131.8, 131.6, 131.4, 130.6, 129.3, 128.9, 128.5, 128.3, 128.2, 128.0, 126.8, 126.6, 126.0, 125.0, 83.5, 45.2. HRMS (ESI)  $m/z$  calcd for  $\text{C}_{27}\text{H}_{21}\text{ClNOS}$   $[\text{M}+\text{H}]^+$  442.1027, found 442.1036.

### 6-bromo-2,4-diphenyl-4-((phenylthio)methyl)-4*H*-benzo[*d*][1,3]oxazine (3da)

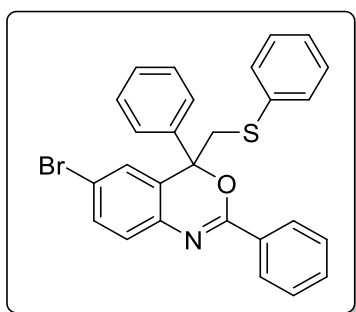

The title compound was prepared according to the general working procedure and purified by column chromatography (PE:EA = 20:1~6:1) to give the product as a colorless oil: 85 % yield (82 mg).  $^1\text{H}$  NMR (400 MHz, Chloroform-*d*)  $\delta$  8.11 – 8.09 (m, 2H), 7.49 – 7.47 (m, 1H), 7.46 (dd,  $J = 8.4, 2.2$  Hz, 1H), 7.44 – 7.40 (m, 4H), 7.39 – 7.30 (m, 5H), 7.28 (d,  $J = 7.5$  Hz, 1H), 7.25 – 7.13 (m, 4H), 3.90 (s, 2H).  $^{13}\text{C}$  NMR (101 MHz,  $\text{CDCl}_3$ )  $\delta$  156.5, 141.2, 138.6, 136.2, 132.4, 131.8, 131.7, 130.7, 128.9, 128.7, 128.6,

128.3, 128.1, 127.9, 127.1, 126.7, 126.0, 119.3, 83.5, 45.3. HRMS (ESI)  $m/z$  calcd for  $C_{27}H_{21}BrNOS$   $[M+H]^+$  486.0522, found 486.0525.

**6-nitro-2,4-diphenyl-4-((phenylthio)methyl)-4H-benzo[d][1,3]oxazine (3ea)**

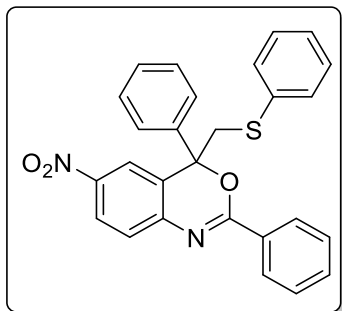

The title compound was prepared according to the general working procedure and purified by column chromatography (PE:EA = 20:1~6:1) to give the product as a colorless oil: 70 % yield (63 mg).  $^1H$  NMR (400 MHz,  $CDCl_3$ )  $\delta$  8.10 (d,  $J = 7.6$  Hz, 2H), 7.47 (t,  $J = 7.2$  Hz, 1H), 7.43 – 7.32 (m, 6H), 7.31 – 7.10 (m, 9H), 3.93 (d,  $J = 13.9$  Hz, 1H), 3.84 (d,  $J = 13.9$  Hz, 1H).  $^{13}C$  NMR (101 MHz,  $CDCl_3$ )  $\delta$  156.0, 140.9, 139.5, 136.5, 132.1, 131.6, 131.5, 130.5, 129.6, 129.0, 128.4, 128.1, 126.7, 126.6, 125.8, 124.7, 122.6, 83.2, 45.0. HRMS (ESI)  $m/z$  calcd for  $C_{27}H_{21}N_2O_3S$   $[M+H]^+$  453.1268, found 453.1602.

**6-methoxy-2,4-diphenyl-4-((phenylthio)methyl)-4H-benzo[d][1,3]oxazine (3fa)**

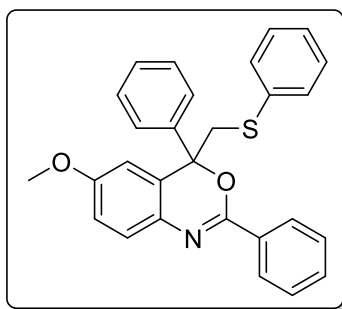

The title compound was prepared according to the general working procedure and purified by column chromatography (PE:EA = 20:1~6:1) to give the product as a colorless oil: 90 % yield (78 mg).  $^1H$  NMR (400 MHz, Chloroform-*d*)  $\delta$  8.18 – 8.02 (m, 2H), 7.46 – 7.34 (m, 5H), 7.33 – 7.20 (m, 6H), 7.19 – 7.12 (m, 2H), 7.12 – 7.06 (m, 1H), 6.92 – 6.82 (m, 1H), 6.67 (dd,  $J = 2.8, 1.0$  Hz, 1H), 3.96 – 3.86 (m, 2H), 3.73 (s, 3H).  $^{13}C$  NMR (101 MHz,  $CDCl_3$ )  $\delta$  158.0, 154.4, 141.7, 136.7, 133.1, 132.3, 131.0, 130.3, 128.8,

128.3, 128.2, 128.1, 128.0, 127.7, 126.6, 126.3, 126.0, 113.6, 111.1, 83.4, 55.4, 45.1. HRMS (ESI)  $m/z$  calcd for  $C_{28}H_{24}NO_2S$   $[M+H]^+$  438.15222, found 426.1543.

**6-methyl-2,4-diphenyl-4-((phenylthio)methyl)-4H-benzo[d][1,3]oxazine (3ga)**

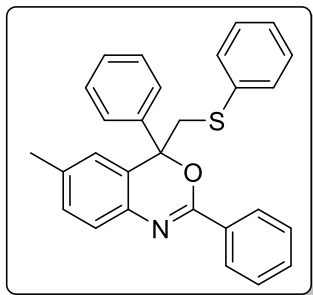

The title compound was prepared according to the general working procedure and purified by column chromatography (PE:EA = 20:1~6:1) to give the product as a colorless oil: 95 % yield (80 mg).  $^1H$  NMR (400 MHz, Chloroform- $d$ )  $\delta$  8.17 – 8.05 (m, 2H), 7.47 – 7.34 (m, 5H), 7.33 – 7.20 (m, 6H), 7.19 – 7.05 (m, 4H), 6.89 (d,  $J$  = 1.9 Hz, 1H), 3.94 (d,  $J$  = 13.9 Hz, 1H), 3.89 (d,  $J$  = 13.9 Hz, 1H), 2.30 (s, 3H).  $^{13}C$  NMR (101 MHz,  $CDCl_3$ )  $\delta$  155.4, 142.0, 137.1, 136.8, 136.2, 132.3, 131.2, 130.3, 129.9, 128.8, 128.3, 128.2, 128.1, 127.8, 126.6, 126.3, 126.3, 126.1, 125.3, 83.6, 45.2, 21.4. HRMS (ESI)  $m/z$  calcd for  $C_{28}H_{24}NOS$   $[M+H]^+$  442.1573, found 442.1598.

**6-butyl-2,4-diphenyl-4-((phenylthio)methyl)-4H-benzo[d][1,3]oxazine (3ha)**

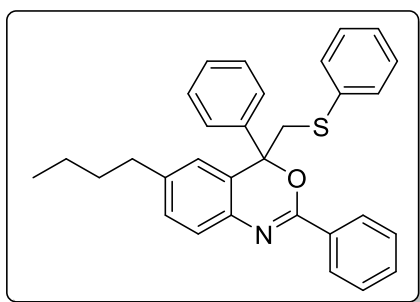

The title compound was prepared according to the general working procedure and purified by column chromatography (PE:EA = 20:1~6:1) to give the product as a yellow oil: 94 % yield (87 mg).  $^1H$  NMR (400 MHz, Chloroform- $d$ )  $\delta$  8.07 – 7.97 (m, 2H), 7.39 – 7.33 (m, 1H), 7.33 – 7.27 (m, 4H), 7.23 – 7.13 (m, 6H), 7.11 – 7.05 (m, 3H), 7.05 – 6.99 (m, 1H), 6.84 (s, 1H), 3.88 (d,  $J$  = 13.8 Hz, 1H), 3.82 (d,  $J$  = 12.8 Hz, 1H), 2.49 (t,  $J$  = 7.8 Hz, 2H), 1.55 – 1.42 (m, 2H), 1.31- 1.20 (m, 2H), 0.83 (t,  $J$  = 7.3 Hz, 3H).



$^{13}\text{C}$  NMR (101 MHz,  $\text{CDCl}_3$ )  $\delta$  155.4, 142.0, 141.3, 137.3, 136.9, 132.4, 131.1, 130.3, 129.2, 128.8, 128.3, 128.2, 128.1, 127.9, 126.5, 126.3, 126.1, 125.3, 124.7, 82.6, 45.2, 35.5, 33.5, 22.3, 13.9. HRMS (ESI)  $m/z$  calcd for  $\text{C}_{31}\text{H}_{30}\text{NOS}$   $[\text{M}+\text{H}]^+$  464.2043, found 464.2035.

### 6-(tert-butyl)-2,4-diphenyl-4-((phenylthio)methyl)-4H-benzo[d][1,3]oxazine (3ia)

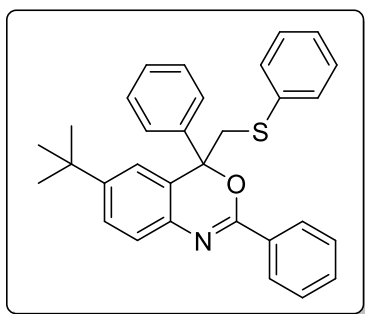

The title compound was prepared according to the general working procedure and purified by column chromatography (PE:EA = 20:1~6:1) to give the product as a colorless oil: 80 % yield (74 mg).  $^1\text{H}$  NMR (400 MHz, Chloroform- $d$ )  $\delta$  8.12 (d,  $J$  = 6.7 Hz, 2H), 7.45 – 7.41 (m, 1H), 7.41 – 7.35 (m, 5H), 7.33 – 7.23 (m, 6H), 7.19 – 7.12 (m, 3H), 7.12 – 7.05 (m, 1H), 3.98 (d,  $J$  = 13.8 Hz, 1H), 3.94 (s, 1H), 1.28 (s, 9H).  $^{13}\text{C}$  NMR (101 MHz,  $\text{CDCl}_3$ ) 155.6, 149.5, 142.0, 137.1, 136.9, 132.4, 131.2, 130.3, 128.8, 128.3, 128.2, 128.1, 127.9, 126.3, 126.2, 126.1, 126.0, 125.0, 121.7, 83.8, 45.25, 34.7, 31.3. HRMS (ESI)  $m/z$  calcd for  $\text{C}_{31}\text{H}_{30}\text{NOS}$   $[\text{M}+\text{H}]^+$  464.2043, found 464.2035.

### 8-methyl-2,4-diphenyl-4-((phenylthio)methyl)-4H-benzo[d][1,3]oxazine (3ja)

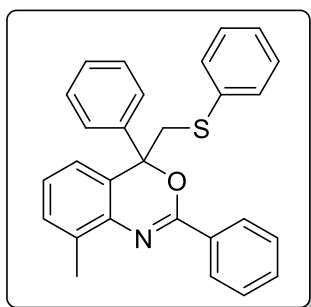

The title compound was prepared according to the general working procedure and purified by column chromatography (PE:EA = 20:1~6:1) to give the product as a colorless oil: 96 % yield (81 mg).  $^1\text{H}$  NMR (400 MHz, Chloroform- $d$ )  $\delta$  8.16 (d,  $J$  = 8.2, 1.5 Hz, 2H), 7.50 – 7.44 (m, 1H), 7.43 – 7.37 (m, 4H), 7.34 – 7.29 (m, 2H), 7.29 – 7.21 (m, 4H), 7.19 (t,  $J$  = 7.6 Hz, 2H), 7.15 – 7.08 (m, 2H), 7.01 (d,  $J$  = 7.6 Hz,

1H), 3.96 (d,  $J = 13.8$  Hz, 1H), 3.89 (d,  $J = 13.8$  Hz, 1H), 2.53 (s, 3H).  $^{13}\text{C}$  NMR (101 MHz,  $\text{CDCl}_3$ )  $\delta$  155.0, 142.0, 137.7, 136.9, 134.1, 132.6, 131.2, 130.6, 130.2, 128.8, 128.3, 128.2, 128.0, 126.8, 126.3, 126.1, 125.7, 122.3, 83.5, 45.1, 17.2. HRMS (ESI)  $m/z$  calcd for  $\text{C}_{28}\text{H}_{24}\text{NOS}$   $[\text{M}+\text{H}]^+$  442.1573, found 442.1598.

#### 4-(4-fluorophenyl)-2-phenyl-4-((phenylthio)methyl)-4H-benzo[d][1,3]oxazine (3ka)

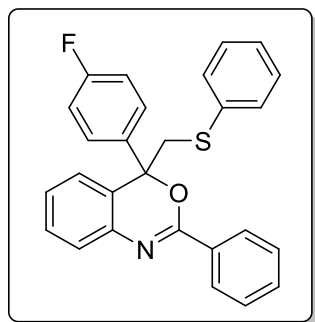

The title compound was prepared according to the general working procedure and purified by column chromatography (PE:EA = 20:1~6:1) to give the product as a colorless oil: 83 % yield (70 mg).  $^1\text{H}$  NMR (400 MHz, Chloroform- $d$ )  $\delta$  8.10 (d,  $J = 7.8$  Hz, 2H), 7.46 (d,  $J = 7.3$  Hz, 1H), 7.43 – 7.32 (m, 6H), 7.29 (d,  $J = 7.5$  Hz, 2H), 7.23 – 7.10 (m, 5H), 6.95 (t,  $J = 8.6$  Hz, 2H), 3.94 (d,  $J = 13.9$  Hz, 1H), 3.87 (d,  $J = 13.9$  Hz, 1H).  $^{13}\text{C}$  NMR (101 MHz,  $\text{CDCl}_3$ )  $\delta$  162.4(d,  $J = 248.9$  Hz), 156.01, 139.40, 137.60 (d,  $J = 3.1$  Hz), 136.45, 132.03, 131.50, 130.34, 129.44, 128.86, 128.23, 128.14, 128.05, 127.95, 126.76, 126.49, 125.59, 124.63, 115.2 (d,  $J = 21.6$  Hz), 83.10, 45.11.  $^{19}\text{F}$  NMR (376 MHz,  $\text{CDCl}_3$ )  $\delta$  -113.62. HRMS (ESI)  $m/z$  calcd for  $\text{C}_{27}\text{H}_{21}\text{FNOS}$   $[\text{M}+\text{H}]^+$  426.1323, found 426.1337.

#### 4-(4-chlorophenyl)-2-phenyl-4-((phenylthio)methyl)-4H-benzo[d][1,3]oxazine (3ma)

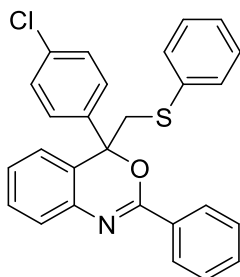

The title compound was prepared according to the general working procedure and purified by column chromatography (PE:EA = 20:1~6:1) to give the product as a colorless oil: 77 % yield (68 mg).  $^1\text{H}$  NMR (400 MHz, Chloroform- $d$ )  $\delta$  8.10 (d,  $J = 7.6$  Hz, 2H), 7.51 – 7.45 (m, 1H), 7.44 – 7.36 (m, 4H), 7.34 –

7.23 (m, 7H), 7.18 (t,  $J = 7.6$  Hz, 2H), 7.13 (t,  $J = 7.3$  Hz, 2H), 3.94 (d,  $J = 13.9$  Hz, 1H), 3.86 (d,  $J = 13.9$  Hz, 1H).  $^{13}\text{C}$  NMR (101 MHz,  $\text{CDCl}_3$ )  $\delta$  156.0, 140.2, 139.3, 136.4, 134.3, 131.9, 131.6, 130.4, 129.5, 128.9, 128.5, 128.3, 128.0, 127.7, 126.6, 126.5, 125.6, 124.6, 83.2, 45.0. HRMS (ESI)  $m/z$  calcd for  $\text{C}_{27}\text{H}_{21}\text{ClNOS}$   $[\text{M}+\text{H}]^+$  442.1027, found 464.0846.

#### 4-(4-bromophenyl)-2-phenyl-4-((phenylthio)methyl)-4H-benzo[d][1,3]oxazine (3na)

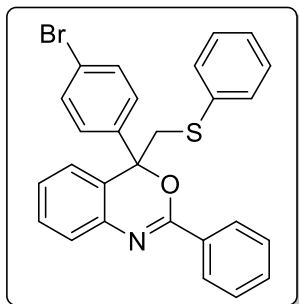

The title compound was prepared according to the general working procedure and purified by column chromatography (PE:EA = 20:1~6:1) to give the product as a colorless oil: 68 % yield (66 mg).  $^1\text{H}$  NMR (400 MHz, Chloroform- $d$ )  $\delta$  8.19 – 8.08 (m, 3H), 7.94 (s, 1H), 7.52 (t,  $J = 7.4$  Hz, 1H), 7.46 – 7.38 (m, 3H), 7.38 – 7.28 (m, 5H), 7.27 – 7.22 (m, 2H), 7.17 – 7.07 (m, 3H), 3.97 (s, 2H).  $^{13}\text{C}$  NMR (101 MHz,  $\text{CDCl}_3$ )  $\delta$  158.9, 145.4, 145.2, 141.0, 135.6, 132.5, 131.2, 130.9, 128.9, 128.9, 128.8, 128.5, 128.4, 127.2, 126.9, 126.0, 125.7, 124.9, 121.2, 84.2, 45.6. HRMS (ESI)  $m/z$  calcd for  $\text{C}_{27}\text{H}_{21}\text{BrNOS}$   $[\text{M}+\text{H}]^+$  486.0522, found 486.0525.

#### 2-phenyl-4-((phenylthio)methyl)-4-(p-tolyl)-4H-benzo[d][1,3]oxazine (3oa)

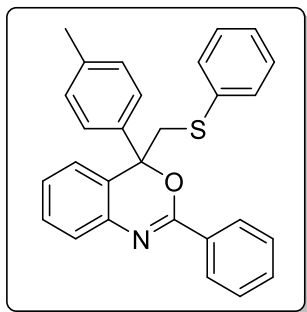

The title compound was prepared according to the general working procedure and purified by column chromatography (PE:EA = 20:1~6:1) to give the product as a colorless oil: 72 % yield (61 mg).  $^1\text{H}$  NMR (400 MHz, Chloroform- $d$ )  $\delta$  8.11 (d,  $J = 8.1$  Hz, 2H), 7.47 – 7.41 (m, 1H), 7.41 – 7.32 (m, 4H), 7.30 –

7.25 (m, 4H), 7.22 – 7.04 (m, 7H), 3.94 (d,  $J = 13.9$  Hz, 1H), 3.89 (d,  $J = 13.9$  Hz, 1H), 2.27 (s, 3H).  $^{13}\text{C}$  NMR (101 MHz,  $\text{CDCl}_3$ )  $\delta$  156.2, 139.5, 139.0, 138.1, 136.7, 132.2, 131.3, 130.2, 129.2, 129.0, 128.8, 128.1, 128.0, 127.1, 126.3, 126.3, 126.0, 125.4, 124.8, 83.5, 45.0, 21.0. HRMS (ESI)  $m/z$  calcd for  $\text{C}_{28}\text{H}_{24}\text{NOS}$   $[\text{M}+\text{H}]^+$  442.1573, found 442.1556.

#### 4-phenyl-4-((phenylthio)methyl)-2-(p-tolyl)-4H-benzo[*d*][1,3]oxazine (3pa)

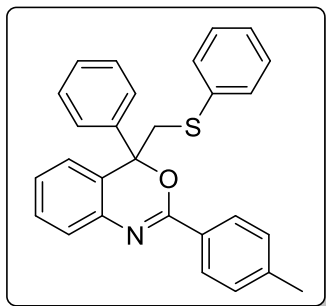

The title compound was prepared according to the general working procedure and purified by column chromatography (PE:EA = 20:1~6:1) to give the product as a colorless oil: 95 % yield (80 mg).  $^1\text{H}$  NMR (400 MHz, Chloroform-*d*)  $\delta$  8.02 (d,  $J = 8.0$  Hz, 2H), 7.38 (d,  $J = 6.8$  Hz, 2H), 7.35 – 7.31 (m, 2H), 7.31 – 7.23 (m, 5H), 7.21 – 7.07 (m, 7H), 3.95 (d,  $J = 13.8$  Hz, 1H), 3.88 (d,  $J = 13.8$  Hz, 1H), 2.37 (s, 3H).  $^{13}\text{C}$  NMR (101 MHz,  $\text{CDCl}_3$ )  $\delta$  156.3, 141.8, 141.7, 139.6, 136.7, 130.2, 129.4, 129.2, 128.9, 128.8, 128.3, 128.2, 128.0, 126.9, 126.3, 126.1, 126.0, 125.3, 124.7, 83.4, 45.0, 21.6. HRMS (ESI)  $m/z$  calcd for  $\text{C}_{28}\text{H}_{24}\text{NOS}$   $[\text{M}+\text{H}]^+$  442.1573, found 442.1598.

#### 2-methyl-4-phenyl-4-((phenylthio)methyl)-4H-benzo[*d*][1,3]oxazine (3qa)

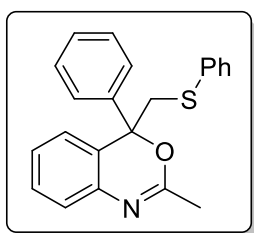

The title compound was prepared according to the general working procedure and purified by column chromatography (PE:EA = 20:1~6:1) to give the product as a colorless oil: 67 % yield (46 mg).  $^1\text{H}$  NMR (400 MHz, Chloroform-*d*)  $\delta$  7.38 – 7.26 (m, 8H), 7.23 (t,  $J = 7.0$  Hz, 2H), 7.20 – 7.11 (m, 3H), 7.01 (d,  $J = 7.6$  Hz, 1H), 3.82 (s, 2H), 2.03 (s, 3H).  $^{13}\text{C}$  NMR (101 MHz,  $\text{CDCl}_3$ )  $\delta$  159.6, 142.3, 138.8,

136.6, 130.2, 129.2, 128.8, 128.4, 128.3, 126.4, 126.1, 126.0, 125.9, 125.0, 124.5, 83.2, 45.1, 21.5.

HRMS (ESI)  $m/z$  calcd for  $C_{22}H_{20}NOS$   $[M+H]^+$  346.1260, found 346.1266.

#### 4-(((4-fluorophenyl)thio)methyl)-2,4-diphenyl-4H-benzo[*d*][1,3]oxazine (3ab)

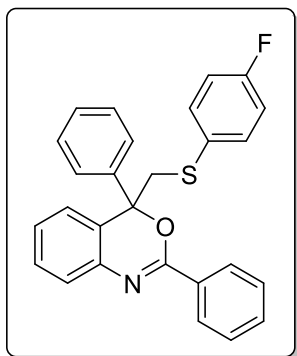

The title compound was prepared according to the general working procedure and purified by column chromatography (PE:EA = 20:1~6:1) to give the product as a colorless oil: 87 % yield (74 mg).  $^1H$  NMR (400 MHz, Chloroform-*d*)  $\delta$  8.10 (d,  $J$  = 7.6 Hz, 2H), 7.47 (t,  $J$  = 7.3 Hz, 1H), 7.43 – 7.33 (m, 6H), 7.31 – 7.21 (m, 5H), 7.22 – 7.16 (m, 1H), 7.09 (d,  $J$  = 7.6 Hz, 1H), 6.83 (t,  $J$  = 8.5 Hz, 2H), 3.90 (d,  $J$  = 14.1 Hz, 1H), 3.84 (d,  $J$  = 14.1 Hz, 1H).  $^{13}C$  NMR (101 MHz,  $CDCl_3$ )  $\delta$  161.9 (d,  $J$  = 247.1 Hz), 155.98, 141.87, 139.45, 133.39 (d,  $J$  = 8.1 Hz), 132.11, 131.55 (d,  $J$  = 3.5 Hz), 131.44, 129.27, 128.37, 128.26, 128.18, 127.90, 126.74, 126.39, 126.02, 125.54, 124.76, 115.86 (d,  $J$  = 21.9 Hz), 83.73, 46.45.  $^{19}F$  NMR (376 MHz,  $CDCl_3$ )  $\delta$  -114.97. HRMS (ESI)  $m/z$  calcd for  $C_{27}H_{20}FNOS$   $[M+H]^+$  426.1323, found 426.1337.

#### 4-(((4-chlorophenyl)thio)methyl)-2,4-diphenyl-4H-benzo[*d*][1,3]oxazine (3ac)

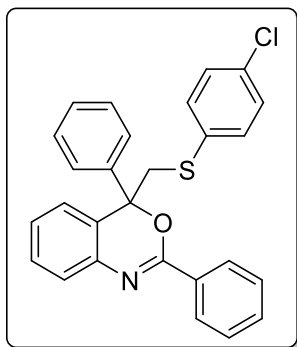

The title compound was prepared according to the general working procedure and purified by column chromatography (PE:EA = 20:1~6:1) to give the product as a colorless oil: 86 % yield (76 mg).  $^1H$  NMR

(400 MHz, Chloroform-*d*)  $\delta$  7.98 (d,  $J = 7.7$  Hz, 2H), 7.38 (t,  $J = 7.3$  Hz, 1H), 7.34 – 7.23 (m, 6H), 7.23 – 7.15 (m, 3H), 7.11 – 7.09 (m, 3H), 7.00 (d,  $J = 8.4$  Hz, 3H), 3.82 (d,  $J = 14.1$  Hz, 1H), 3.76 (d,  $J = 14.0$  Hz, 1H).  $^{13}\text{C}$  NMR (101 MHz,  $\text{CDCl}_3$ )  $\delta$  155.9, 141.8, 139.4, 135.1, 132.5, 132.0, 131.8, 131.4, 129.3, 128.9, 128.4, 128.3, 128.2, 127.8, 126.7, 126.4, 126.0, 125.6, 124.7, 83.6, 45.4. HRMS (ESI)  $m/z$  calcd for  $\text{C}_{27}\text{H}_{20}\text{ClNOS}$   $[\text{M}+\text{H}]^+$  442.1027, found 442.1036.

#### 4-(((4-bromophenyl)thio)methyl)-2,4-diphenyl-4*H*-benzo[*d*][1,3]oxazine (3ad)

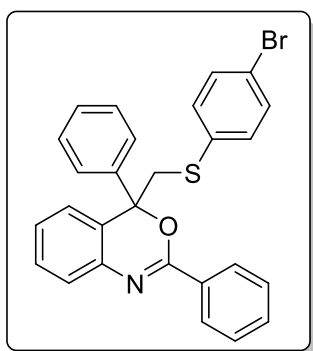

The title compound was prepared according to the general working procedure and purified by column chromatography (PE:EA = 20:1~6:1) to give the product as a colorless oil: 83 % yield (80 mg)..  $^1\text{H}$  NMR (400 MHz,  $\text{CDCl}_3$ )  $\delta$  8.22 – 8.08 (m, 3H), 7.95 (s, 1H), 7.53 (t,  $J = 7.3$  Hz, 1H), 7.49 – 7.39 (m, 3H), 7.39 – 7.29 (m, 5H), 7.29 – 7.24 (m, 2H), 7.19 – 7.04 (m, 3H), 3.97 (s, 2H).  $^{13}\text{C}$  NMR (101 MHz,  $\text{CDCl}_3$ )  $\delta$  159.0, 145.4, 145.2, 141.0, 135.6, 132.5, 131.2, 130.9, 129.0, 128.9, 128.8, 128.5, 128.4, 127.2, 126.9, 126.0, 125.7, 124.9, 121.2, 84.2, 45.6. HRMS (ESI)  $m/z$  calcd for  $\text{C}_{27}\text{H}_{21}\text{BrNOS}$   $[\text{M}+\text{H}]^+$  486.0522, found 486.0525.

#### 4-(((4-nitrophenyl)thio)methyl)-2,4-diphenyl-4H-benzo[d][1,3]oxazine (3ae)

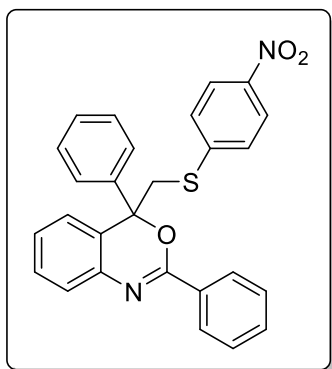

The title compound was prepared according to the general working procedure and purified by column chromatography (PE:EA = 20:1~6:1) to give the product as a yellow oil: 80 % yield (72 mg).  $^1\text{H}$  NMR (400 MHz, Chloroform-*d*)  $\delta$  8.11 – 8.03 (m, 2H), 8.00 – 7.91 (m, 2H), 7.47 – 7.40 (m, 3H), 7.39 – 7.26 (m, 9H), 7.23 – 7.18 (m, 1H), 7.15 – 7.09 (m, 1H), 4.00 (s, 2H).  $^{13}\text{C}$  NMR (101 MHz,  $\text{CDCl}_3$ )  $\delta$  155.7, 146.6, 145.2, 141.2, 139.2, 131.8, 131.7, 129.6, 128.6, 128.5, 128.2, 127.8, 127.5, 126.6, 126.4, 126.0, 125.7, 124.6, 123.7, 83.1, 42.9. HRMS (ESI)  $m/z$  calcd for  $\text{C}_{27}\text{H}_{21}\text{N}_2\text{O}_3\text{S}$   $[\text{M}+\text{H}]^+$  453.1268, found 453.1297.

#### 4-(((4-methoxyphenyl)thio)methyl)-2,4-diphenyl-4H-benzo[d][1,3]oxazine (3af)

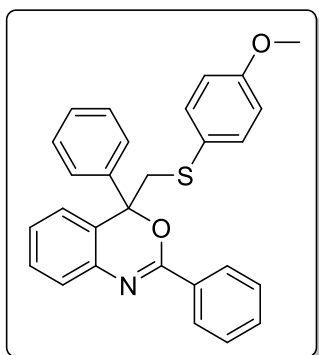

The title compound was prepared according to the general working procedure and purified by column chromatography (PE:EA = 20:1~6:1) to give the product as a colorless oil: 81 % yield (71 mg).  $^1\text{H}$  NMR (400 MHz, Chloroform-*d*)  $\delta$  8.17 – 8.04 (m, 2H), 7.50 – 7.44 (m, 1H), 7.43 – 7.33 (m, 6H), 7.29 – 7.22 (m, 5H), 7.22 – 7.16 (m, 1H), 7.13 – 7.07 (m, 1H), 6.72 – 6.57 (m, 2H), 3.86 (d,  $J = 14.0$  Hz, 1H), 3.80 (d,  $J = 14.1$  Hz, 1H), 3.68 (s, 3H).  $^{13}\text{C}$  NMR (101 MHz,  $\text{CDCl}_3$ )  $\delta$  158.0, 155.2, 141.1, 138.4, 132.9,

131.2, 130.4, 128.2, 127.3, 127.2, 127.1, 127.0, 125.9, 125.9, 125.4, 125.0, 124.4, 123.9, 113.4, 83.0, 54.2, 46.2. HRMS (ESI)  $m/z$  calcd for  $C_{28}H_{24}NO_2S$   $[M+H]^+$  438.1522, found 438.1543.

**2,4-diphenyl-4-((p-tolylthio)methyl)-4H-benzo[d][1,3]oxazine (3ag)**

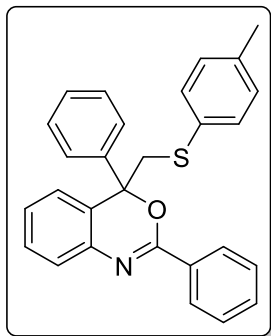

The title compound was prepared according to the general working procedure and purified by column chromatography (PE:EA = 20:1~6:1) to give the product as a colorless oil: 96 % yield (81 mg). Colorless oil.  $^1H$  NMR (400 MHz, Chloroform-*d*)  $\delta$  8.16 – 8.06 (m, 2H), 7.48 – 7.42 (m, 1H), 7.41 – 7.32 (m, 6H), 7.30 – 7.22 (m, 3H), 7.22 – 7.16 (m, 3H), 7.15 – 7.09 (m, 1H), 6.99 – 6.90 (m, 2H), 3.91 (d,  $J$  = 13.9 Hz, 1H), 3.86 (d,  $J$  = 14.0 Hz, 1H), 2.23 (s, 3H).  $^{13}C$  NMR (101 MHz,  $CDCl_3$ )  $\delta$  156.1, 142.0, 139.5, 136.5, 133.0, 132.2, 131.3, 131.0, 129.6, 129.2, 128.3, 128.2, 128.1, 129.0, 126.9, 126.3, 126.0, 125.4, 124.8, 83.7, 45.8, 20.9. HRMS (ESI)  $m/z$  calcd for  $C_{28}H_{23}NOS$   $[M+H]^+$  422.1573, found 422.1598.

**2,4-diphenyl-4-((m-tolylthio)methyl)-4H-benzo[d][1,3]oxazine (3ah)**

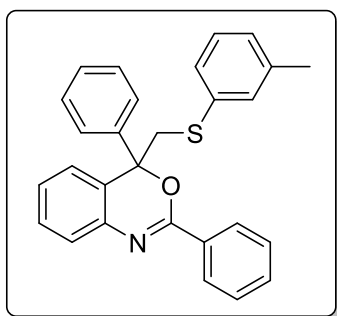

The title compound was prepared according to the general working procedure and purified by column chromatography (PE:EA = 20:1~6:1) to give the product as a colorless oil: 93 % yield (78 mg). Colorless oil.  $^1H$  NMR (400 MHz, Chloroform-*d*)  $\delta$  8.13 (d,  $J$  = 8.0 Hz, 2H), 7.45 (t,  $J$  = 7.2 Hz, 1H), 7.42 – 7.31 (m, 6H), 7.30 – 7.22 (m, 3H), 7.22 – 7.15 (m, 1H), 7.15 – 7.01 (m, 4H), 6.90 (d,  $J$  = 7.3 Hz, 1H), 3.94 (d,  $J$  = 14.0 Hz, 1H), 3.89 (d,  $J$  = 13.9 Hz, 1H), 2.17 (s, 3H).  $^{13}C$  NMR (101 MHz,  $CDCl_3$ )  $\delta$  156.1, 141.9, 139.5, 138.6,



136.3, 132.2, 131.3, 131.1, 129.2, 128.6, 128.3, 128.2, 128.1, 128.0, 127.4, 127.3, 126.9, 126.4, 126.1, 125.5, 124.8, 83.6, 45.2, 21.2. HRMS (ESI)  $m/z$  calcd for  $C_{28}H_{23}NOS$   $[M+H]^+$  422.1573, found 422.1598.

### 2,4-diphenyl-4-((*o*-tolylthio)methyl)-4*H*-benzo[*d*][1,3]oxazine (3ai)

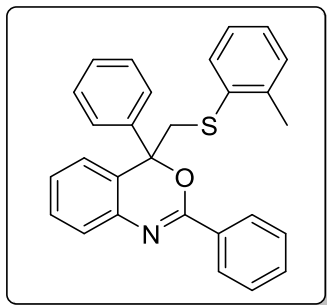

The title compound was prepared according to the general working procedure and purified by column chromatography (PE:EA = 20:1~6:1) to give the product as a colorless oil: 88 % yield (74 mg).  $^1H$  NMR (400 MHz, Chloroform-*d*)  $\delta$  8.13 (d,  $J$  = 8.1 Hz, 2H), 7.47 (t,  $J$  = 7.2 Hz, 1H), 7.43 – 7.34 (m, 6H), 7.32 – 7.19 (m, 5H), 7.13 (d,  $J$  = 7.7 Hz, 1H), 7.08 – 7.02 (m, 3H), 3.90 (d,  $J$  = 13.7 Hz, 1H), 3.84 (d,  $J$  = 13.7 Hz, 1H), 2.25 (s, 3H).  $^{13}C$  NMR (101 MHz,  $CDCl_3$ )  $\delta$  156.2, 141.9, 139.5, 138.9, 135.9, 132.2, 131.4, 130.5, 130.1, 129.2, 128.3, 128.2, 128.1, 128.0, 126.8, 126.5, 126.4, 126.3, 126.0, 125.5, 124.9, 83.7, 44.8, 20.6. HRMS (ESI)  $m/z$  calcd for  $C_{28}H_{23}NOS$   $[M+H]^+$  422.1573, found 422.1598.

### 2,4-diphenyl-4-((propylthio)methyl)-4*H*-benzo[*d*][1,3]oxazine (3aj)

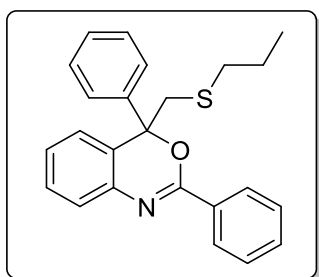

The title compound was prepared according to the general working procedure and purified by column chromatography (PE:EA = 20:1~6:1) to give the product as a colorless oil: 73 % yield (54 mg).  $^1H$  NMR (400 MHz,  $CDCl_3$ )  $\delta$  8.26 (d,  $J$  = 7.3 Hz, 2H), 7.56 – 7.39 (m, 5H), 7.36 (d,  $J$  = 4.0 Hz, 2H), 7.33 – 7.19 (m, 5H), 7.13 (d,  $J$  = 7.6 Hz, 1H), 3.57 – 3.41 (m, 2H), 2.52 – 2.33 (m, 2H), 1.62 – 1.43 (m, 2H), 0.86 (t,  $J$  = 7.3 Hz, 3H).  $^{13}C$  NMR (101 MHz,  $CDCl_3$ )  $\delta$  156.2, 142.2, 139.5, 132.4, 131.5, 129.1, 128.3, 128.2,

128.0, 127.4, 126.3, 126.2, 125.4, 124.9, 84.1, 42.2, 36.2, 22.9, 13.3. HRMS (ESI)  $m/z$  calcd for  $C_{24}H_{24}NOS$   $[M+H]^+$  374.1573, found 374.1577.

**4-((cyclohexylthio)methyl)-2,4-diphenyl-4H-benzo[d][1,3]oxazine (3ak)**

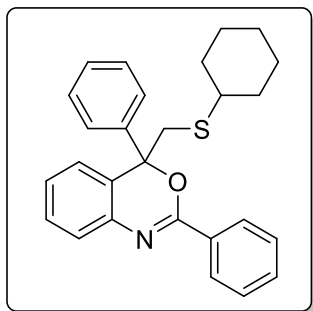

The title compound was prepared according to the general working procedure and purified by column chromatography (PE:EA = 20:1~6:1) to give the product as a colorless oil: 68 % yield (56 mg).  $^1H$  NMR (400 MHz,  $CDCl_3$ )  $\delta$  8.26 (d,  $J = 7.5$  Hz, 2H), 7.53 – 7.39 (m, 5H), 7.38 – 7.25 (m, 5H), 7.20 (t,  $J = 6.9$  Hz, 1H), 7.10 (d,  $J = 7.6$  Hz, 1H), 3.50 (s, 2H), 2.50 (t,  $J = 10.6$  Hz, 1H), 1.92 (d,  $J = 12.4$  Hz, 1H), 1.83 (d,  $J = 12.5$  Hz, 1H), 1.65 (t,  $J = 12.4$  Hz, 2H), 1.57 – 1.45 (m, 1H), 1.31 – 1.08 (m, 5H).  $^{13}C$  NMR (101 MHz,  $CDCl_3$ )  $\delta$  156.3, 142.1, 139.4, 132.4, 131.5, 129.1, 128.3, 128.1, 128.0, 127.6, 126.3, 125.3, 125.0, 83.9, 45.1, 39.9, 33.6, 33.5, 26.0, 25.9, 25.6. HRMS (ESI)  $m/z$  calcd for  $C_{27}H_{28}NOS$   $[M+H]^+$  414.1886, found 414.1887.

## 5. DFT calculations

### 5.1 Gibbs energy profiles

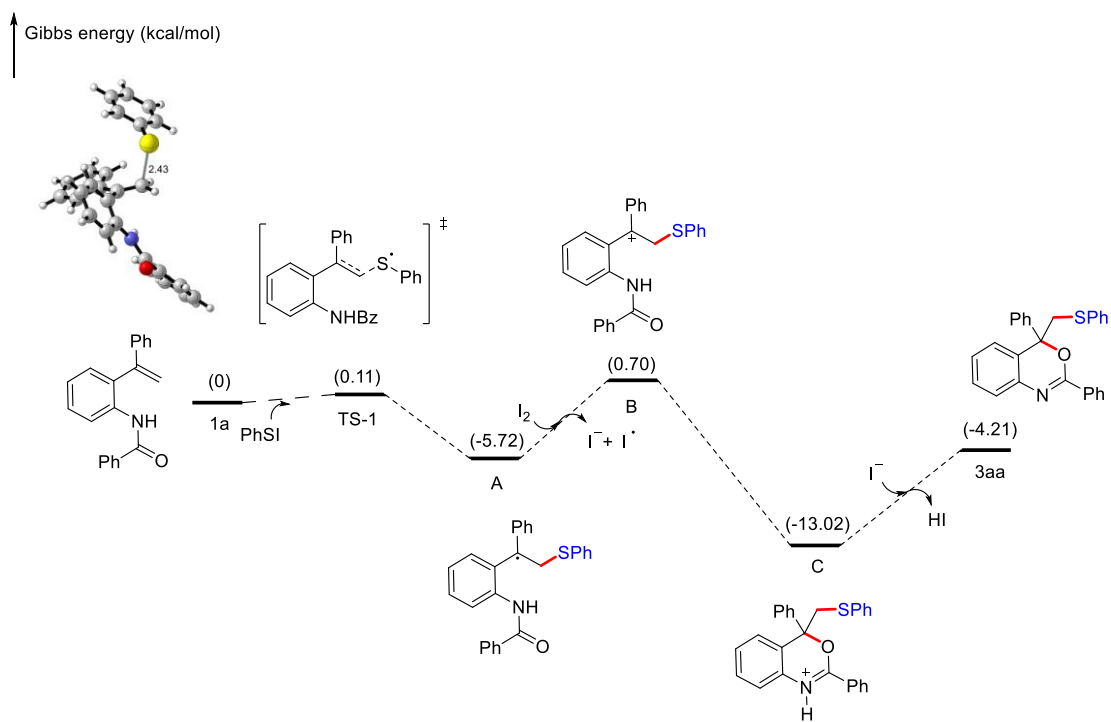

Fig. S1 Gibbs energy profiles for the radical pathway.

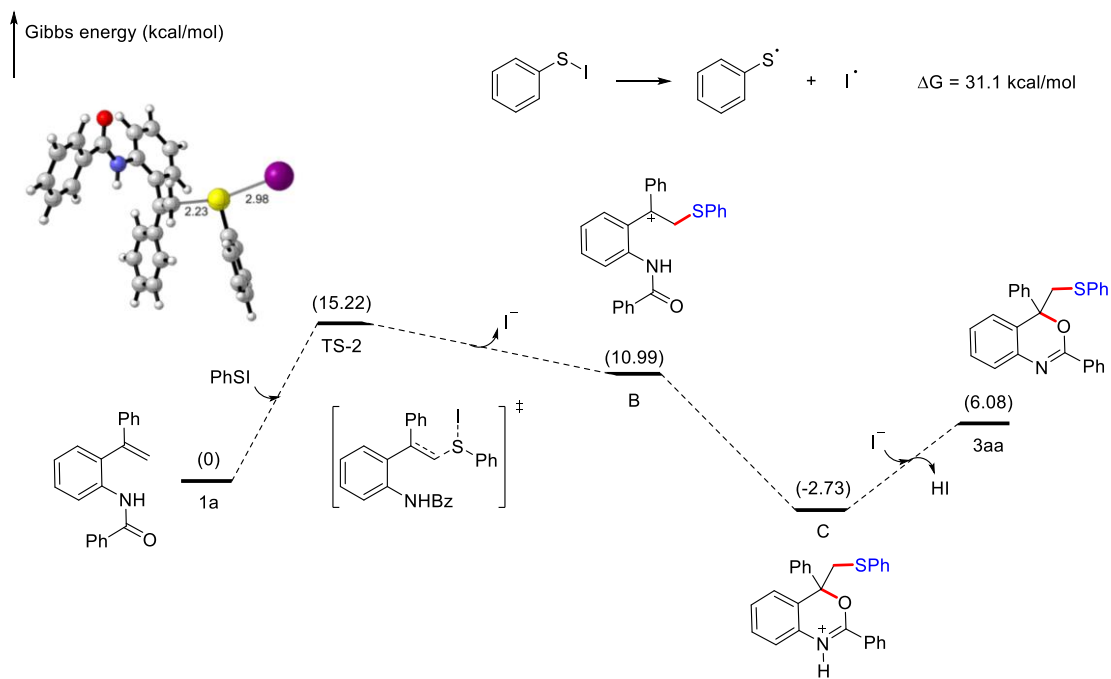

Fig. S2 Gibbs energy profiles for the reaction pathway involved PhSI.

## 5.2 Computational Methods and results

All the calculations were performed with the Gaussian 09 RevB.01 program suite.<sup>2</sup> The geometry optimization and energy calculations of the reactants, transition states, intermediates and products in this manuscript were fully optimized by the DFT/B3LYP method with the 6-311G (d, p) basis set (LanL2DZ for iodine) in solution phase using CPCM( Conductro-like Polarizable Continuum Model ) in acetonitrile. Vibrational frequency analysis was calculated at the same level of theory to validate each structure as either a minimum or a transition state. For each transition state, the intrinsic reaction coordinate (IRC) analysis was conducted to ensure that it connects the right reactant and product. 3D structures were generated by CYLview, key bond distances shown in units of Å.

## 5.3 Gibbs free energy and Cartesian coordinate of optimized structures

### Compound 1a

EE+TCG: -940.420155 Hartree

Cartesian coordinate of optimized structures:

|   |             |             |             |
|---|-------------|-------------|-------------|
| C | -0.22681300 | 3.60022400  | -0.66561100 |
| C | -1.11108600 | 2.84962500  | -1.43641900 |
| C | -1.05485700 | 1.46000900  | -1.40066300 |
| C | -0.13514500 | 0.80537500  | -0.57673500 |
| C | 0.77205200  | 1.55344800  | 0.20362800  |
| C | 0.70865400  | 2.95121700  | 0.13565300  |
| C | 1.76565500  | 0.89844900  | 1.10917500  |
| C | 1.77128500  | 1.19524200  | 2.41676000  |
| C | 2.76407900  | -0.03602500 | 0.51563300  |
| N | -0.09405700 | -0.61502900 | -0.53545700 |
| C | 3.23066000  | -1.15299100 | 1.22837600  |
| C | 4.18989800  | -1.99906500 | 0.68062500  |
| C | 4.69958000  | -1.75312400 | -0.59471900 |
| C | 4.23708600  | -0.65633200 | -1.31930600 |
| C | 3.27543700  | 0.19107500  | -0.77241600 |

|   |             |             |             |
|---|-------------|-------------|-------------|
| C | -1.12169800 | -1.52682500 | -0.53349100 |
| C | -2.48246500 | -1.09562600 | -0.07246600 |
| O | -0.90961900 | -2.69285000 | -0.85265200 |
| C | -3.59909900 | -1.67116800 | -0.68899000 |
| C | -4.88216900 | -1.36300000 | -0.24755400 |
| C | -5.05903400 | -0.50147700 | 0.83554800  |
| C | -3.94888100 | 0.05249200  | 1.47225800  |
| C | -2.66483400 | -0.23560200 | 1.01657900  |
| H | -0.25518900 | 4.68307100  | -0.69586000 |
| H | -1.83317900 | 3.34044700  | -2.07837500 |
| H | -1.72798000 | 0.87337600  | -2.01309300 |
| H | 1.41127900  | 3.52990500  | 0.72365300  |
| H | 2.51410800  | 0.78460100  | 3.09057400  |
| H | 1.03425400  | 1.86459400  | 2.84403900  |
| H | 0.81030000  | -1.04560000 | -0.68985200 |
| H | 2.82219900  | -1.36890300 | 2.20855700  |
| H | 4.53210700  | -2.85875300 | 1.24565900  |
| H | 5.44352600  | -2.41554000 | -1.02203600 |
| H | 4.62525600  | -0.45696200 | -2.31170800 |
| H | 2.92821000  | 1.04517600  | -1.34252500 |
| H | -3.44977200 | -2.35765700 | -1.51340600 |
| H | -5.74243600 | -1.79977800 | -0.74144100 |
| H | -6.05787700 | -0.26811800 | 1.18619300  |
| H | -4.08209000 | 0.70840500  | 2.32474600  |
| H | -1.80719300 | 0.19420200  | 1.51909000  |

### Compound 2a

EE+TCG: -1259.707927 Hartree

Cartesian coordinate of optimized structures:

|   |            |            |            |
|---|------------|------------|------------|
| C | 2.67963100 | 1.86465700 | 0.72908300 |
|---|------------|------------|------------|

|   |             |             |             |
|---|-------------|-------------|-------------|
| C | 1.74219600  | 0.86992400  | 1.00244200  |
| C | 1.86184000  | -0.38479700 | 0.39501500  |
| C | 2.92446300  | -0.64182800 | -0.47913200 |
| C | 3.85258400  | 0.35876800  | -0.75312000 |
| C | 3.73205200  | 1.61135200  | -0.14918000 |
| H | 2.58559200  | 2.83567400  | 1.20130300  |
| H | 0.92208500  | 1.06168500  | 1.68330000  |
| H | 3.01899700  | -1.61814100 | -0.93881200 |
| H | 4.67382600  | 0.15880300  | -1.43162300 |
| H | 4.45928400  | 2.38654700  | -0.36127400 |
| S | 0.69395500  | -1.68081400 | 0.81248000  |
| S | -0.69395500 | -1.68081400 | -0.81248000 |
| C | -1.86184000 | -0.38479700 | -0.39501500 |
| C | -2.92446300 | -0.64182800 | 0.47913100  |
| C | -1.74219600 | 0.86992400  | -1.00244100 |
| C | -3.85258500 | 0.35876900  | 0.75311900  |
| H | -3.01899800 | -1.61814100 | 0.93881200  |
| C | -2.67963100 | 1.86465700  | -0.72908300 |
| H | -0.92208500 | 1.06168500  | -1.68329900 |
| C | -3.73205200 | 1.61135200  | 0.14917900  |
| H | -4.67382700 | 0.15880300  | 1.43162300  |
| H | -2.58559100 | 2.83567400  | -1.20130300 |
| H | -4.45928400 | 2.38654700  | 0.36127400  |

### Compound I<sub>2</sub>

EE+TCG: -22.796874 Hartree

Cartesian coordinate of optimized structures:

|   |            |            |             |
|---|------------|------------|-------------|
| I | 0.00000000 | 0.00000000 | 1.43308000  |
| I | 0.00000000 | 0.00000000 | -1.43308000 |

### Compound PhSI

EE+TCG: -641.252344 Hartree

Cartesian coordinate of optimized structures:

|   |             |             |             |
|---|-------------|-------------|-------------|
| C | -3.21564700 | -1.21085500 | -0.40572700 |
| C | -1.96991300 | -1.21592200 | 0.21199900  |
| C | -1.34391000 | -0.00009900 | 0.52619300  |
| C | -1.96982500 | 1.21582900  | 0.21226500  |
| C | -3.21561500 | 1.21100200  | -0.40536300 |
| C | -3.83811200 | 0.00012900  | -0.71353900 |
| H | -3.70226000 | -2.14898700 | -0.64461900 |
| H | -1.47794300 | -2.14925900 | 0.45542700  |
| H | -1.47781100 | 2.14908200  | 0.45592900  |
| H | -3.70217100 | 2.14922100  | -0.64402100 |
| H | -4.80981600 | 0.00018900  | -1.19344800 |
| S | 0.17234600  | -0.00018900 | 1.44005800  |
| I | 1.99491700  | 0.00004300  | -0.34009700 |

### Compound PhS·

EE+TCG: -629.820917 Hartree

Cartesian coordinate of optimized structures:

|   |             |             |             |
|---|-------------|-------------|-------------|
| C | -1.54333700 | -1.20343200 | 0.00000400  |
| C | -0.15032900 | -1.21319000 | 0.00000300  |
| C | 0.55175700  | -0.00000300 | 0.00001000  |
| C | -0.15032600 | 1.21318900  | 0.00000200  |
| C | -1.54333300 | 1.20343400  | 0.00000500  |
| C | -2.24679600 | 0.00000200  | 0.00001200  |
| H | -2.07704400 | -2.14719100 | 0.00000100  |
| H | 0.38352700  | -2.15605800 | -0.00000500 |
| H | 0.38353300  | 2.15605400  | -0.00000600 |
| H | -2.07703900 | 2.14719400  | 0.00000300  |

|   |             |            |             |
|---|-------------|------------|-------------|
| H | -3.33017400 | 0.00000400 | 0.00001300  |
| S | 2.32571200  | 0.00000000 | -0.00001400 |

### Compound I

EE+TCG: -11.381837 Hartree

Cartesian coordinate of optimized structures:

|   |            |            |            |
|---|------------|------------|------------|
| I | 0.00000000 | 0.00000000 | 0.00000000 |
|---|------------|------------|------------|

### Compound I

EE+TCG: -11.588041 Hartree

Cartesian coordinate of optimized structures:

|   |            |            |            |
|---|------------|------------|------------|
| I | 0.00000000 | 0.00000000 | 0.00000000 |
|---|------------|------------|------------|

### Compound HI

EE+TCG: -12.004155 Hartree

Cartesian coordinate of optimized structures:

|   |            |            |             |
|---|------------|------------|-------------|
| I | 0.00000000 | 0.00000000 | 0.02989600  |
| H | 0.00000000 | 0.00000000 | -1.58449200 |

### Compound TS-1

EE+TCG: -1570.240889 Hartree

Cartesian coordinate of optimized structures:

|   |             |             |             |
|---|-------------|-------------|-------------|
| C | 0.05132700  | 4.17279300  | -0.21839600 |
| C | 1.42425100  | 4.27345000  | -0.43203600 |
| C | 2.22996000  | 3.14007300  | -0.41736900 |
| C | 1.66574600  | 1.87487700  | -0.19906800 |
| C | 0.26915500  | 1.75685900  | 0.00383300  |
| C | -0.50982900 | 2.92085900  | 0.00596200  |
| C | -0.40123100 | 0.43500400  | 0.18501900  |
| C | -0.38389600 | -0.46195200 | -0.87307900 |
| N | 2.45110300  | 0.70711300  | -0.11494400 |



|   |             |             |             |
|---|-------------|-------------|-------------|
| C | 3.75800500  | 0.51409100  | -0.49179400 |
| O | 4.44781000  | 1.37511100  | -1.02509100 |
| C | 4.30038000  | -0.86150900 | -0.22121100 |
| C | 5.37121000  | -1.29614500 | -1.01183300 |
| C | 5.93187900  | -2.55250400 | -0.81075500 |
| C | 5.44056200  | -3.38379700 | 0.19652500  |
| C | 4.38827500  | -2.95120800 | 1.00169300  |
| C | 3.81798700  | -1.69710800 | 0.79460000  |
| S | -2.18272600 | 0.09293300  | -2.40948800 |
| C | -1.10278900 | 0.15657800  | 1.44281400  |
| C | -2.03406500 | -0.89858000 | 1.56141300  |
| C | -2.65974000 | -1.16798400 | 2.77099600  |
| C | -2.37443400 | -0.39990500 | 3.90194500  |
| C | -1.45530700 | 0.64481200  | 3.80737100  |
| C | -0.83145900 | 0.92260100  | 2.59699100  |
| C | -3.63317900 | -0.61126100 | -1.70019500 |
| C | -3.89827700 | -1.98997600 | -1.81864700 |
| C | -5.05860600 | -2.53390600 | -1.27964900 |
| C | -5.97809200 | -1.71570600 | -0.61897200 |
| C | -5.72907800 | -0.34737500 | -0.49837000 |
| C | -4.56659400 | 0.20201800  | -1.02815600 |
| H | -0.57578600 | 5.05620700  | -0.22863100 |
| H | 1.87980100  | 5.24173200  | -0.60542600 |
| H | 3.29346900  | 3.21934300  | -0.57561800 |
| H | -1.57725700 | 2.82822900  | 0.16789400  |
| H | -0.69959300 | -1.48768600 | -0.73952300 |
| H | 0.29832100  | -0.29127300 | -1.69510400 |
| H | 1.95173300  | -0.11530000 | 0.19082000  |
| H | 5.75088800  | -0.63676700 | -1.78207600 |
| H | 6.75257000  | -2.88331300 | -1.43658700 |

|   |             |             |             |
|---|-------------|-------------|-------------|
| H | 5.88014700  | -4.36142200 | 0.35732100  |
| H | 4.01456900  | -3.58564700 | 1.79675300  |
| H | 3.02153800  | -1.37008700 | 1.45324500  |
| H | -2.28649600 | -1.49951200 | 0.69812600  |
| H | -3.37733900 | -1.97802400 | 2.83233100  |
| H | -2.86385600 | -0.61409500 | 4.84491600  |
| H | -1.22166400 | 1.24405100  | 4.67990600  |
| H | -0.11536700 | 1.73225700  | 2.54210600  |
| H | -3.18955600 | -2.62267300 | -2.33942900 |
| H | -5.25062400 | -3.59625600 | -1.37878700 |
| H | -6.88336500 | -2.14216400 | -0.20265900 |
| H | -6.44097500 | 0.29119400  | 0.01216900  |
| H | -4.37073500 | 1.26300400  | -0.93240800 |

### Compound TS-2

EE+TCG: -1581.648249 Hartree

Cartesian coordinate of optimized structures:

|   |             |             |             |
|---|-------------|-------------|-------------|
| C | -0.40859200 | -1.10437500 | 3.89623700  |
| C | -1.60426100 | -1.81923500 | 3.85245000  |
| C | -2.48118900 | -1.67253400 | 2.78445600  |
| C | -2.16594400 | -0.81410800 | 1.72194900  |
| C | -0.94463300 | -0.09739500 | 1.74708900  |
| C | -0.09557900 | -0.24233400 | 2.85424500  |
| C | -0.51797800 | 0.76643100  | 0.61163700  |
| C | -0.31966800 | 0.14588000  | -0.63050300 |
| N | -3.06518200 | -0.58757100 | 0.66076500  |
| C | -4.09745800 | -1.39282000 | 0.23026000  |
| O | -4.34782700 | -2.48650100 | 0.71806800  |
| C | -4.89837400 | -0.84073800 | -0.91395700 |
| C | -5.58035300 | -1.75890000 | -1.72191000 |

|   |             |             |             |
|---|-------------|-------------|-------------|
| C | -6.34886500 | -1.31896400 | -2.79373200 |
| C | -6.45975800 | 0.04625800  | -3.06020000 |
| C | -5.80047900 | 0.96820500  | -2.24899600 |
| C | -5.02101300 | 0.52906400  | -1.18140300 |
| S | 1.75120200  | -0.63802000 | -0.36159100 |
| C | -0.31844700 | 2.19565500  | 0.82660300  |
| C | 0.20302300  | 3.03839700  | -0.18320300 |
| C | 0.32993400  | 4.40277700  | 0.02282900  |
| C | -0.06353100 | 4.97202100  | 1.23632400  |
| C | -0.59117900 | 4.16309500  | 2.24226700  |
| C | -0.71789900 | 2.79550000  | 2.04326300  |
| C | 2.67924800  | 0.78419600  | -0.89449400 |
| C | 2.75096200  | 1.11129400  | -2.25673800 |
| C | 3.49244900  | 2.21405200  | -2.66628900 |
| C | 4.17567100  | 2.98765600  | -1.72528200 |
| C | 4.11218700  | 2.66085800  | -0.37116400 |
| C | 3.36301700  | 1.56497100  | 0.04775900  |
| H | 0.27355400  | -1.21869600 | 4.72966100  |
| H | -1.86628200 | -2.49158600 | 4.66111300  |
| H | -3.41095600 | -2.21799700 | 2.76028800  |
| H | 0.83711700  | 0.30767900  | 2.86935100  |
| H | -0.22095000 | 0.73491600  | -1.53194100 |
| H | -0.74702000 | -0.83656900 | -0.77912900 |
| H | -2.87907100 | 0.22727600  | 0.09646400  |
| H | -5.49449300 | -2.81460800 | -1.49780200 |
| H | -6.86293500 | -2.03865100 | -3.42006200 |
| H | -7.06258300 | 0.39020800  | -3.89270200 |
| H | -5.89736200 | 2.03018400  | -2.44123600 |
| H | -4.54317000 | 1.26617400  | -0.54626800 |
| H | 0.51730000  | 2.62703600  | -1.13159200 |

|   |             |             |             |
|---|-------------|-------------|-------------|
| H | 0.73584200  | 5.02746100  | -0.76353200 |
| H | 0.03406300  | 6.03998400  | 1.39199700  |
| H | -0.91084500 | 4.60016100  | 3.18054300  |
| H | -1.14743500 | 2.18491700  | 2.82506300  |
| H | 2.23383700  | 0.49840900  | -2.98498000 |
| H | 3.54563000  | 2.46573200  | -3.71898200 |
| H | 4.75799300  | 3.84242200  | -2.04905700 |
| H | 4.64269000  | 3.26037300  | 0.35914200  |
| H | 3.31147800  | 1.30456300  | 1.09745100  |
| I | 4.00651900  | -2.57897200 | -0.46443800 |

### Compound A

EE+TCG: -1570.250191 Hartree

Cartesian coordinate of optimized structures:

|   |             |             |             |
|---|-------------|-------------|-------------|
| C | -0.16270014 | 4.19698528  | 0.13393852  |
| C | 1.20483067  | 4.34195333  | -0.08957369 |
| C | 2.03166963  | 3.22565600  | -0.16266677 |
| C | 1.49080660  | 1.94076424  | -0.02647147 |
| C | 0.09899835  | 1.77368499  | 0.17104557  |
| C | -0.70051139 | 2.92099309  | 0.26745048  |
| C | -0.52297591 | 0.42309477  | 0.22859784  |
| C | -0.53005323 | -0.35341497 | -1.04469167 |
| N | 2.30014230  | 0.78392361  | -0.00927611 |
| C | 3.56535750  | 0.61766019  | -0.51838310 |
| O | 4.16217872  | 1.48684434  | -1.14240571 |
| C | 4.17999178  | -0.73176593 | -0.27364201 |
| C | 5.17553116  | -1.15748173 | -1.16149015 |
| C | 5.79478097  | -2.39031425 | -0.98757687 |
| C | 5.43918264  | -3.20561596 | 0.08772010  |
| C | 4.46418223  | -2.78048780 | 0.98835353  |

|   |             |             |             |
|---|-------------|-------------|-------------|
| C | 3.83529184  | -1.55040791 | 0.80959575  |
| S | -1.81595615 | 0.22208182  | -2.30537977 |
| C | -1.14687562 | -0.05327540 | 1.42903916  |
| C | -1.90113990 | -1.25978477 | 1.47196561  |
| C | -2.46528755 | -1.71636240 | 2.65255656  |
| C | -2.30716649 | -1.00125188 | 3.84359347  |
| C | -1.56782216 | 0.18556345  | 3.83250650  |
| C | -0.99950171 | 0.65183823  | 2.65827320  |
| C | -3.34480022 | -0.50590124 | -1.71110241 |
| C | -3.60899749 | -1.86587035 | -1.91669818 |
| C | -4.81344425 | -2.41585627 | -1.48448572 |
| C | -5.76891620 | -1.61115684 | -0.86262645 |
| C | -5.51594550 | -0.25364099 | -0.67292722 |
| C | -4.30682516 | 0.29949926  | -1.09239322 |
| H | -0.80599672 | 5.06671547  | 0.19676043  |
| H | 1.63869765  | 5.32949418  | -0.19762918 |
| H | 3.09279601  | 3.33784565  | -0.32167550 |
| H | -1.76486827 | 2.79728722  | 0.42899845  |
| H | -0.66526678 | -1.42437490 | -0.91081040 |
| H | 0.39241210  | -0.19849751 | -1.60550239 |
| H | 1.85584166  | -0.03690912 | 0.37665189  |
| H | 5.45043770  | -0.51014918 | -1.98467270 |
| H | 6.55580254  | -2.71518182 | -1.68755106 |
| H | 5.92487529  | -4.16459985 | 0.22673078  |
| H | 4.19724597  | -3.40137552 | 1.83544770  |
| H | 3.10310982  | -1.22674550 | 1.54030632  |
| H | -2.05891273 | -1.83182694 | 0.56822941  |
| H | -3.03872808 | -2.63659475 | 2.64654500  |
| H | -2.75045945 | -1.36326209 | 4.76373936  |
| H | -1.43082196 | 0.74631959  | 4.75044152  |

|   |             |             |             |
|---|-------------|-------------|-------------|
| H | -0.41978306 | 1.56551358  | 2.67649588  |
| H | -2.87445309 | -2.48734482 | -2.41532407 |
| H | -5.00980250 | -3.47009886 | -1.64324204 |
| H | -6.70807726 | -2.04014580 | -0.53281533 |
| H | -6.25663172 | 0.37648180  | -0.19389137 |
| H | -4.10632641 | 1.35298624  | -0.94043144 |

## Compound B

EE+TCG: -1570.066954 Hartree

Cartesian coordinate of optimized structures:

|   |             |             |             |
|---|-------------|-------------|-------------|
| C | 0.25932000  | 4.57904500  | 0.31655800  |
| C | 1.57895300  | 4.41591600  | 0.76091900  |
| C | 2.19461800  | 3.17766200  | 0.73168900  |
| C | 1.51026800  | 2.03365700  | 0.28963500  |
| C | 0.12014500  | 2.16582500  | -0.09753300 |
| C | -0.43670300 | 3.47864800  | -0.11757600 |
| C | -0.71985500 | 1.07498800  | -0.49816300 |
| C | -1.76267900 | 1.30008300  | -1.53292200 |
| N | 2.19307900  | 0.83321100  | 0.13556700  |
| C | 3.56947800  | 0.65079500  | -0.03217800 |
| O | 4.36767200  | 1.56976800  | -0.05880700 |
| C | 3.99500900  | -0.77324900 | -0.20536000 |
| C | 5.16512600  | -1.00987900 | -0.93839900 |
| C | 5.62738200  | -2.30788600 | -1.11997500 |
| C | 4.93826400  | -3.38098500 | -0.55295100 |
| C | 3.78612600  | -3.15075400 | 0.19670600  |
| C | 3.31168300  | -1.85270500 | 0.36816500  |
| S | -3.38025600 | 1.64623500  | -0.64473100 |
| C | -0.64830200 | -0.23358500 | 0.12074800  |
| C | -0.93524600 | -1.41765300 | -0.60034400 |

|   |             |             |             |
|---|-------------|-------------|-------------|
| C | -0.91217800 | -2.64911100 | 0.03508200  |
| C | -0.64879000 | -2.72543600 | 1.40369300  |
| C | -0.38699400 | -1.56525100 | 2.13956100  |
| C | -0.37250900 | -0.33361300 | 1.50847300  |
| C | -4.06957800 | 0.02339400  | -0.35660200 |
| C | -4.49931200 | -0.77698600 | -1.42378100 |
| C | -5.10378400 | -2.00250200 | -1.16499100 |
| C | -5.30232000 | -2.42352400 | 0.15153900  |
| C | -4.89093900 | -1.61861600 | 1.21245700  |
| C | -4.26867600 | -0.39730000 | 0.96324700  |
| H | -0.21346300 | 5.55216700  | 0.33423100  |
| H | 2.13636900  | 5.27016900  | 1.12612600  |
| H | 3.22544600  | 3.08272000  | 1.02777000  |
| H | -1.47060000 | 3.60150900  | -0.40566400 |
| H | -1.91785900 | 0.43454800  | -2.16984200 |
| H | -1.56977700 | 2.16923300  | -2.15413000 |
| H | 1.63495200  | 0.01948300  | -0.07282200 |
| H | 5.69725800  | -0.16838600 | -1.36362800 |
| H | 6.52543800  | -2.48402800 | -1.70013700 |
| H | 5.30223900  | -4.39264200 | -0.68955200 |
| H | 3.25914700  | -3.97922200 | 0.65463900  |
| H | 2.43436800  | -1.69175900 | 0.98312200  |
| H | -1.11768700 | -1.37761000 | -1.66550300 |
| H | -1.10320400 | -3.55040600 | -0.53321100 |
| H | -0.65055300 | -3.68849800 | 1.89983700  |
| H | -0.20526300 | -1.62643500 | 3.20515400  |
| H | -0.19981600 | 0.56684100  | 2.08389900  |
| H | -4.36911300 | -0.44004000 | -2.44532300 |
| H | -5.43243200 | -2.62308900 | -1.99019800 |
| H | -5.78095400 | -3.37568300 | 0.34795600  |

|   |             |             |            |
|---|-------------|-------------|------------|
| H | -5.04671400 | -1.94224000 | 2.23472600 |
| H | -3.93765600 | 0.22711900  | 1.78356300 |

### Compound C

EE+TCG: -1570.088824 Hartree

Cartesian coordinate of optimized structures:

|   |             |             |             |
|---|-------------|-------------|-------------|
| C | 3.68044800  | -1.61811300 | -2.35750300 |
| C | 3.56891700  | -0.54477700 | -3.23946800 |
| C | 2.66508400  | 0.47904300  | -2.97983200 |
| C | 1.89107400  | 0.41547000  | -1.82385900 |
| C | 1.99718700  | -0.64152000 | -0.91915400 |
| C | 2.89756700  | -1.66637300 | -1.20566100 |
| N | 0.92999000  | 1.42011900  | -1.56080400 |
| C | -0.05870900 | 1.25459500  | -0.70281600 |
| O | -0.06607700 | 0.21911100  | 0.08710800  |
| C | 1.19133100  | -0.57038800 | 0.36155600  |
| C | 0.66437400  | -1.93143400 | 0.84482700  |
| C | -1.18506600 | 2.17603200  | -0.61142900 |
| C | -1.50466800 | 3.04010000  | -1.67314400 |
| C | -2.57725300 | 3.91181800  | -1.55433300 |
| C | -3.34055100 | 3.92652500  | -0.38561700 |
| C | -3.03498300 | 3.06262600  | 0.66602700  |
| C | -1.96468500 | 2.18546600  | 0.55713600  |
| C | 1.91123000  | 0.15543600  | 1.50349300  |
| C | 1.19563900  | 0.48522200  | 2.66412300  |
| C | 1.82741500  | 1.11879300  | 3.72849300  |
| C | 3.18628700  | 1.42540600  | 3.65505500  |
| C | 3.90400700  | 1.09941400  | 2.50829600  |
| C | 3.27096100  | 0.47137600  | 1.43583100  |
| S | -0.29544900 | -2.91544000 | -0.38086400 |



|   |             |             |             |
|---|-------------|-------------|-------------|
| C | -2.00028600 | -2.48630400 | 0.00656600  |
| C | -2.77387600 | -1.83021000 | -0.95467300 |
| C | -4.11815900 | -1.56026100 | -0.70011700 |
| C | -4.68964600 | -1.92961900 | 0.51608000  |
| C | -3.91669200 | -2.58306500 | 1.47624900  |
| C | -2.57890100 | -2.87475300 | 1.21965500  |
| H | 4.38172600  | -2.41774300 | -2.56025400 |
| H | 4.17927200  | -0.50567700 | -4.13287600 |
| H | 2.55280700  | 1.30992200  | -3.66594000 |
| H | 3.01378800  | -2.49770400 | -0.52267700 |
| H | 0.94599500  | 2.26012800  | -2.12558900 |
| H | 1.51594800  | -2.54236000 | 1.14167700  |
| H | 0.04643400  | -1.79016500 | 1.72903200  |
| H | -0.94771500 | 3.01823000  | -2.60178200 |
| H | -2.82532900 | 4.57168000  | -2.37598200 |
| H | -4.17763400 | 4.60877400  | -0.29815600 |
| H | -3.62985400 | 3.07408800  | 1.57064900  |
| H | -1.72110300 | 1.51749800  | 1.37113000  |
| H | 0.13942900  | 0.25776800  | 2.73892600  |
| H | 1.25835300  | 1.37111100  | 4.61548800  |
| H | 3.67923700  | 1.91622800  | 4.48604600  |
| H | 4.95936800  | 1.33551300  | 2.43986200  |
| H | 3.84645300  | 0.23004900  | 0.55224900  |
| H | -2.32496900 | -1.53054400 | -1.89367900 |
| H | -4.71386200 | -1.05322300 | -1.45045000 |
| H | -5.73300400 | -1.71338900 | 0.71425400  |
| H | -4.35830700 | -2.88118900 | 2.42020800  |
| H | -1.98943700 | -3.40870400 | 1.95578200  |

## Compound 3aa

EE+TCG: -1569.658670 Hartree

Cartesian coordinate of optimized structures:

|   |             |             |             |
|---|-------------|-------------|-------------|
| C | 0.83452000  | -3.20279700 | 2.86020600  |
| C | 1.50309200  | -2.34074800 | 3.73145700  |
| C | 1.82096400  | -1.05185300 | 3.32316900  |
| C | 1.47215800  | -0.60363400 | 2.04092800  |
| C | 0.80089000  | -1.47213600 | 1.16719400  |
| C | 0.49107300  | -2.76696700 | 1.58254900  |
| N | 1.81174800  | 0.70690400  | 1.68069400  |
| C | 1.55905600  | 1.09139900  | 0.48519300  |
| O | 0.97970500  | 0.34625600  | -0.48436200 |
| C | 0.39831500  | -0.97359100 | -0.21765900 |
| C | -1.12551000 | -0.80392800 | -0.34839300 |
| C | 1.92034800  | 2.44736200  | 0.01313200  |
| C | 1.60365500  | 2.87313300  | -1.28429100 |
| C | 1.95220500  | 4.15377500  | -1.70578400 |
| C | 2.61742700  | 5.02088600  | -0.84084700 |
| C | 2.93549700  | 4.60201500  | 0.45274900  |
| C | 2.59118700  | 3.32482900  | 0.87788900  |
| C | 0.97244400  | -1.88574600 | -1.31424300 |
| C | 0.18244300  | -2.71245200 | -2.11650500 |
| C | 0.76710200  | -3.53281800 | -3.08390600 |
| C | 2.14625700  | -3.53457200 | -3.26401700 |
| C | 2.94314700  | -2.71024800 | -2.46806800 |
| C | 2.36128100  | -1.89670500 | -1.50252200 |
| S | -1.82334800 | 0.31397000  | 0.95102800  |
| C | -3.48432600 | 0.53200000  | 0.29237600  |
| C | -3.75241700 | 1.56950400  | -0.60670500 |
| C | -5.04662800 | 1.75533700  | -1.08915600 |

|   |             |             |             |
|---|-------------|-------------|-------------|
| C | -6.07728100 | 0.91309000  | -0.67290600 |
| C | -5.81244100 | -0.11766000 | 0.22785500  |
| C | -4.51934700 | -0.30928300 | 0.71238200  |
| H | 0.58482500  | -4.21010000 | 3.17175700  |
| H | 1.77615200  | -2.67556400 | 4.72554300  |
| H | 2.34124700  | -0.36555800 | 3.98094700  |
| H | -0.01713000 | -3.44470100 | 0.90555800  |
| H | -1.35615600 | -0.37327000 | -1.32313000 |
| H | -1.61708100 | -1.77117600 | -0.25371400 |
| H | 1.08738100  | 2.20163700  | -1.95649200 |
| H | 1.70283300  | 4.47412200  | -2.71078600 |
| H | 2.88735000  | 6.01740500  | -1.17132700 |
| H | 3.45337300  | 5.27252400  | 1.12878400  |
| H | 2.83376600  | 2.98889700  | 1.87736300  |
| H | -0.89367100 | -2.73215700 | -2.00572000 |
| H | 0.13617500  | -4.16677600 | -3.69626100 |
| H | 2.59878600  | -4.17054100 | -4.01607400 |
| H | 4.01919800  | -2.70197200 | -2.59925700 |
| H | 2.99269500  | -1.26312400 | -0.89139100 |
| H | -2.95145900 | 2.22673700  | -0.92327000 |
| H | -5.24920100 | 2.56066600  | -1.78591000 |
| H | -7.08372100 | 1.06165500  | -1.04691800 |
| H | -6.61130100 | -0.77256300 | 0.55644500  |
| H | -4.31102000 | -1.10718600 | 1.41498700  |

## 6. Reference

1. Wang YM, Wu J, Hoong C, et al. *J Am Chem Soc*, 2012, 134: 12928-12931;
2. M. J. Frisch, G. W. Trucks, H. B. Schlegel, G. E. Scuseria, M. A. Robb, J. R. Cheeseman, G. Scalmani, V. Barone, B. Mennucci, G. A. Petersson, H. Nakatsuji, M. Caricato, X. Li, H. P. Hratchian, A. F.

Izmaylov, J. Bloino, G. Zheng, J. L. Sonnenberg, M. Hada, M. Ehara, K. Toyota, R. Fukuda, J. Hasegawa, M. Ishida, T. Nakajima, Y. Honda, O. Kitao, H. Nakai, T. Vreven, J. A. Montgomery, Jr., J. E. Peralta, F. Ogliaro, M. Bearpark, J. J. Heyd, E. Brothers, K. N. Kudin, V. N. Staroverov, T. Keith, R. Kobayashi, J. Normand, K. Raghavachari, A. Rendell, J. C. Burant, S. S. Iyengar, J. Tomasi, M. Cossi, N. Rega, J. M. Millam, M. Klene, J. E. Knox, J. B. Cross, V. Bakken, C. Adamo, J. Jaramillo, R. Gomperts, R. E. Stratmann, O. Yazyev, A. J. Austin, R. Cammi, C. Pomelli, J. W. Ochterski, R. L. Martin, K. Morokuma, V. G. Zakrzewski, G. A. Voth, P. Salvador, J. J. Dannenberg, S. Dapprich, A. D. Daniels, O. Farkas, J. B. Foresman, J. V. Ortiz, J. Cioslowski, and D. J. Fox, Gaussian, Inc., Wallingford CT, 2010.

3. Legault, C. Y. CYLview, 1.0b; Université de Sherbrooke, 2009; <http://www.cylview.org>.

## 7. NMR Spectra of Product

### 2,4-diphenyl-4-((phenylthio)methyl)-4H-benzo[d][1,3]oxazine (3aa)

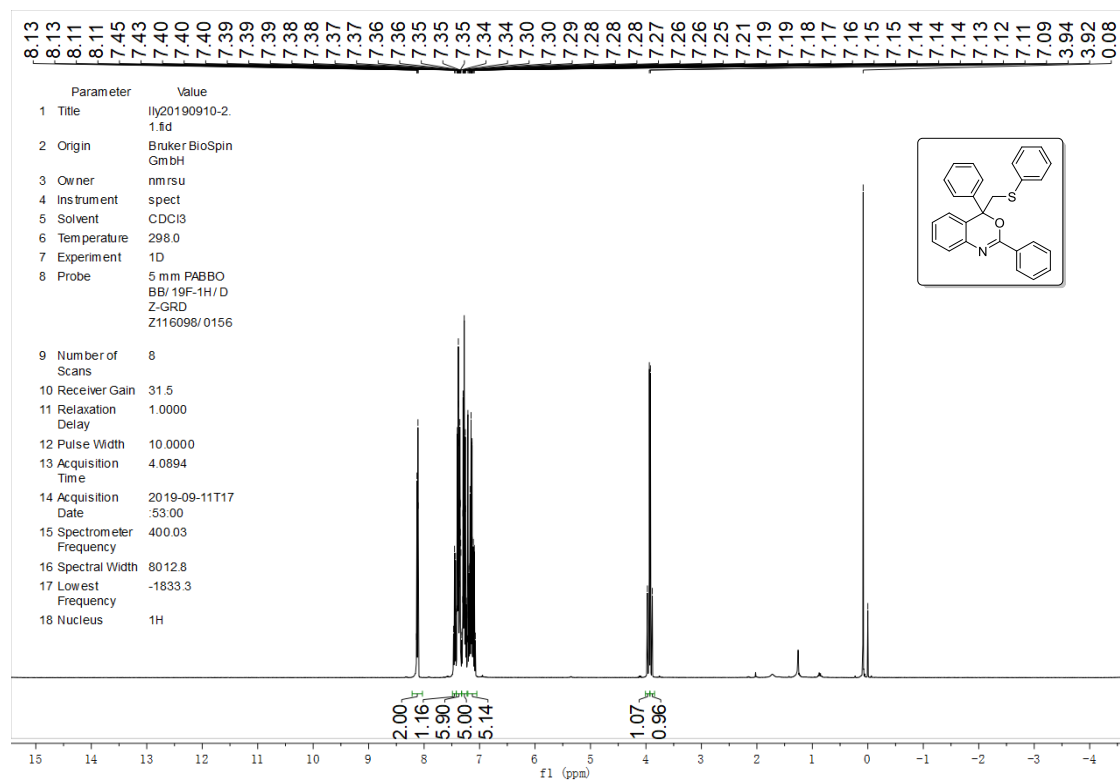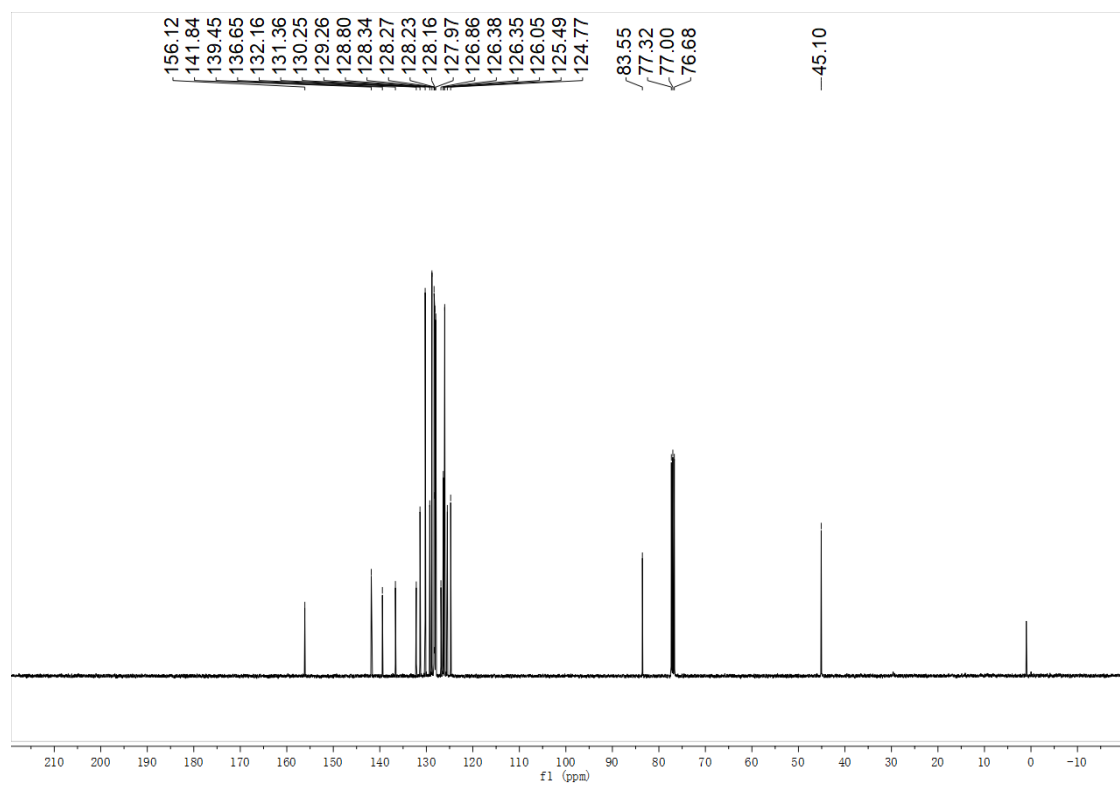

# 6-fluoro-2,4-diphenyl-4-((phenylthio)methyl)-4H-benzo[d][1,3]oxazine (3ba)

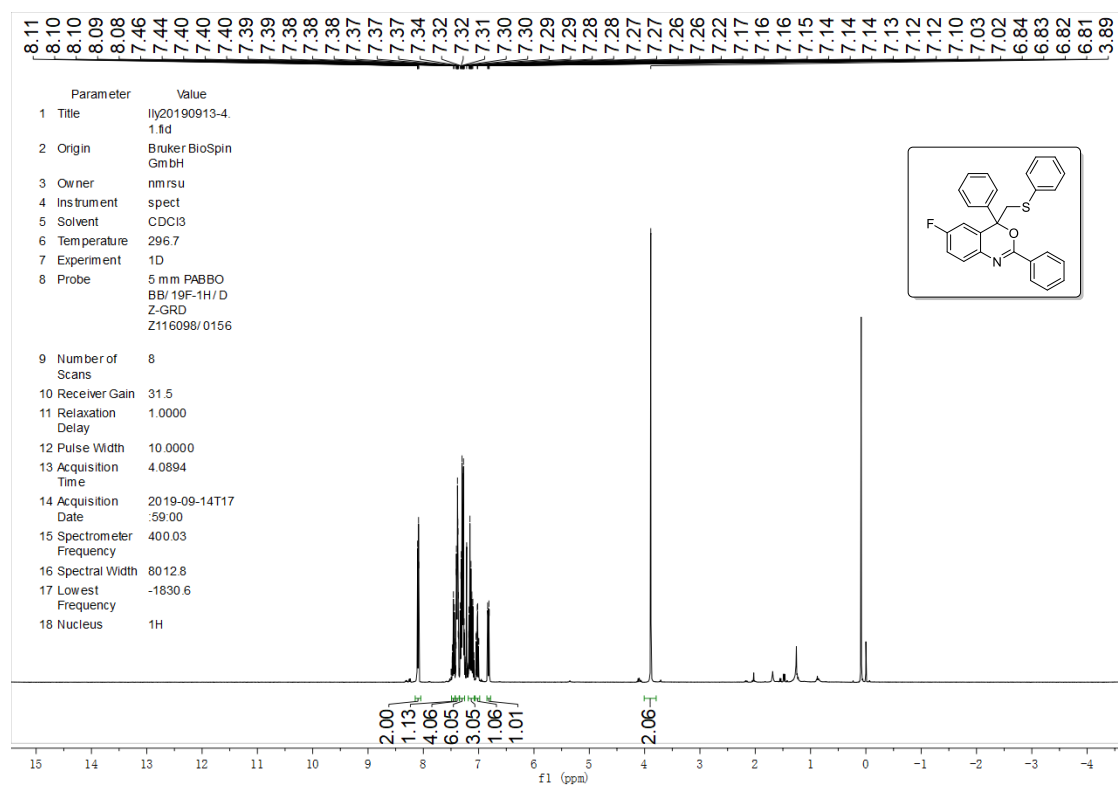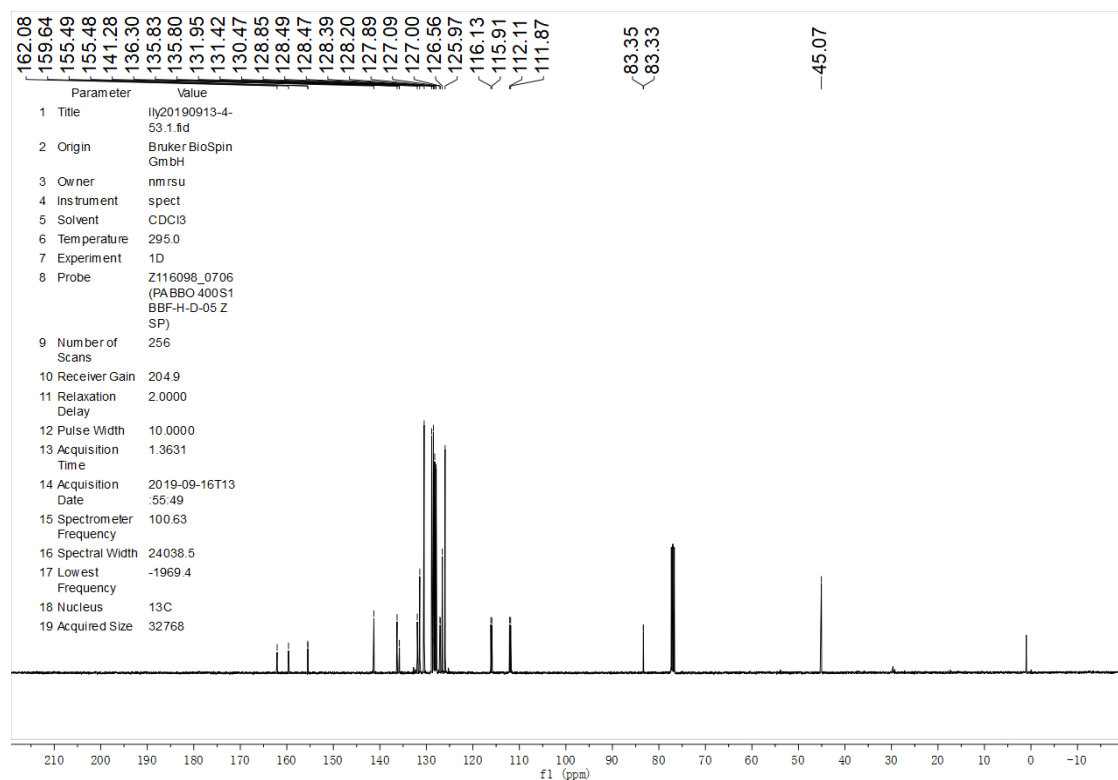

| Parameter                 | Value                                              |
|---------------------------|----------------------------------------------------|
| 1 Title                   | lly20190913-4.2.fid                                |
| 2 Origin                  | Bruker BioSpin GmbH                                |
| 3 Owner                   | nmrsu                                              |
| 4 Instrument              | spect                                              |
| 5 Solvent                 | CDCl3                                              |
| 6 Temperature             | 296.8                                              |
| 7 Experiment              | 1D                                                 |
| 8 Probe                   | 5 mm PABBO<br>BB/19F-1H/D<br>Z-GRD<br>Z116098/0156 |
| 9 Number of Scans         | 16                                                 |
| 10 Receiver Gain          | 207.2                                              |
| 11 Relaxation Delay       | 1.0000                                             |
| 12 Pulse Width            | 14.0000                                            |
| 13 Acquisition Time       | 0.7340                                             |
| 14 Acquisition Date       | 2019-09-14T18:34:00                                |
| 15 Spectrometer Frequency | 376.37                                             |
| 16 Spectral Width         | 89285.7                                            |
| 17 Lowest Frequency       | -82283.1                                           |
| 18 Nucleus                | 19F                                                |

-114.29

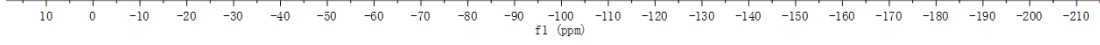

**6-chloro-2,4-diphenyl-4-((phenylthio)methyl)-4H-benzo[d][1,3]oxazine (3ca)**

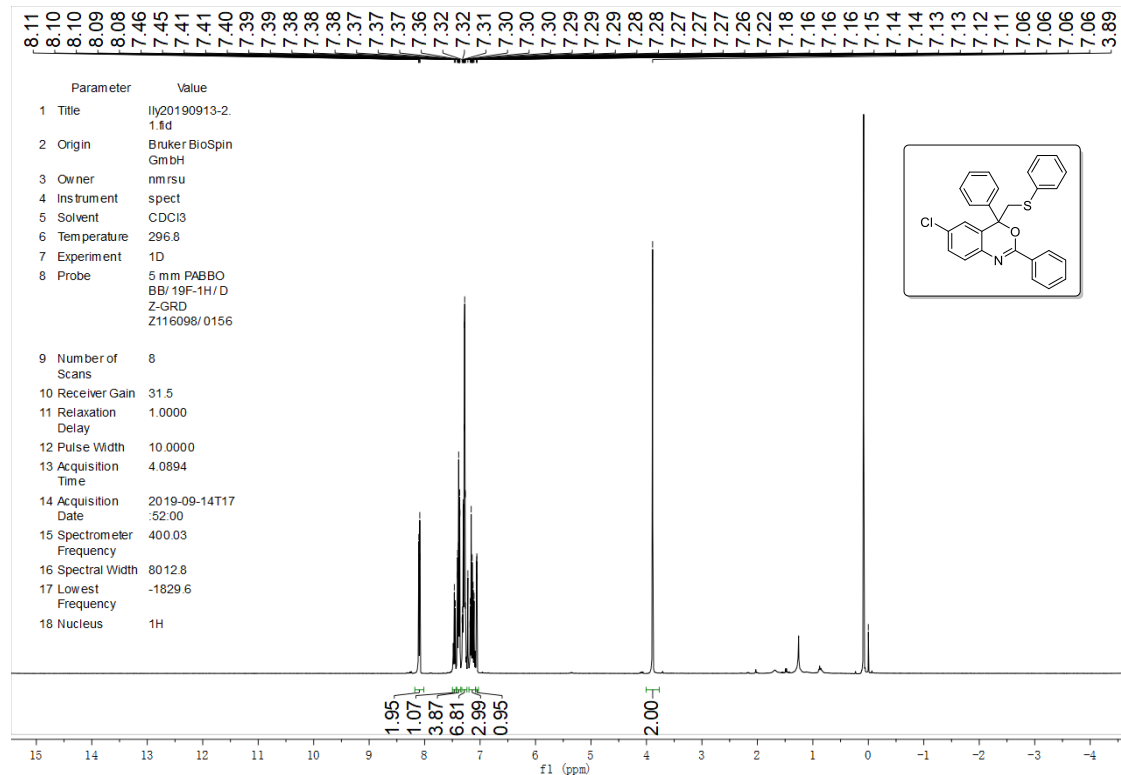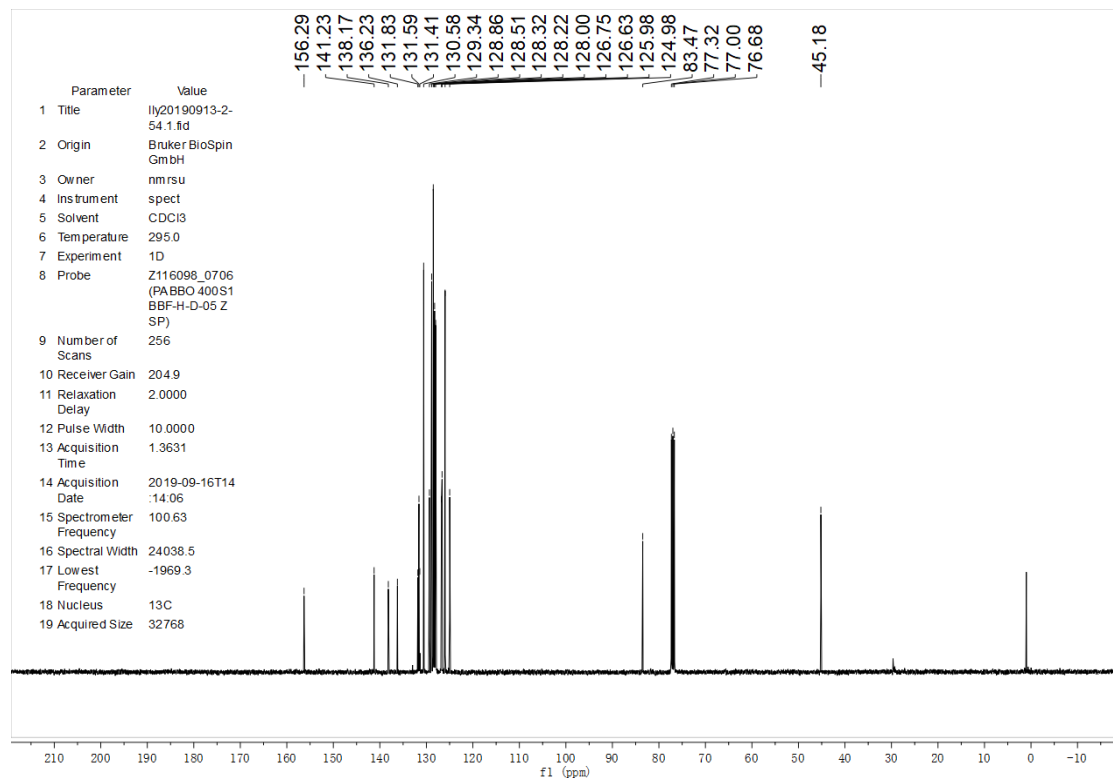



# 6-bromo-2,4-diphenyl-4-((phenylthio)methyl)-4H-benzo[d][1,3]oxazine (3da)

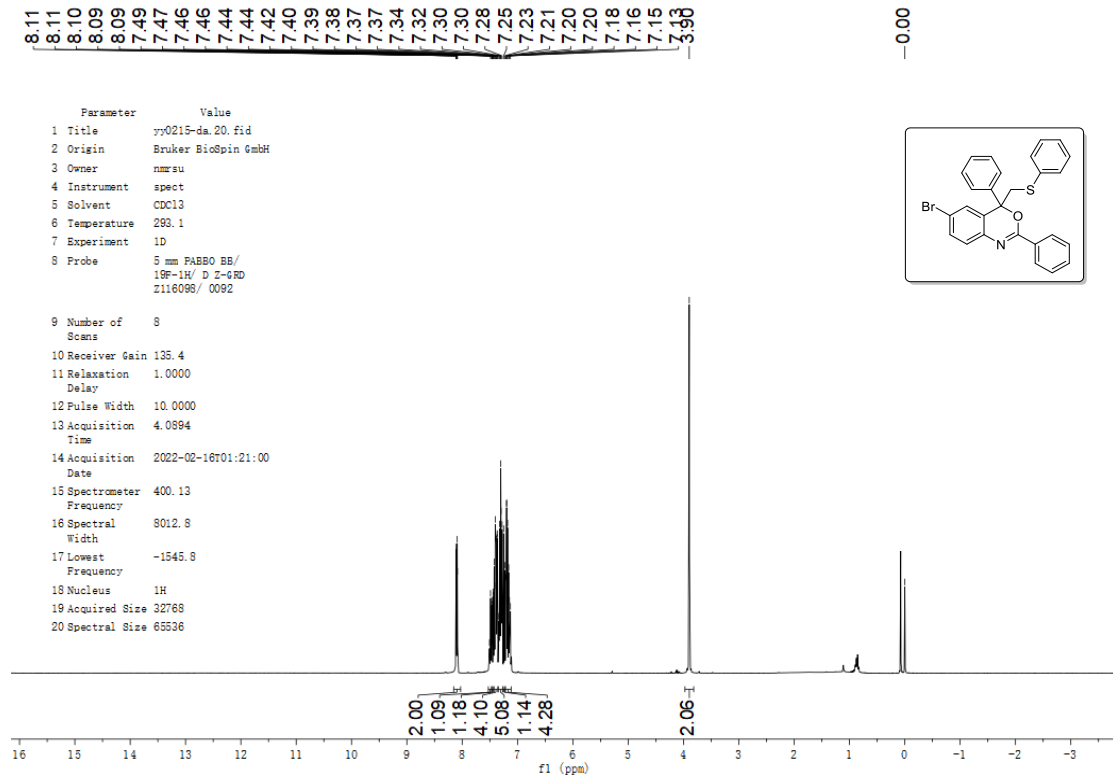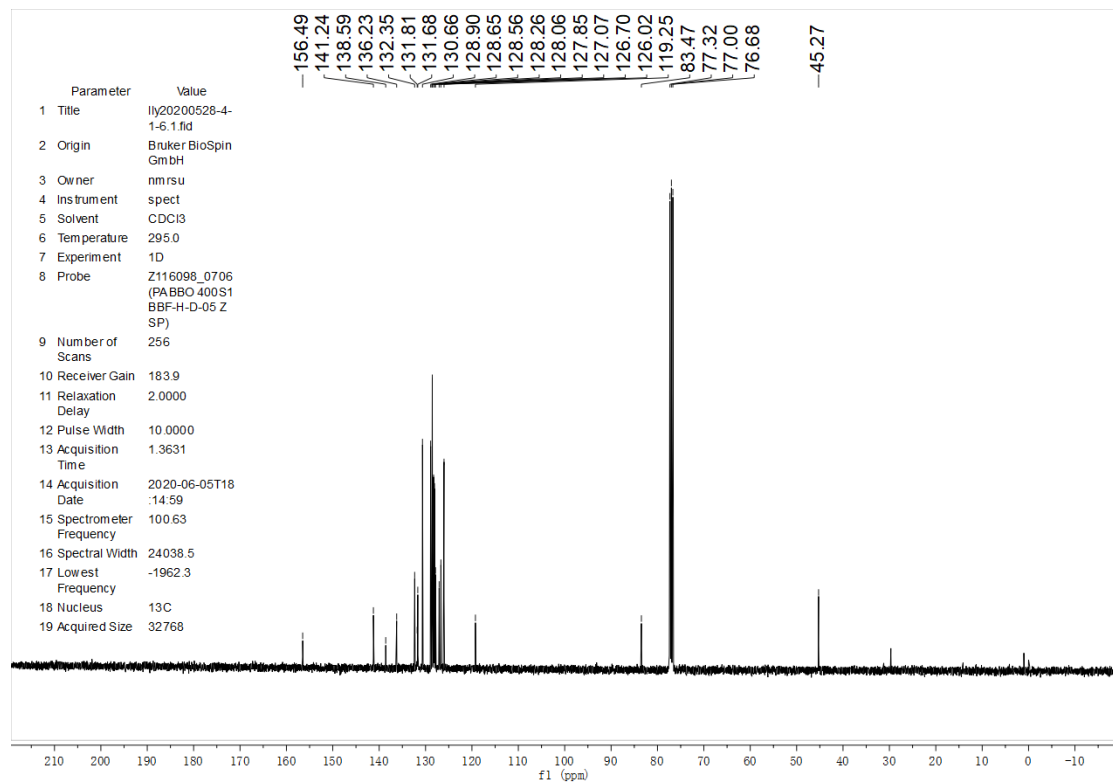

# 6-nitro-2,4-diphenyl-4-((phenylthio)methyl)-4H-benzo[d][1,3]oxazine (3ea)

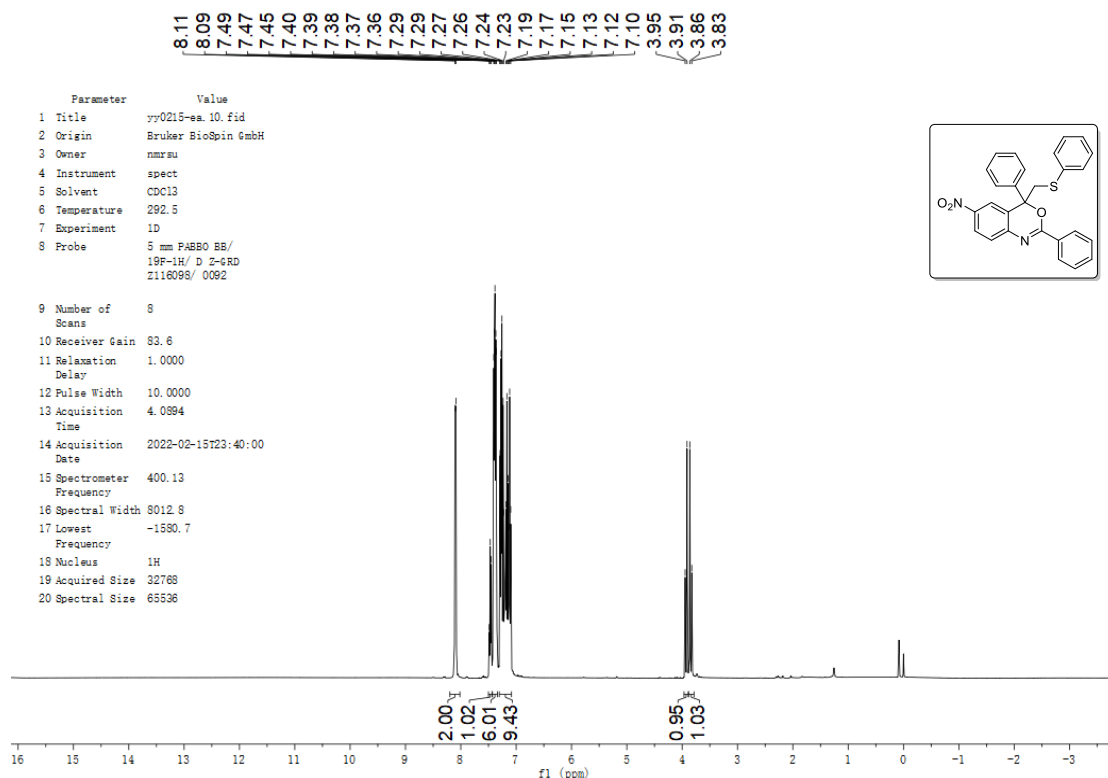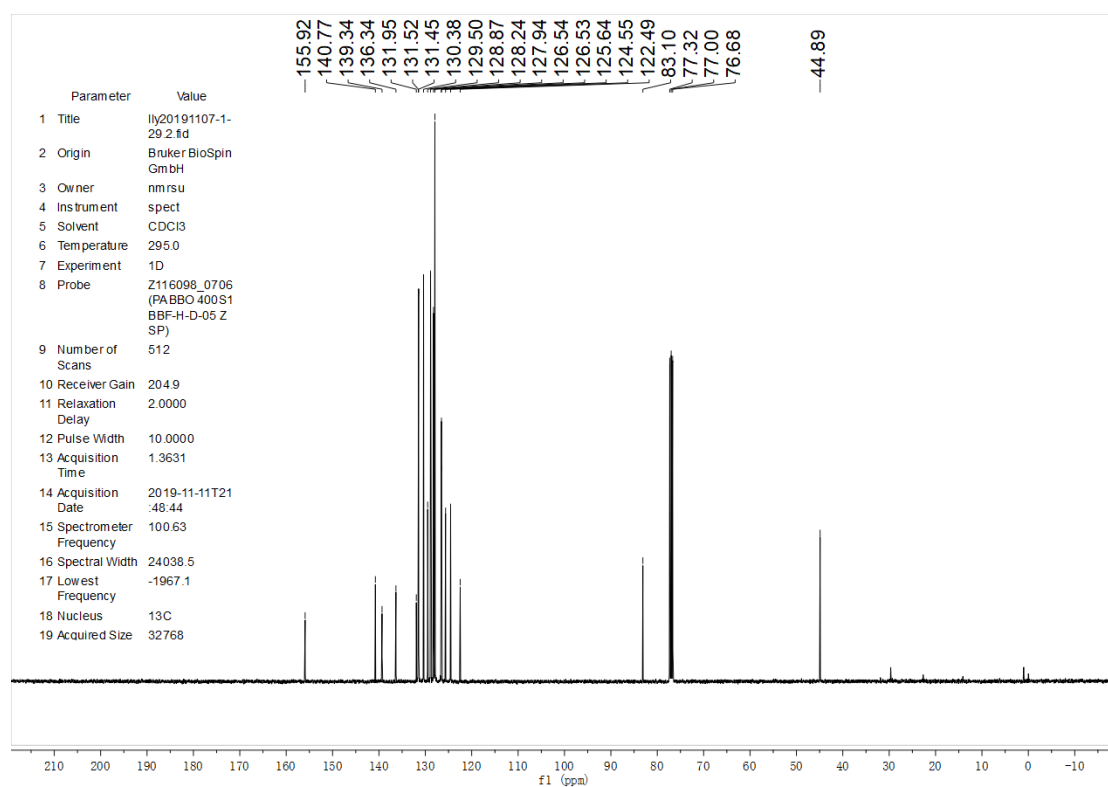

### 6-methoxy-2,4-diphenyl-4-((phenylthio)methyl)-4H-benzo[d][1,3]oxazine (3fa)

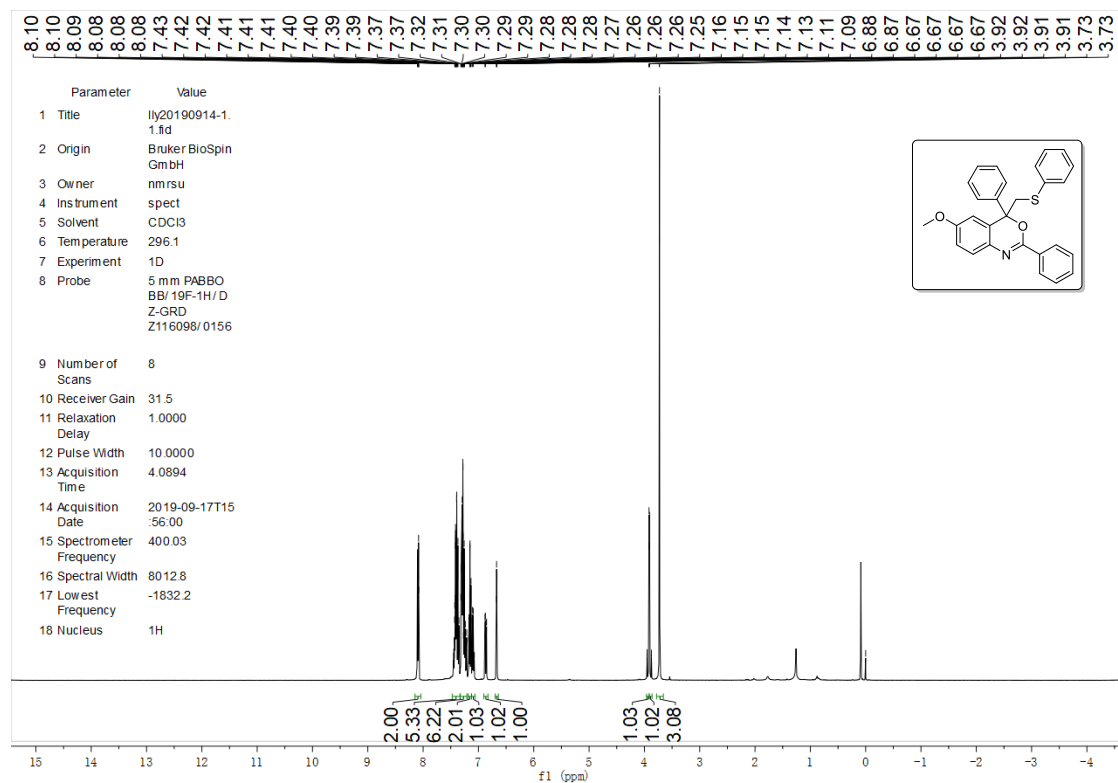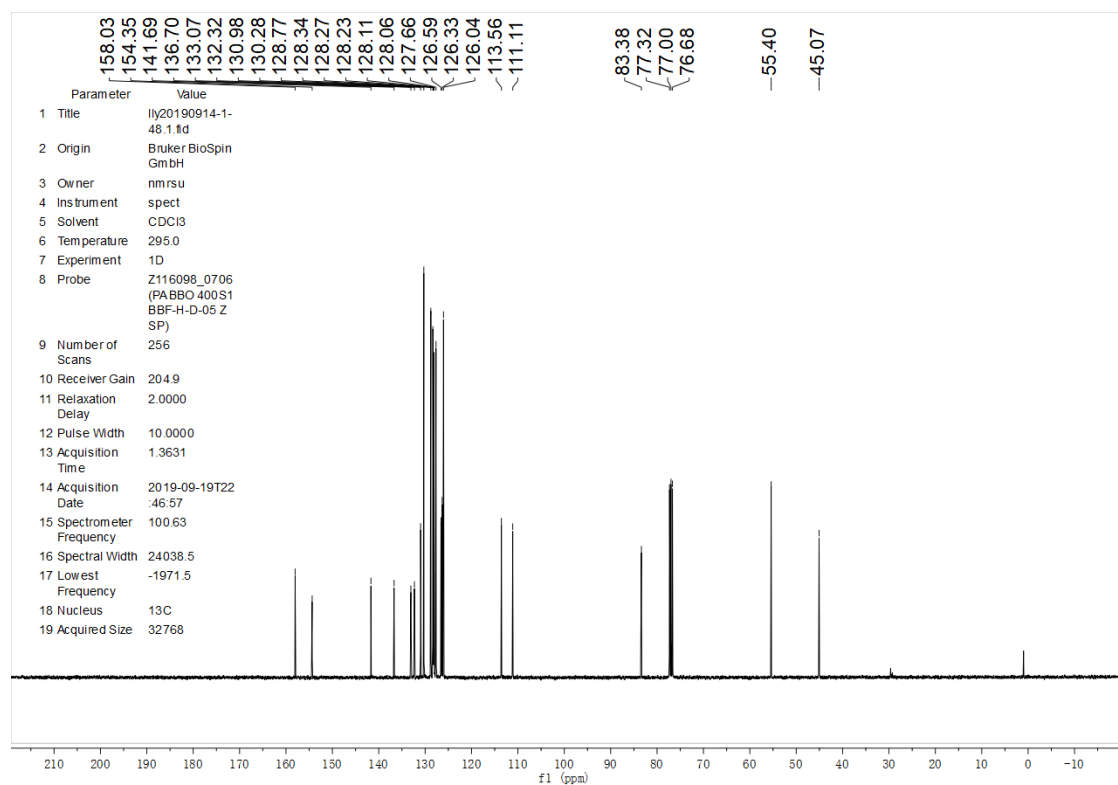

**6-methyl-2,4-diphenyl-4-((phenylthio)methyl)-4H-benzo[d][1,3]oxazine (3ga)**

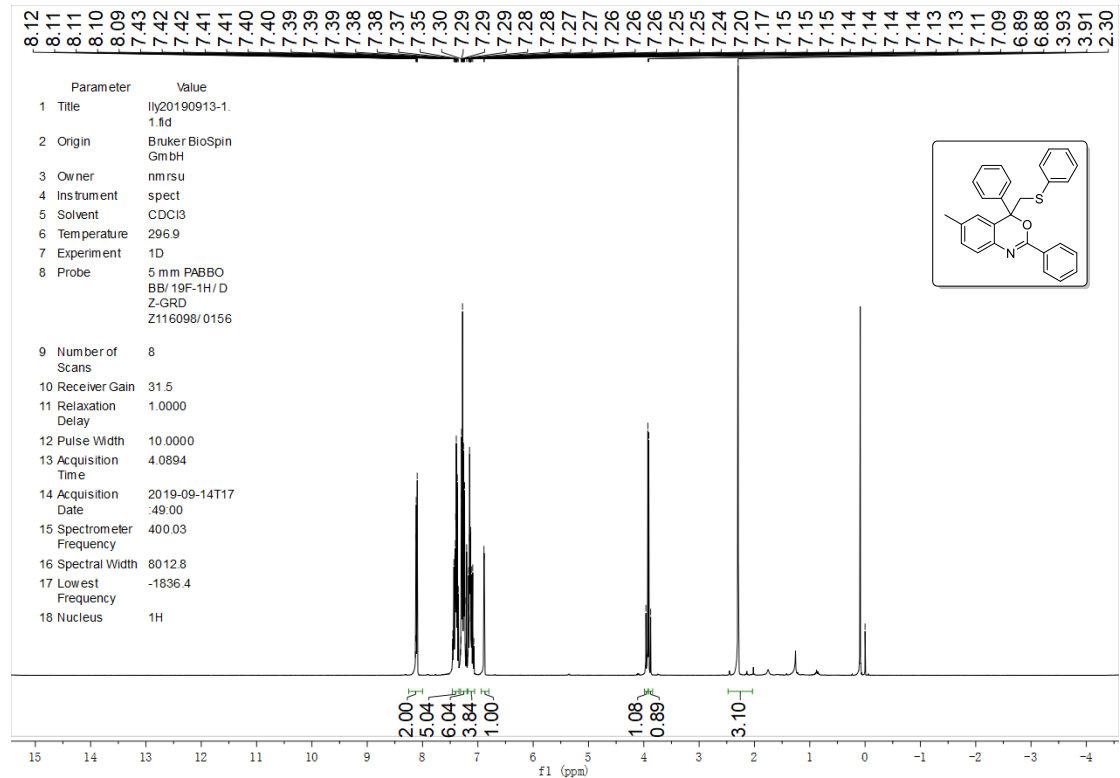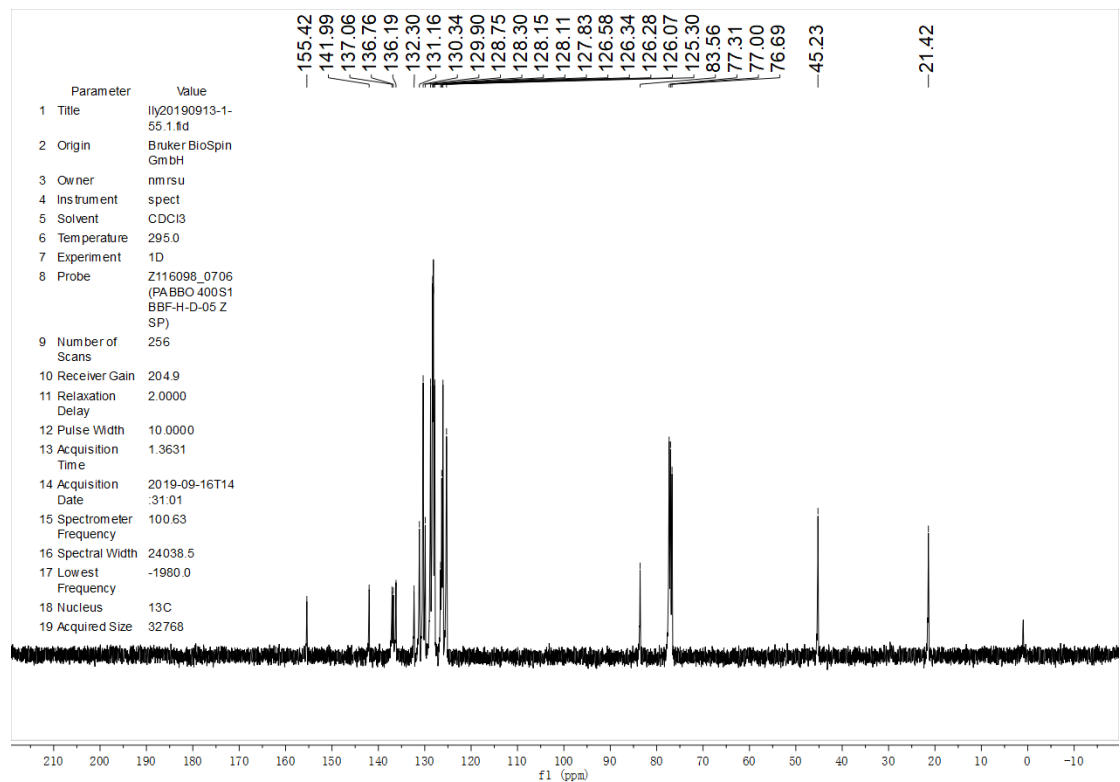

# 6-butyl-2,4-diphenyl-4-((phenylthio)methyl)-4H-benzo[d][1,3]oxazine (3ha)

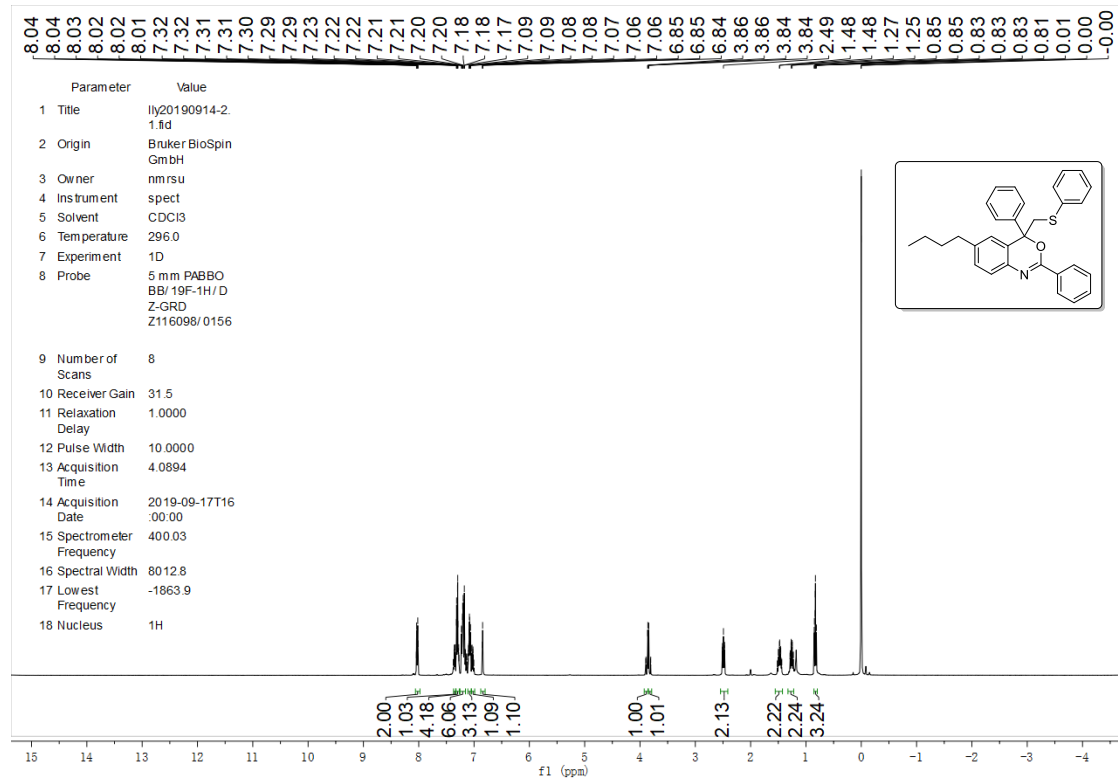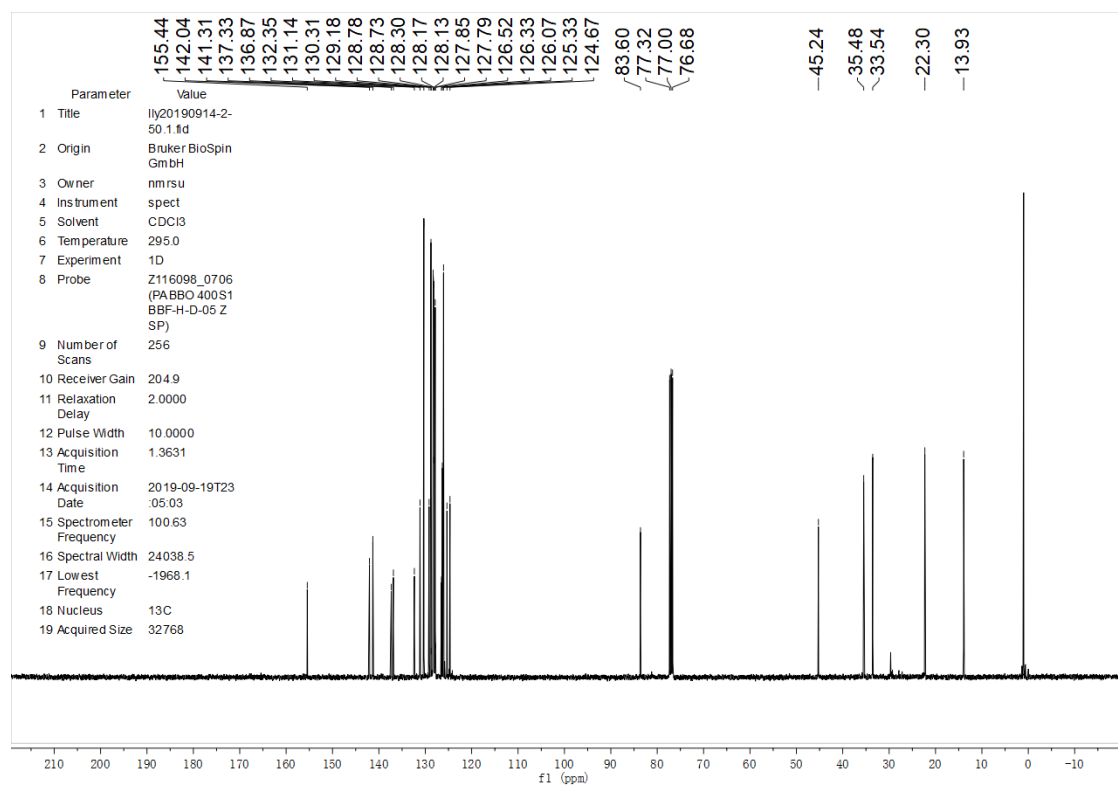

**6-(tert-butyl)-2,4-diphenyl-4-((phenylthio)methyl)-4H-benzo[d][1,3]oxazine (3ia)**

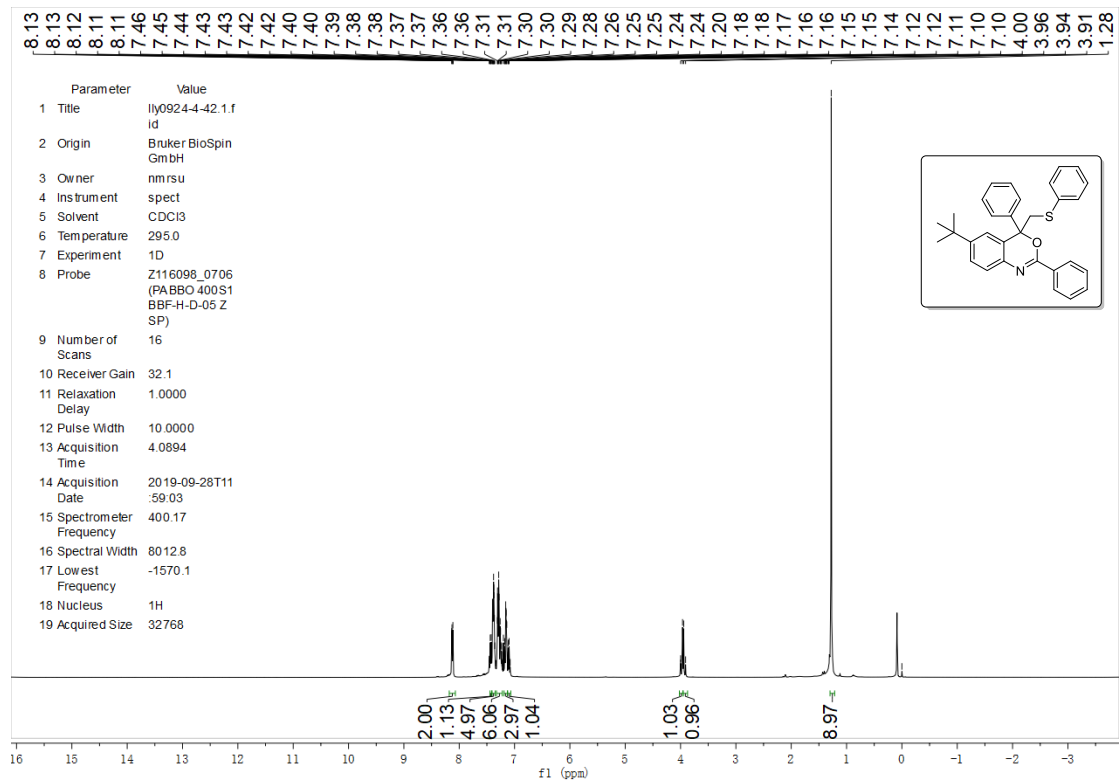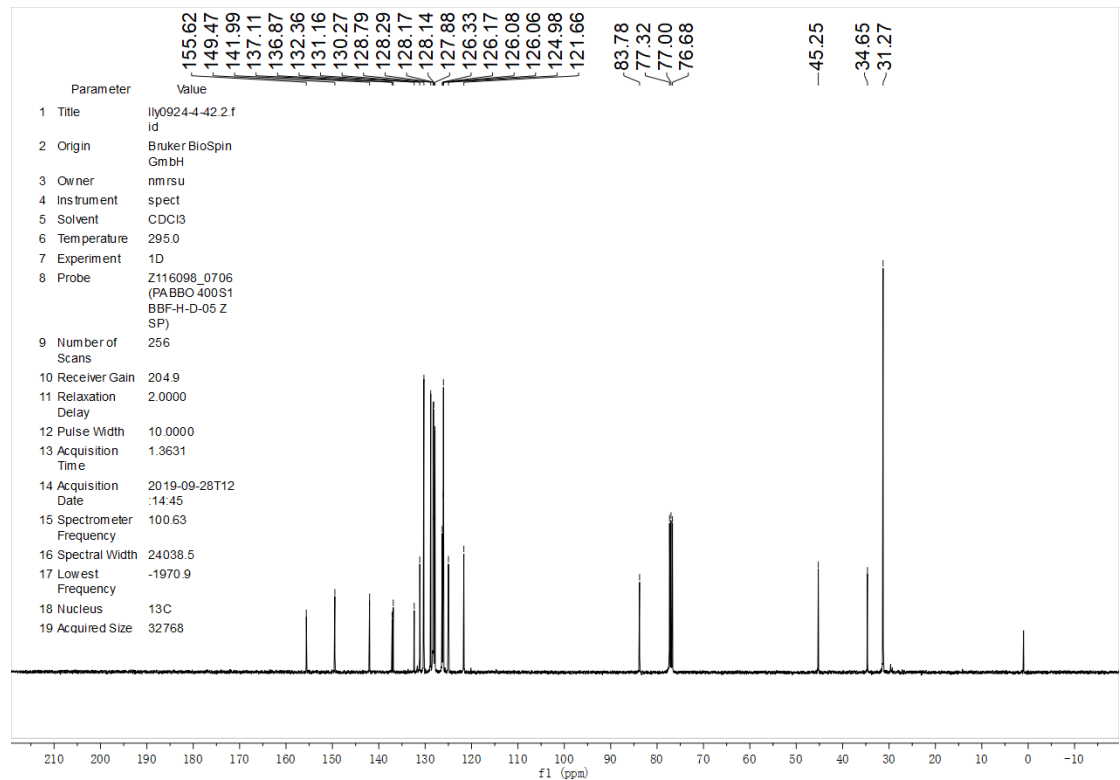

# 8-methyl-2,4-diphenyl-4-((phenylthio)methyl)-4H-benzo[d][1,3]oxazine (3ja)

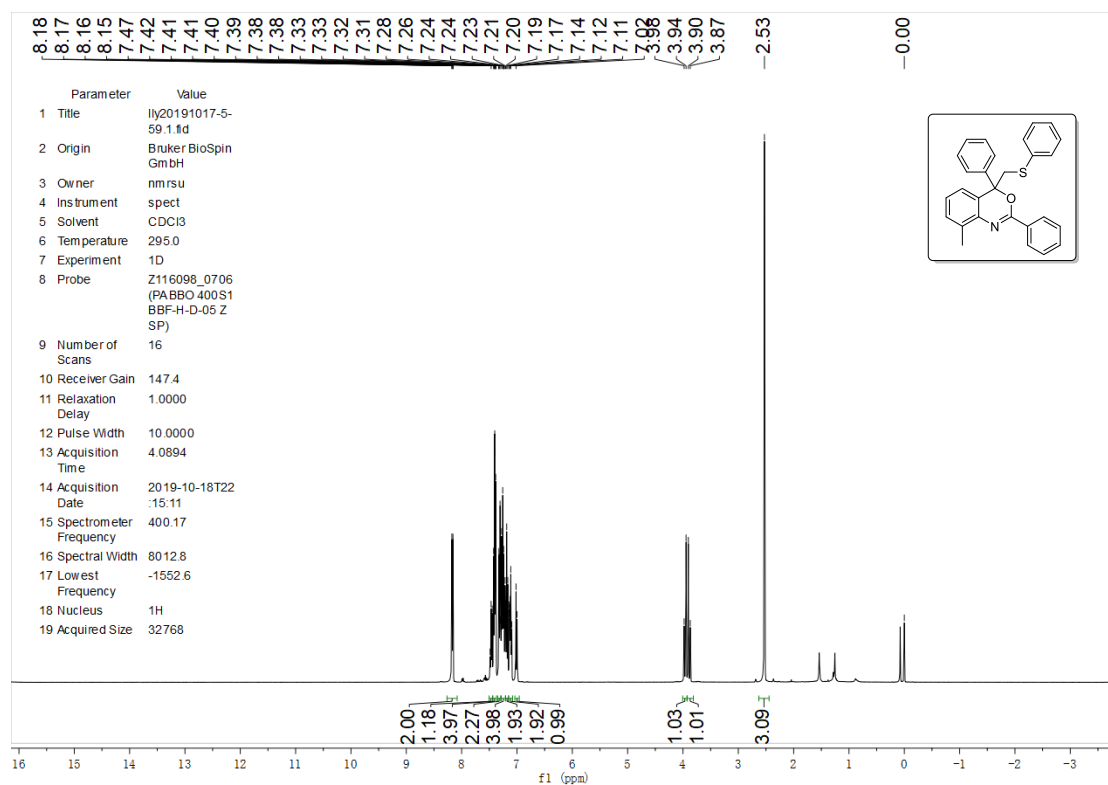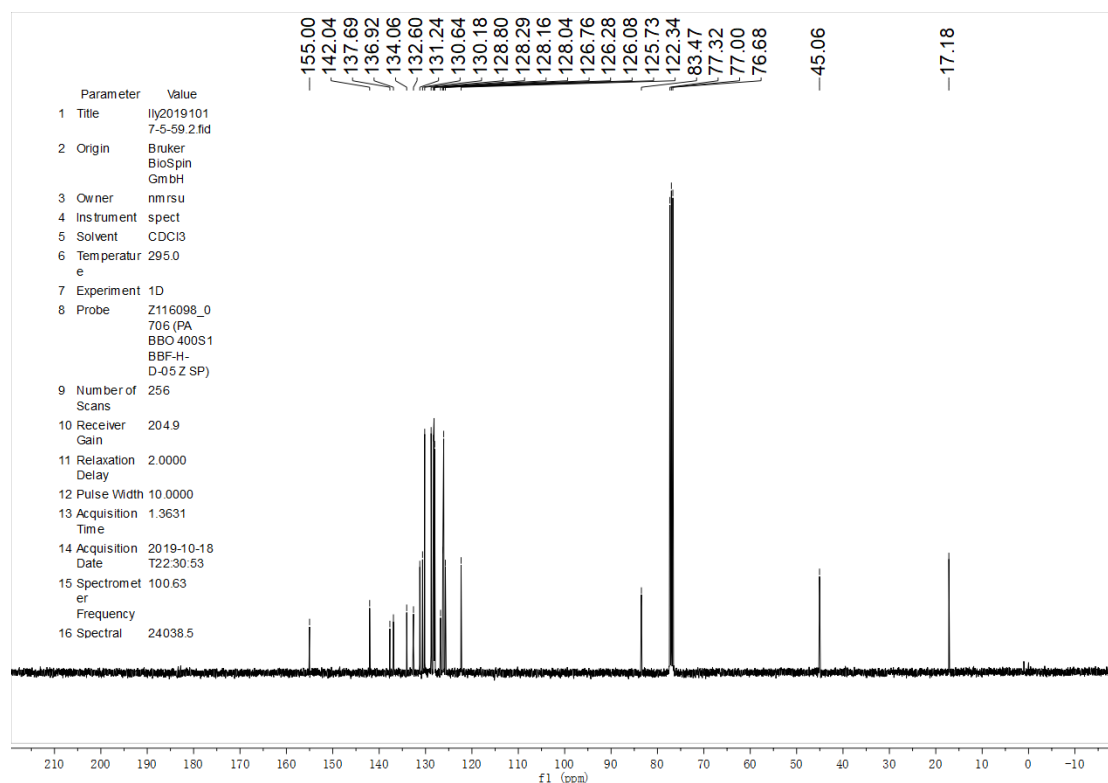

### 4-(4-fluorophenyl)-2-phenyl-4-((phenylthio)methyl)-4H-benzo[d][1,3]oxazine (3ka)

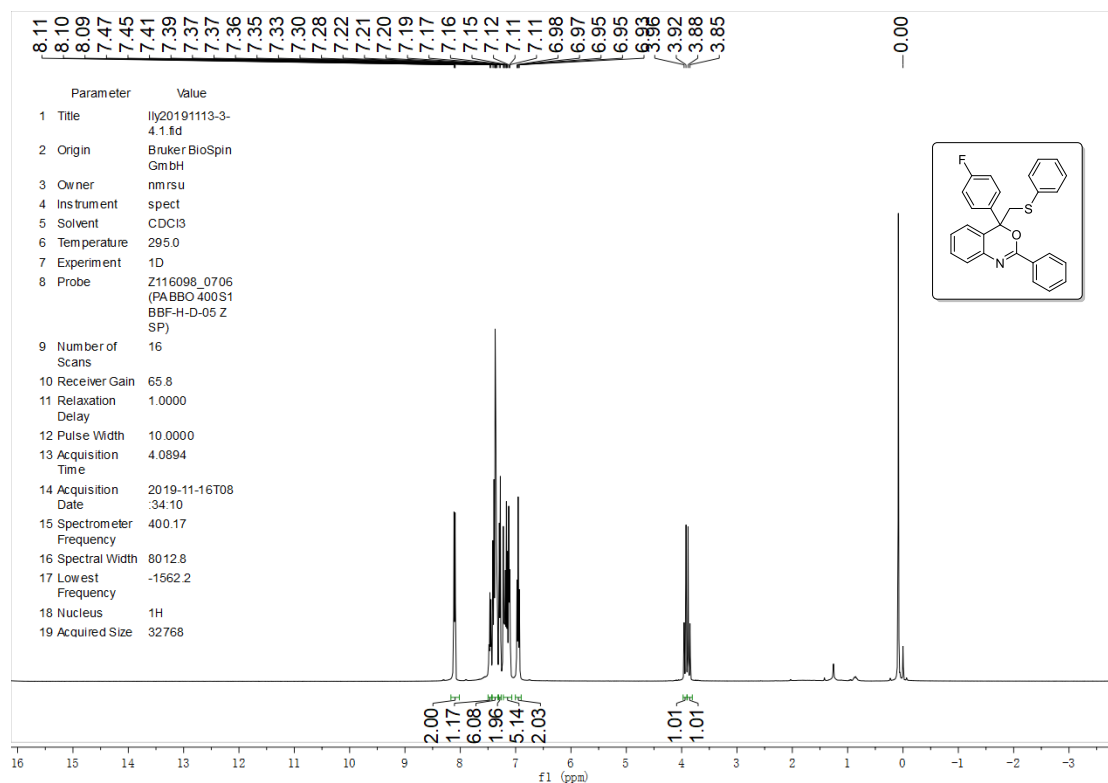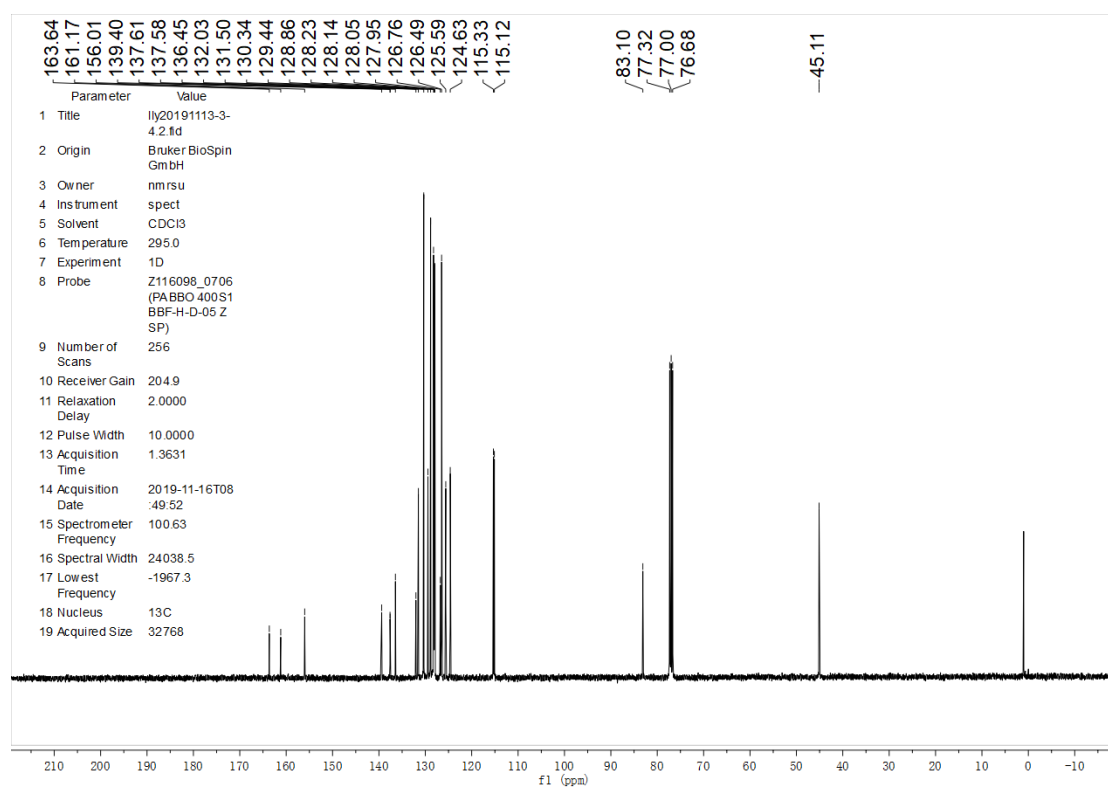



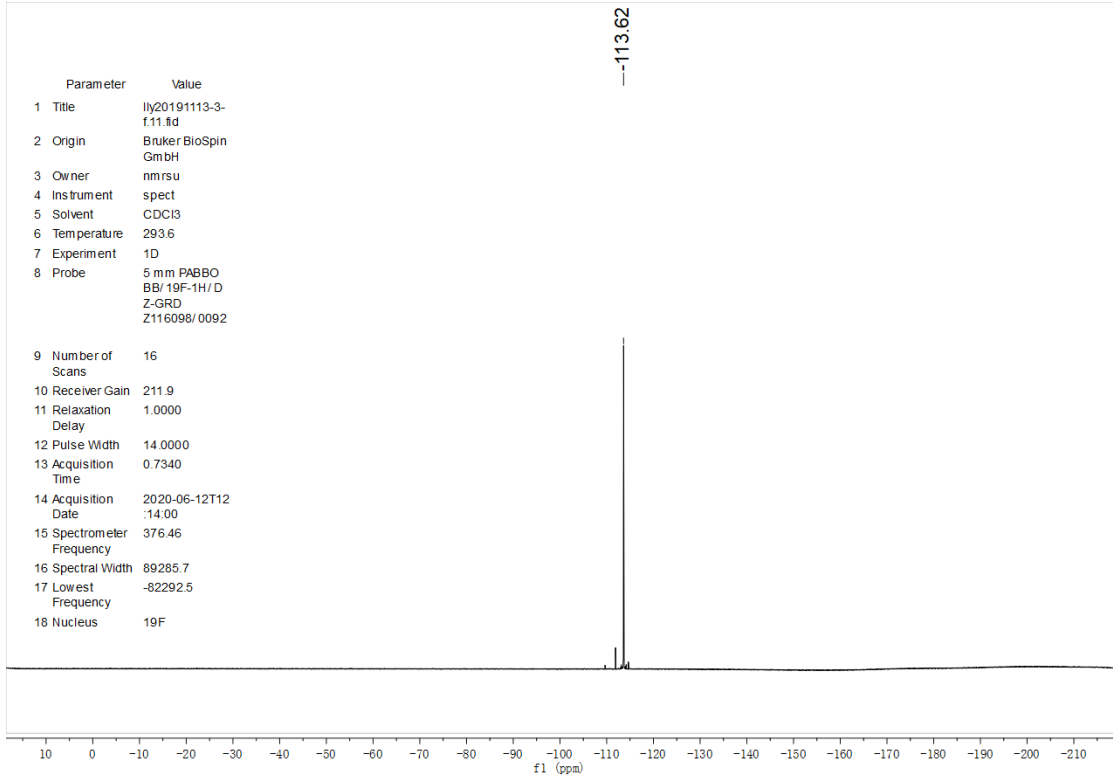

**4-(4-chlorophenyl)-2-phenyl-4-((phenylthio)methyl)-4H-benzo[d][1,3]oxazine (3ma)**

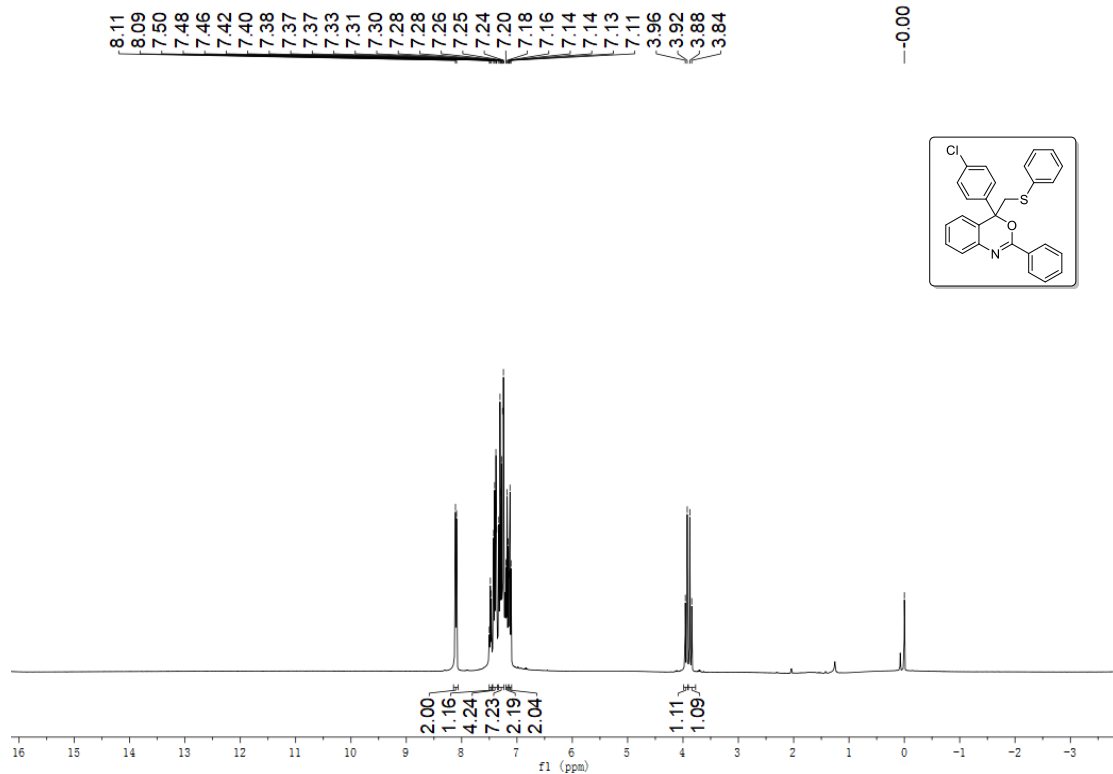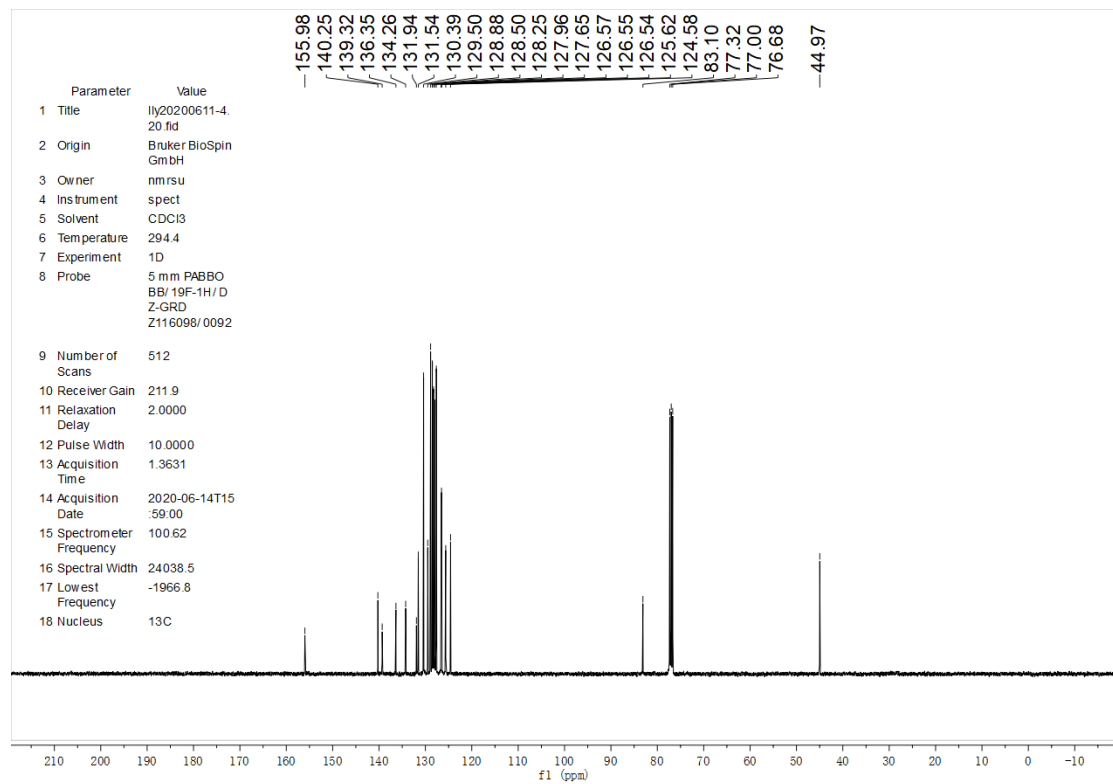

### 4-(4-bromophenyl)-2-phenyl-4-((phenylthio)methyl)-4H-benzo[d][1,3]oxazine (3na)

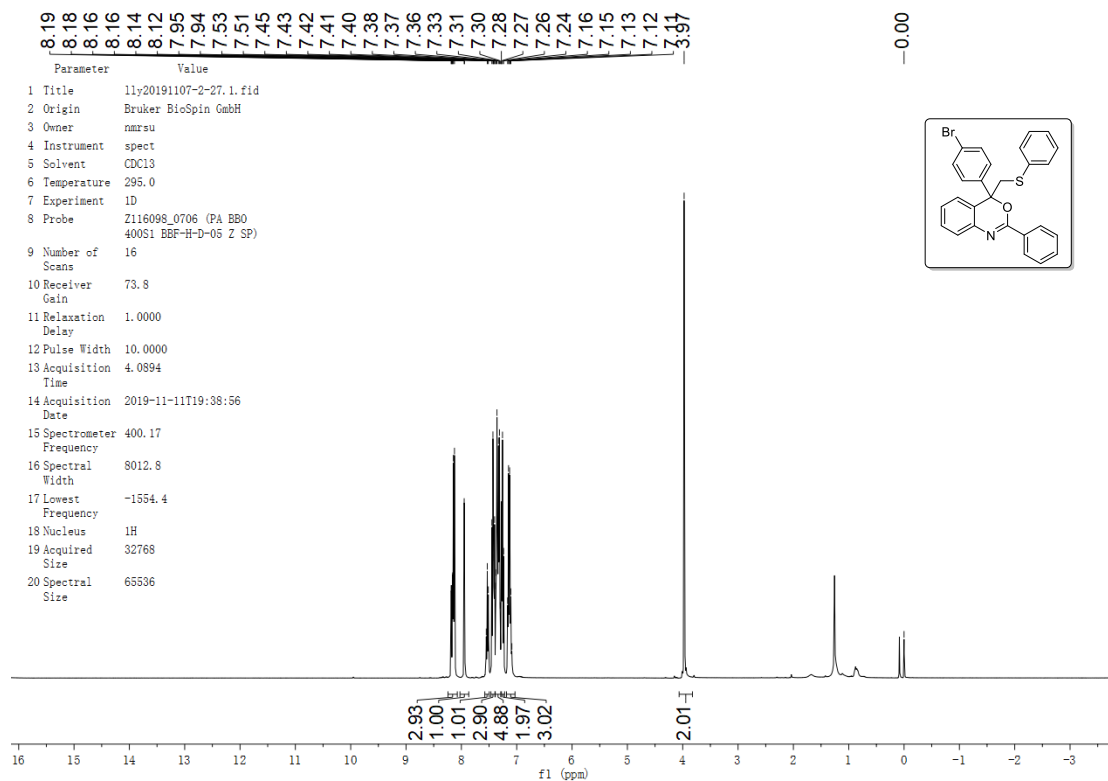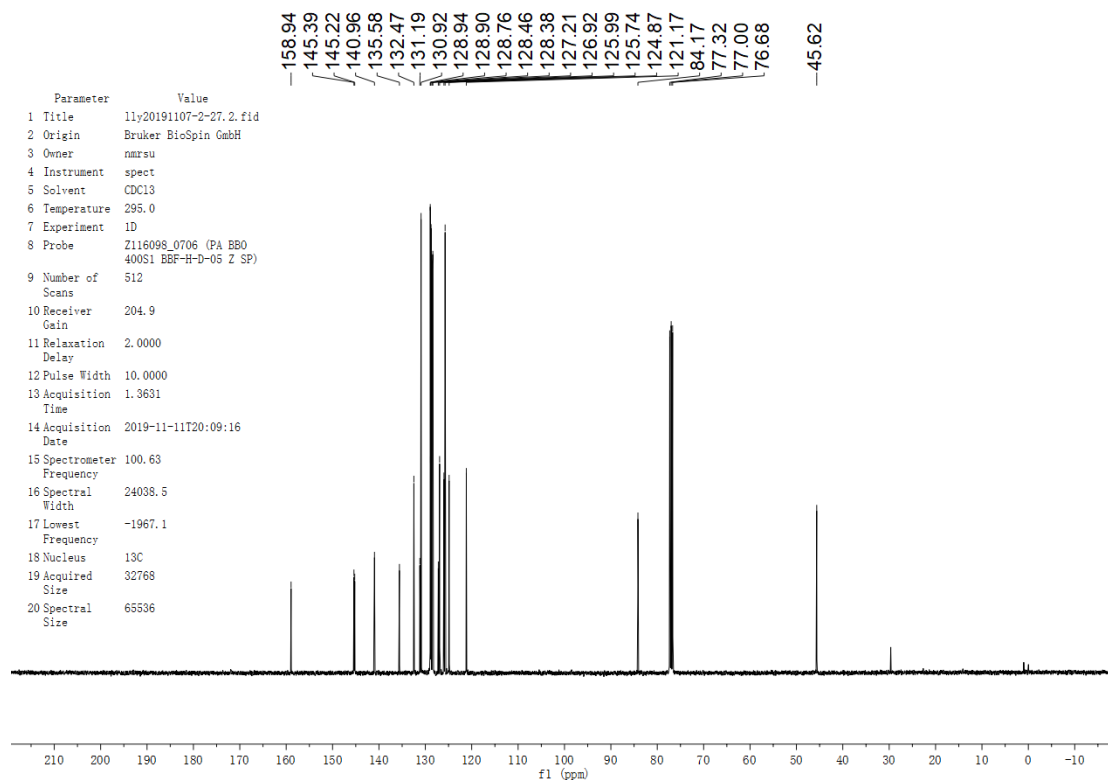

**2-phenyl-4-((phenylthio)methyl)-4-(p-tolyl)-4H-benzo[d][1,3]oxazine (30a)**

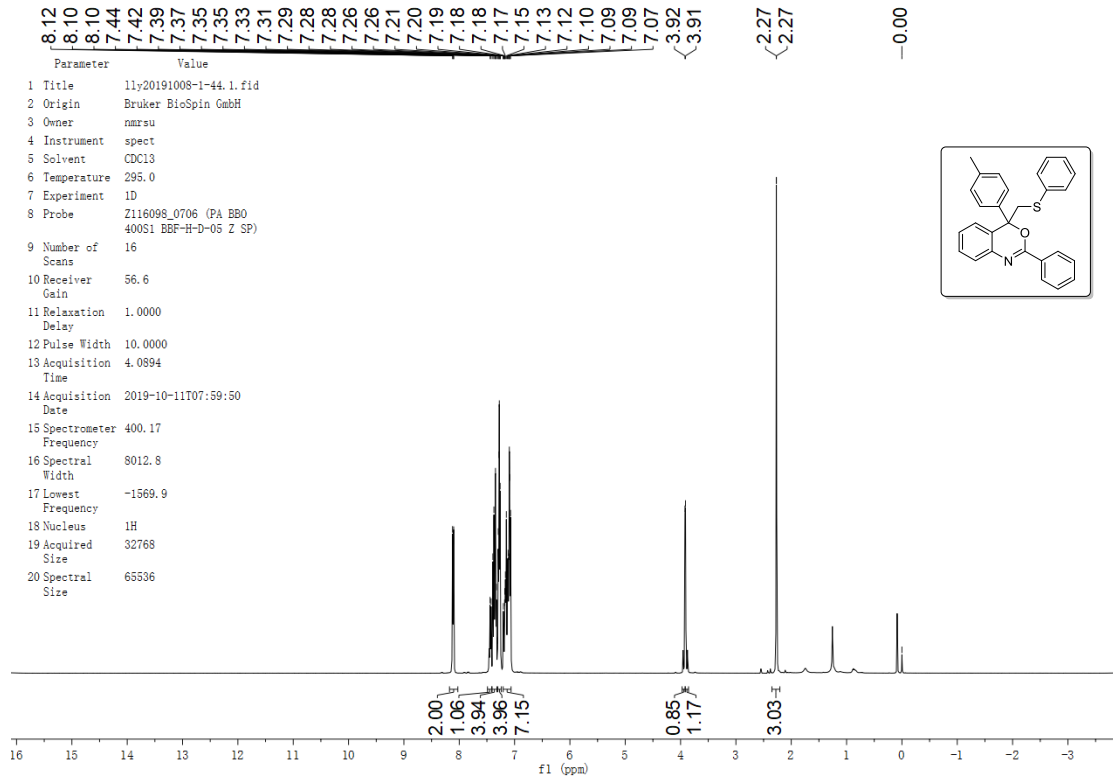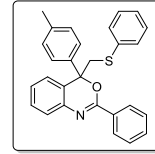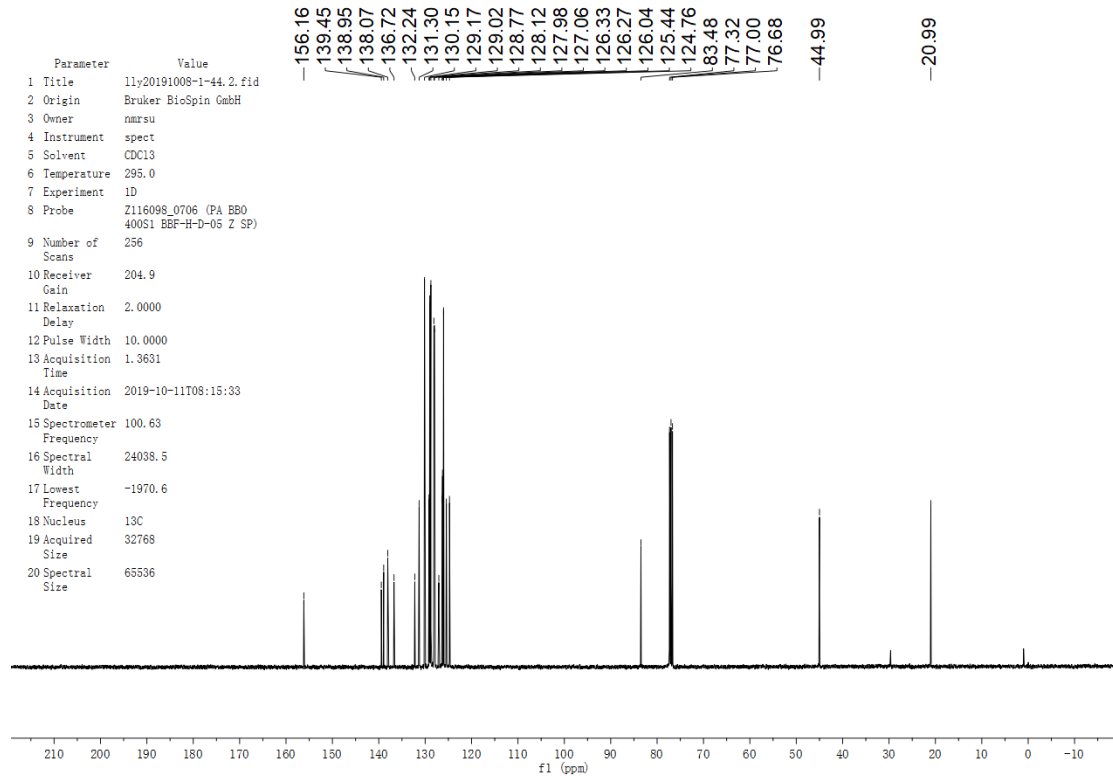

### 4-phenyl-4-((phenylthio)methyl)-2-(p-tolyl)-4H-benzo[d][1,3]oxazine (3pa)

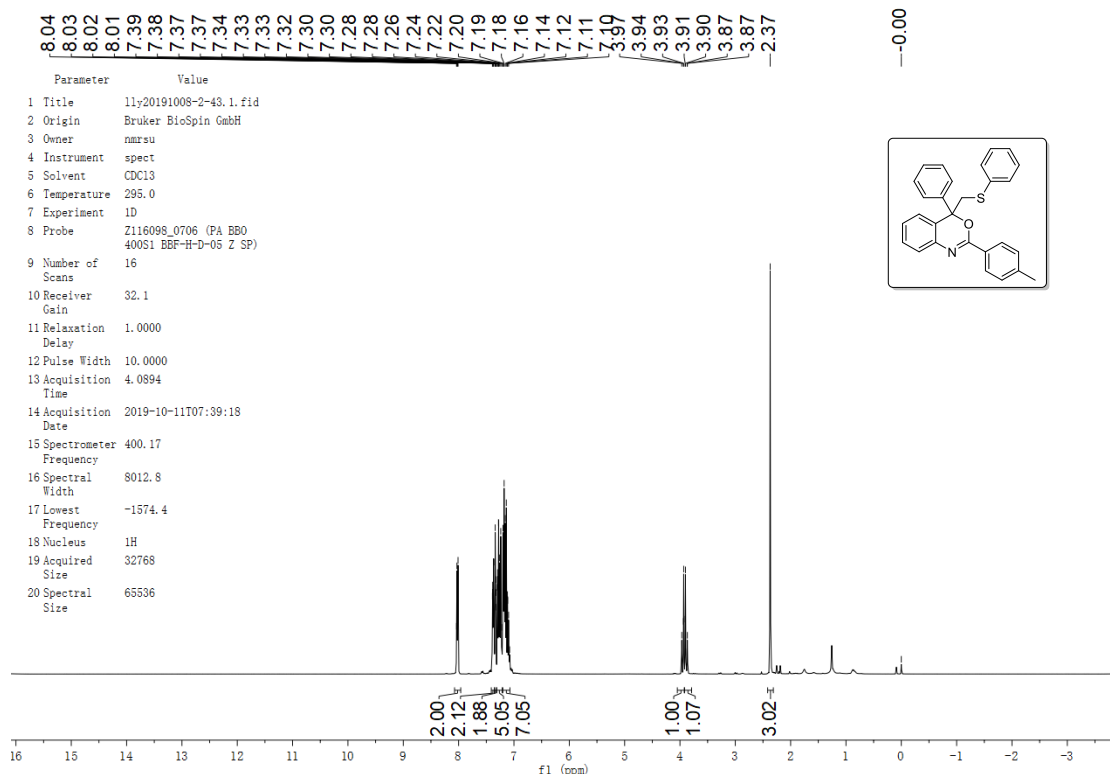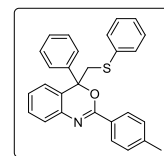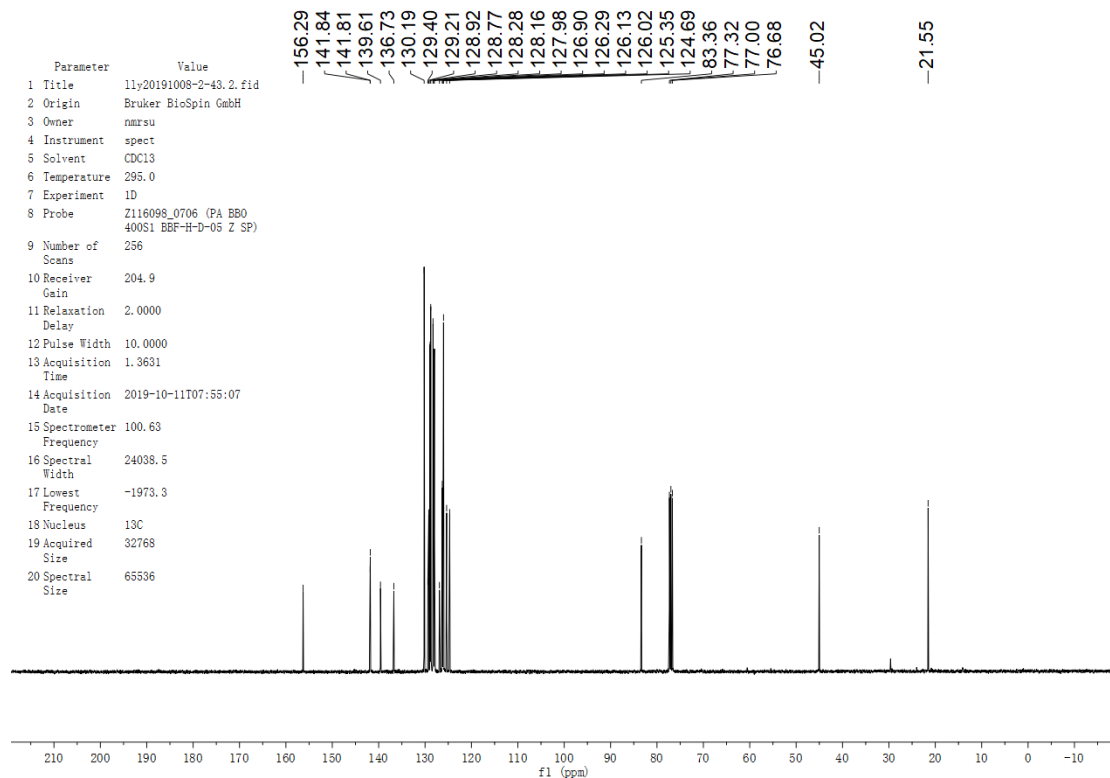

## 2-methyl-4-phenyl-4-((phenylthio)methyl)-4H-benzo[d][1,3]oxazine (3qa)

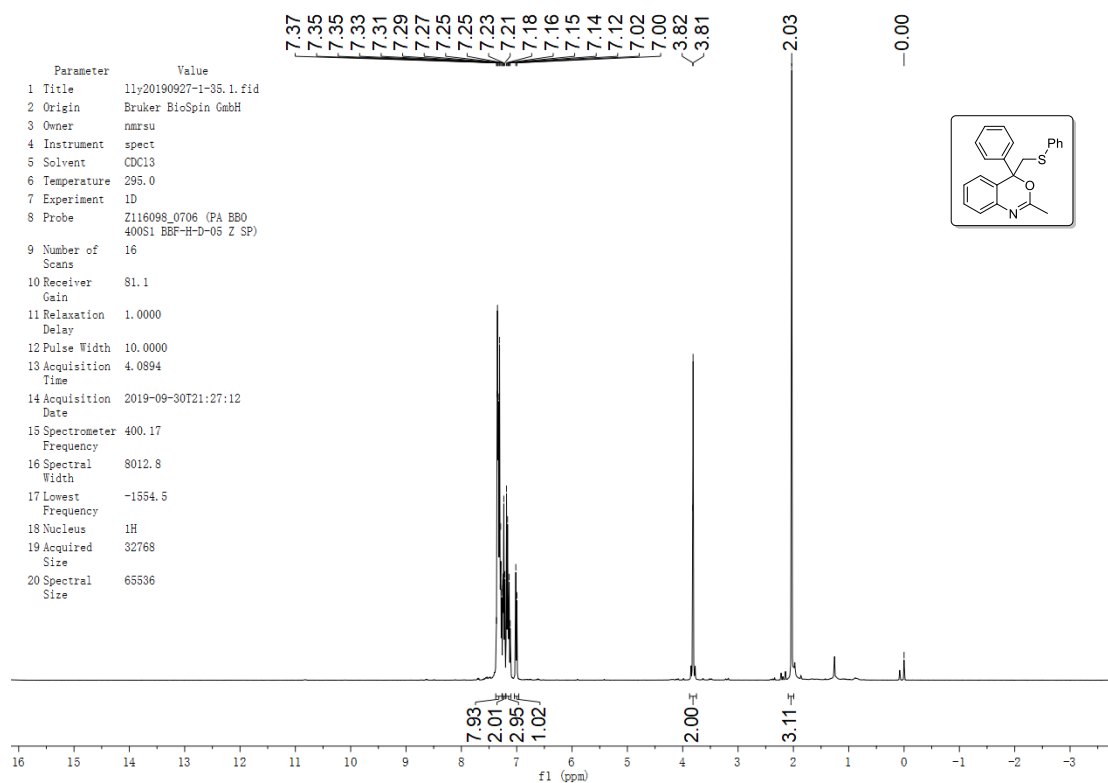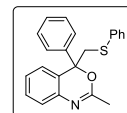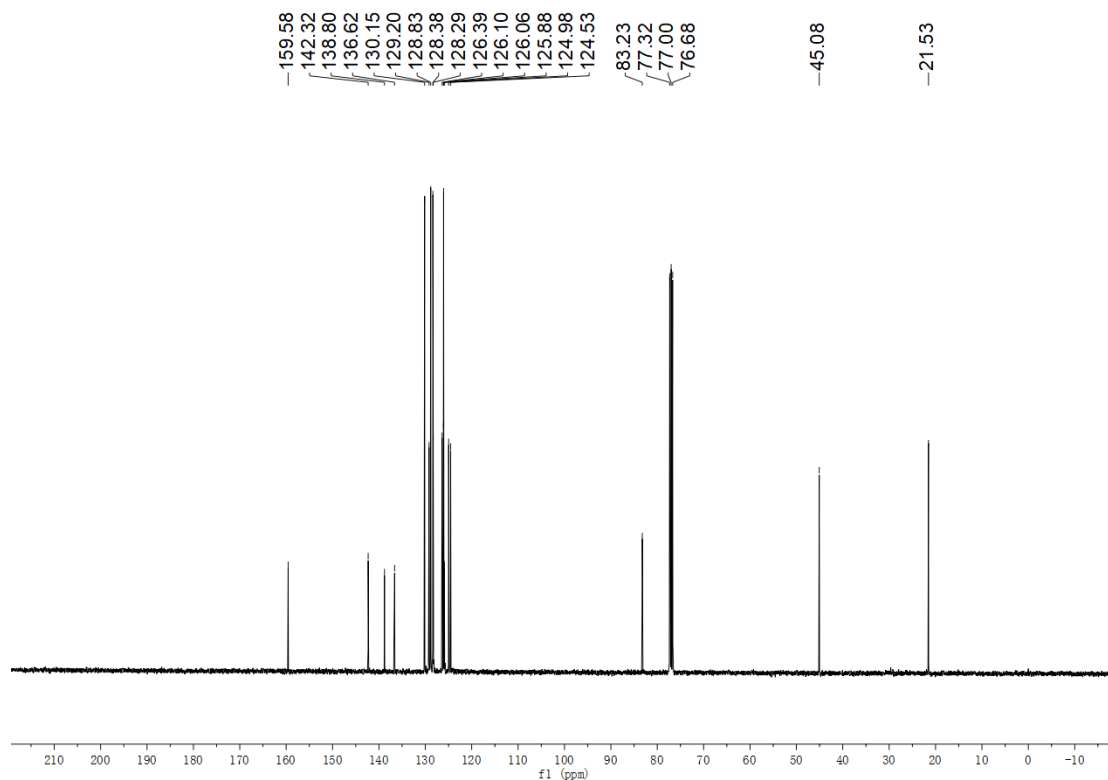

### 4-(((4-fluorophenyl)thio)methyl)-2,4-diphenyl-4H-benzo[d][1,3]oxazine (3ab)

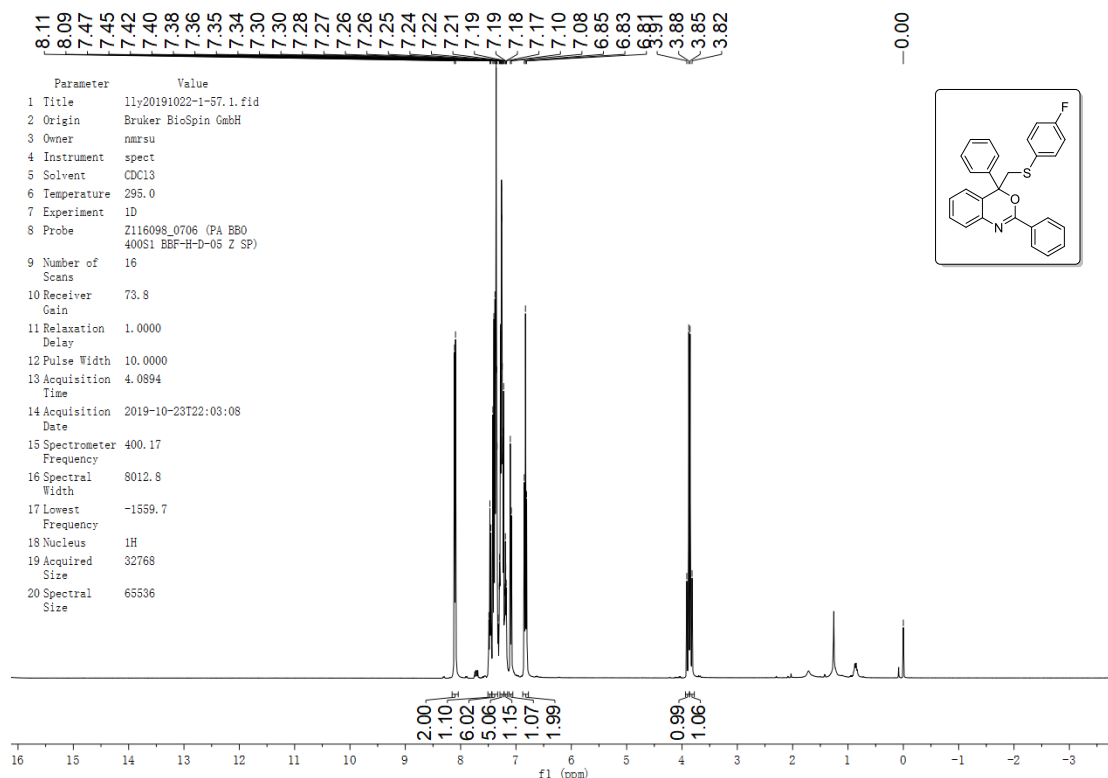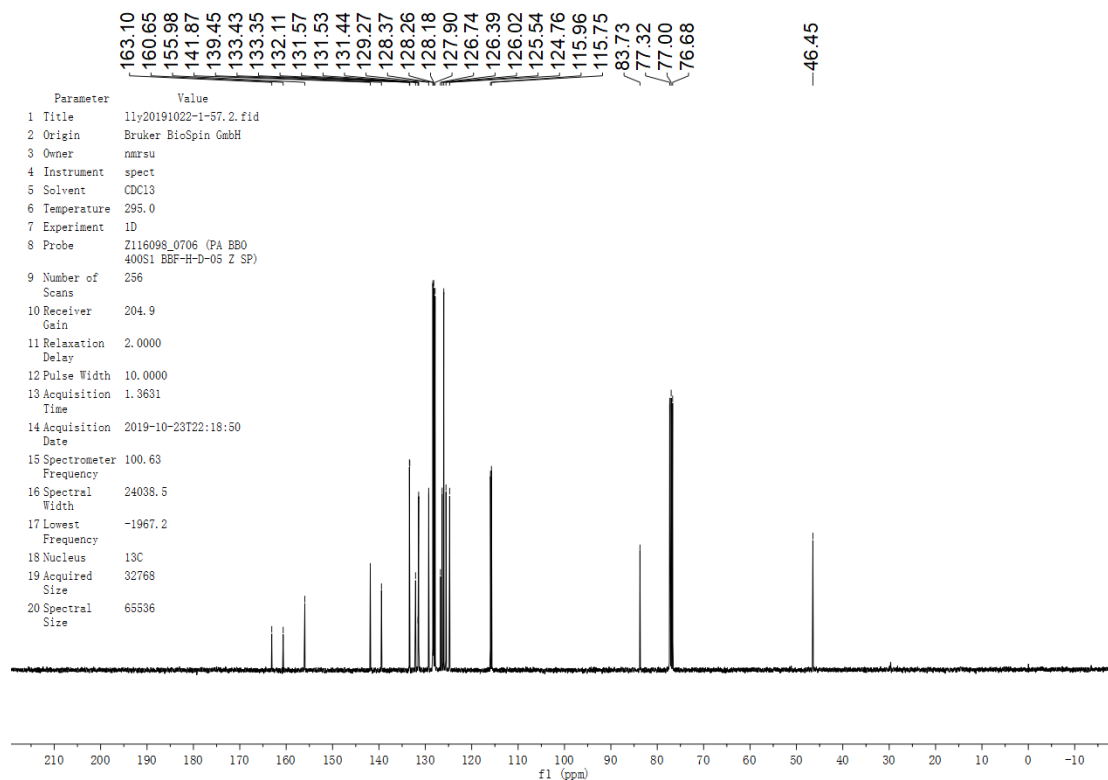

| Parameter                 | Value                                              |
|---------------------------|----------------------------------------------------|
| 1 Title                   | 11y20191022-1-f.2.fid                              |
| 2 Origin                  | Bruker BioSpin GmbH                                |
| 3 Owner                   | nmrsu                                              |
| 4 Instrument              | spect                                              |
| 5 Solvent                 | CDCl3                                              |
| 6 Temperature             | 297.1                                              |
| 7 Experiment              | 1D                                                 |
| 8 Probe                   | 5 mm PABBO BB/<br>19F-1H/ D Z-GRD<br>Z116098/ 0154 |
| 9 Number of Scans         | 16                                                 |
| 10 Receiver Gain          | 207.2                                              |
| 11 Relaxation Delay       | 1.0000                                             |
| 12 Pulse Width            | 14.0000                                            |
| 13 Acquisition Time       | 0.7340                                             |
| 14 Acquisition Date       | 2020-06-17T10:10:00                                |
| 15 Spectrometer Frequency | 376.37                                             |
| 16 Spectral Width         | 89285.7                                            |
| 17 Lowest Frequency       | -82283.1                                           |
| 18 Nucleus                | 19F                                                |
| 19 Acquired Size          | 65536                                              |
| 20 Spectral Size          | 131072                                             |

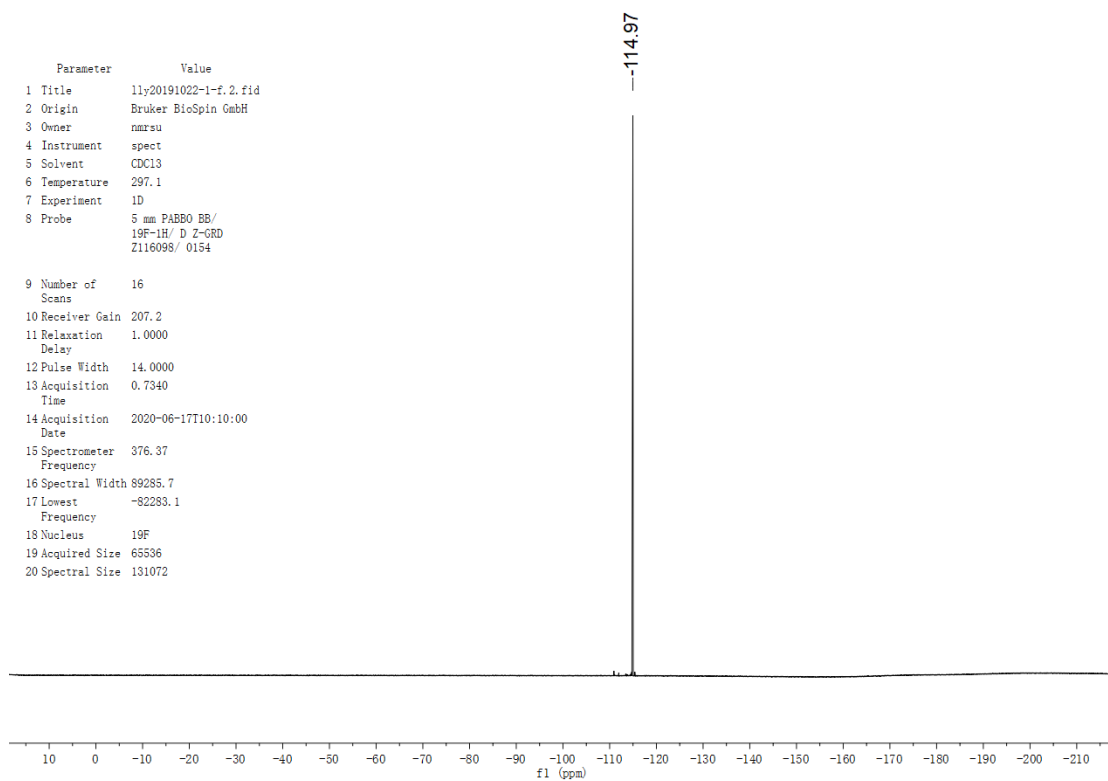



**4-(((4-chlorophenyl)thio)methyl)-2,4-diphenyl-4H-benzo[d][1,3]oxazine (3ac)**

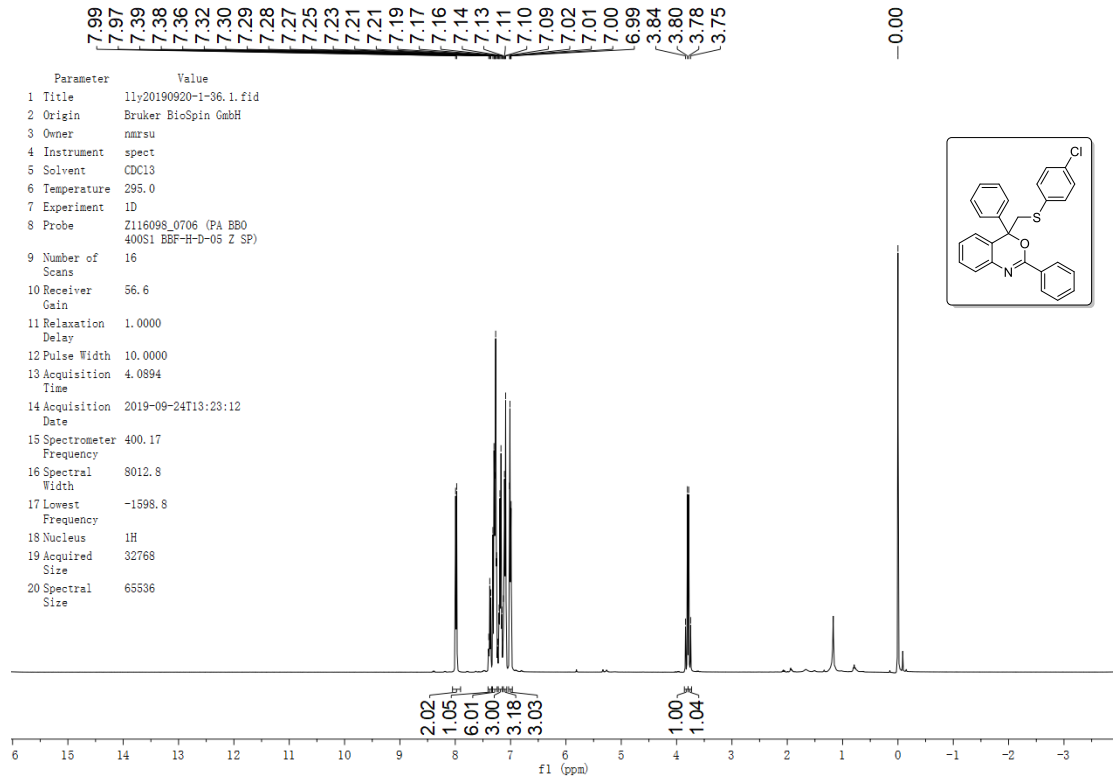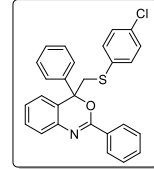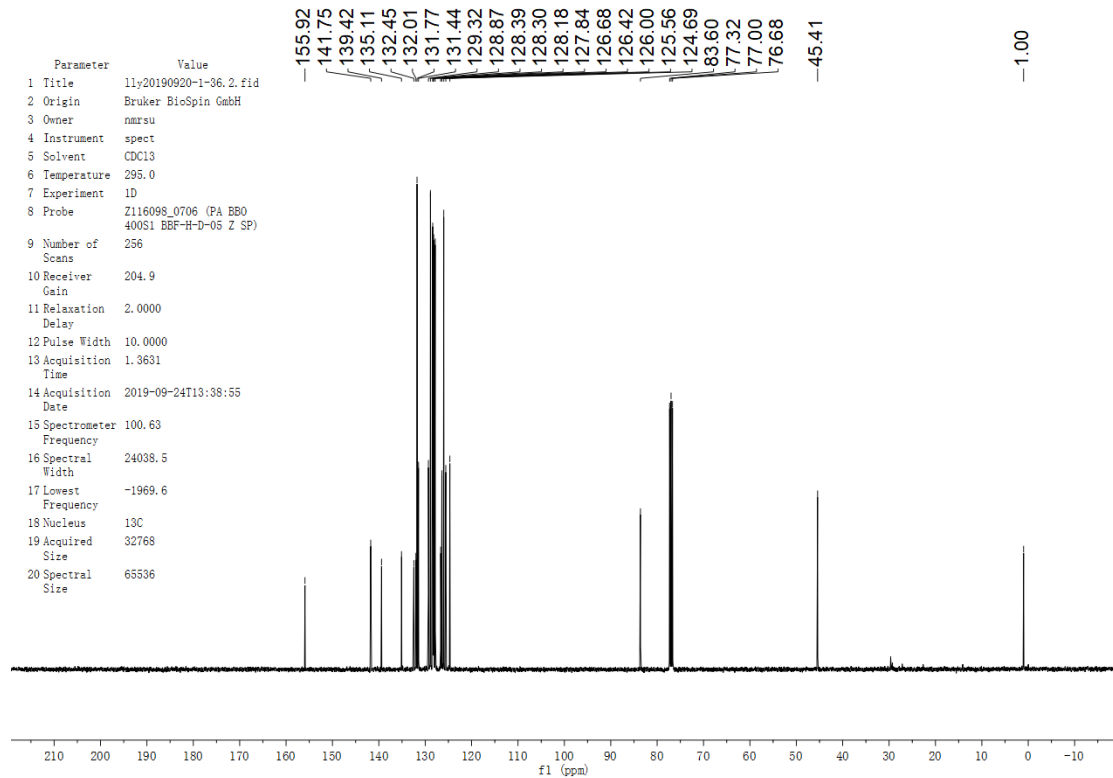

**4-(((4-bromophenyl)thio)methyl)-2,4-diphenyl-4H-benzo[d][1,3]oxazine (3ad)**

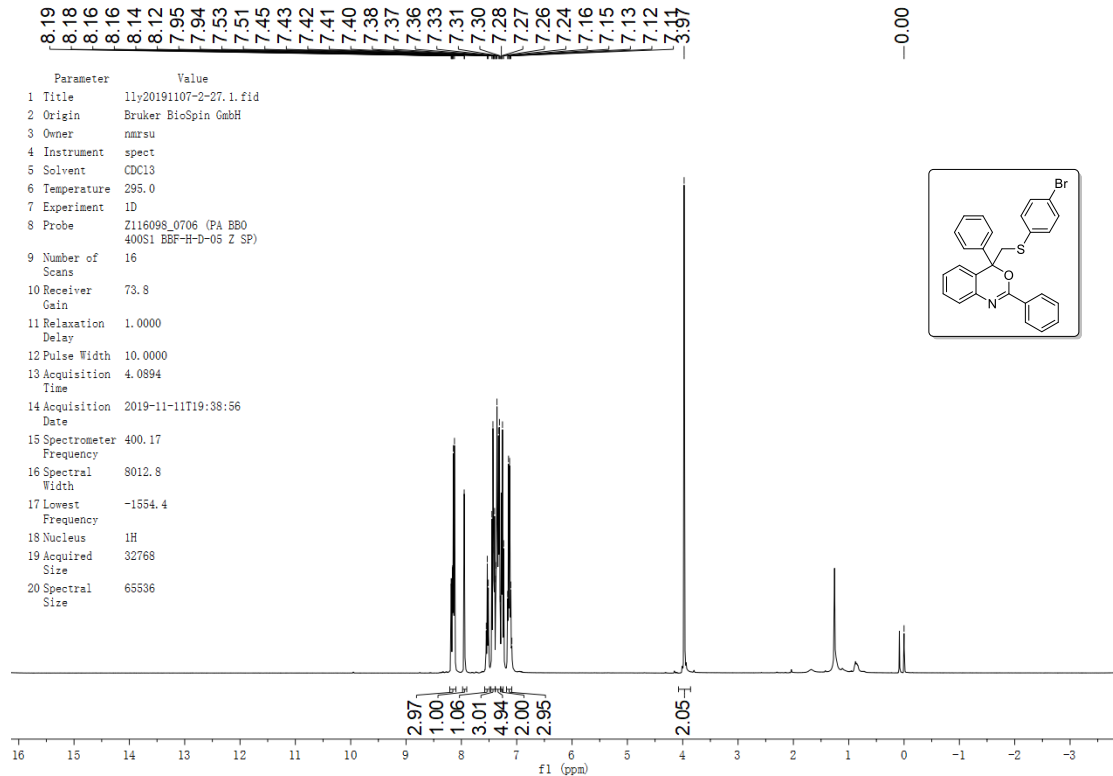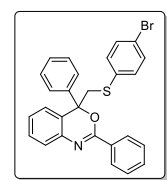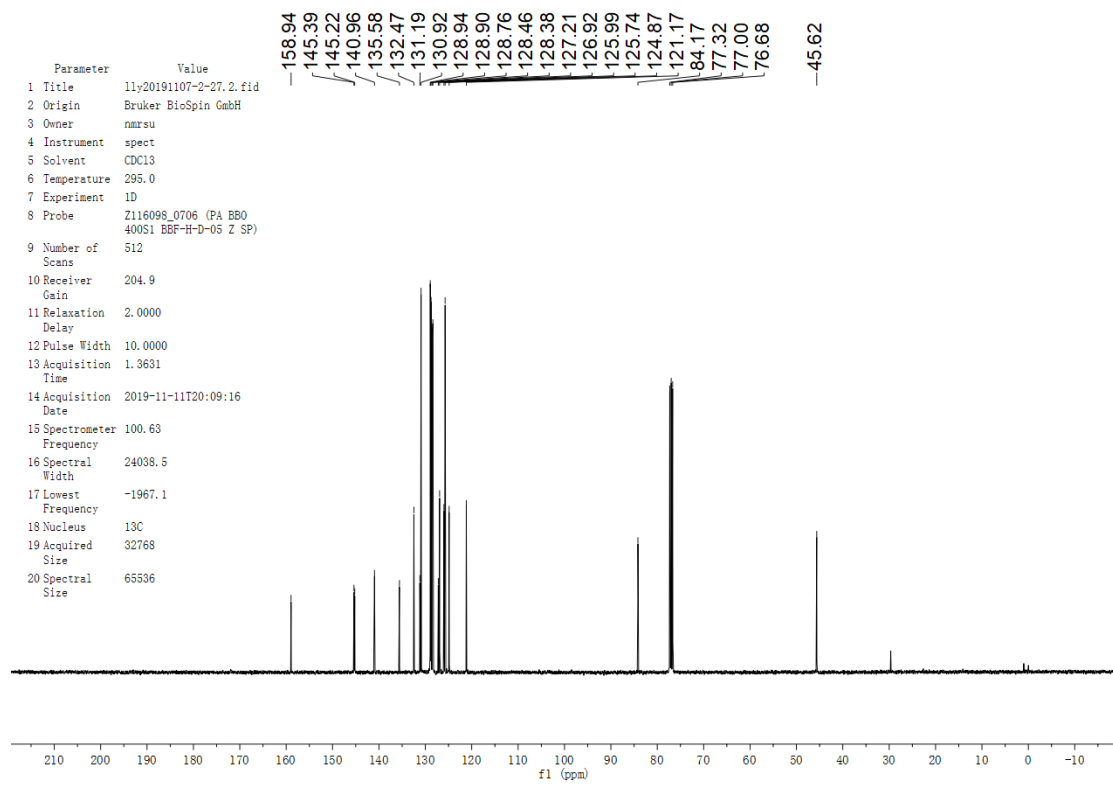

**4-(((4-nitrophenyl)thio)methyl)-2,4-diphenyl-4H-benzo[d][1,3]oxazine (3ae)**

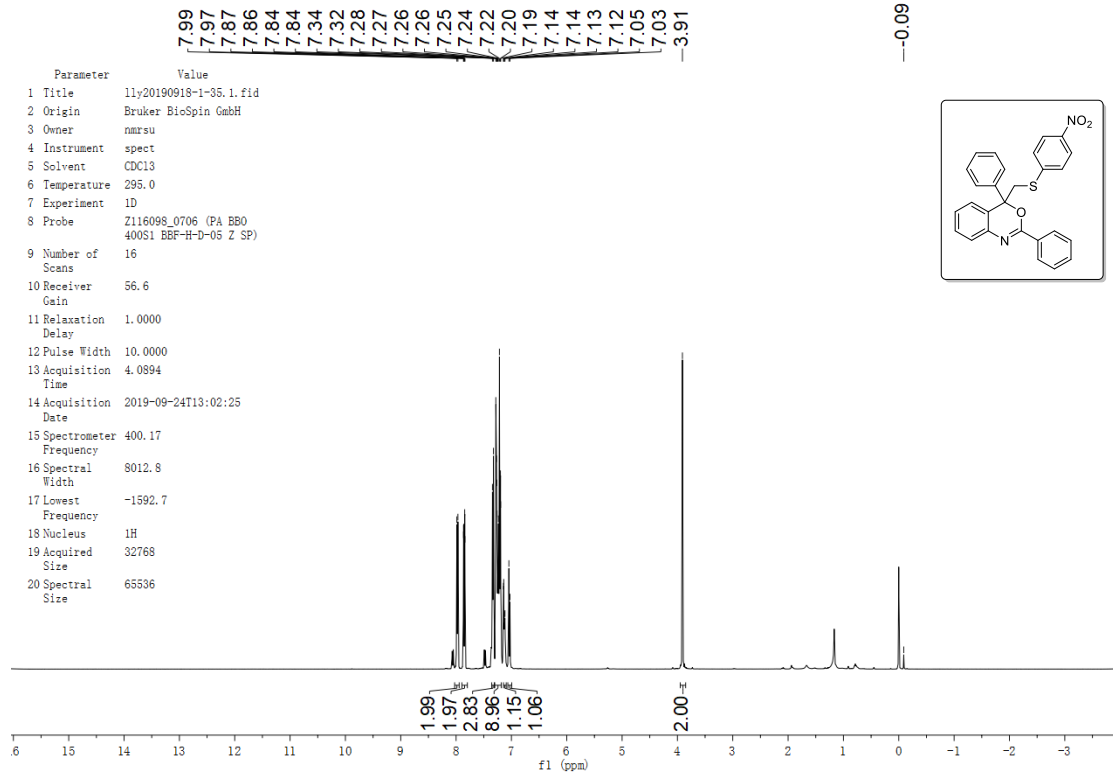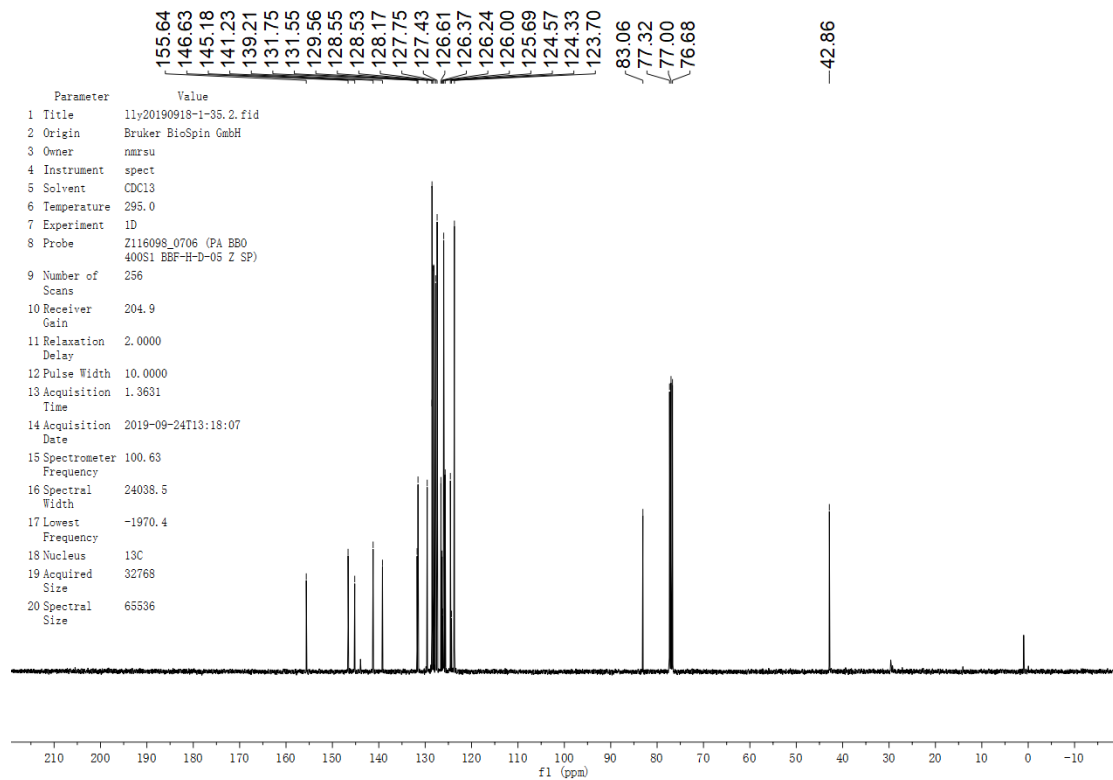

# 4-(((4-methoxyphenyl)thio)methyl)-2,4-diphenyl-4H-benzo[d][1,3]oxazine (3af)

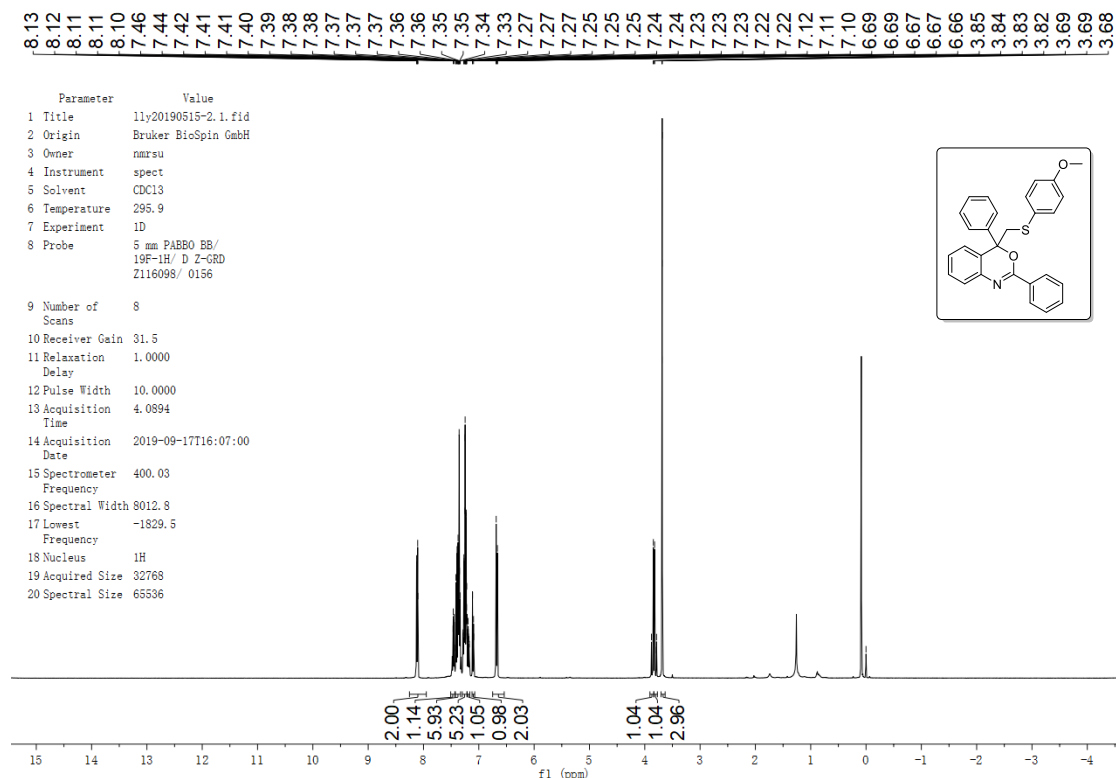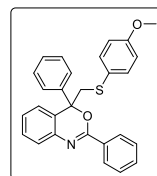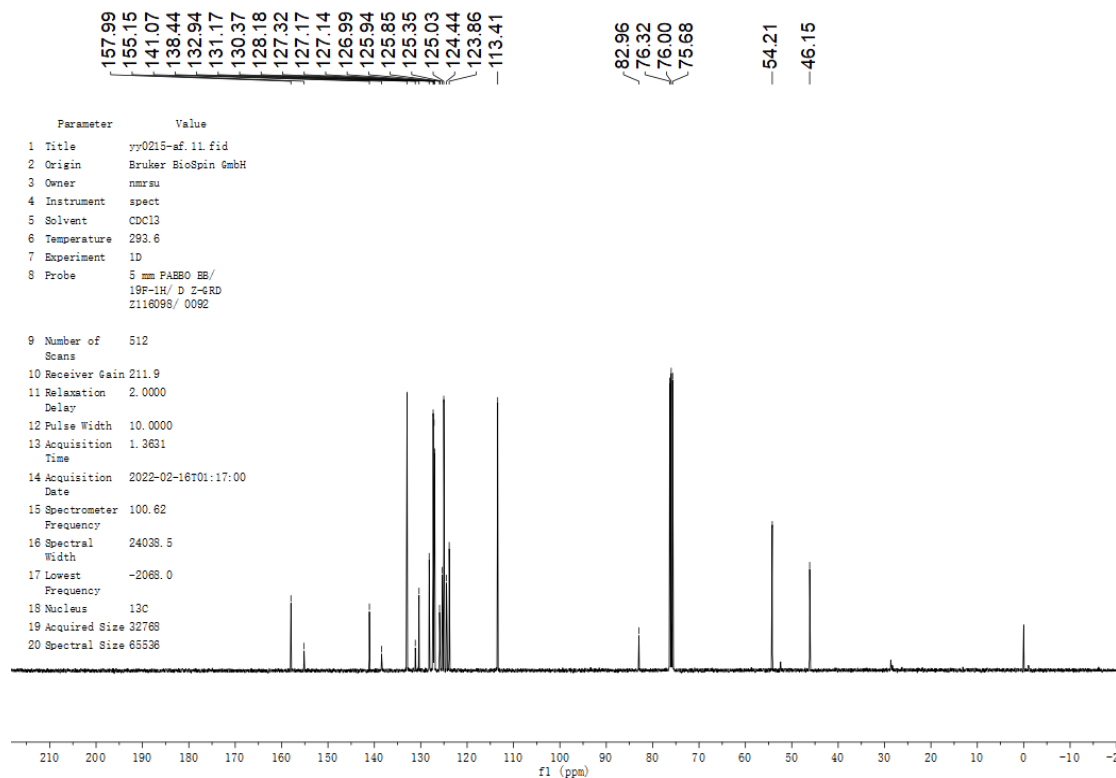

## 2,4-diphenyl-4-((p-tolylthio)methyl)-4H-benzo[d][1,3]oxazine (3ag)

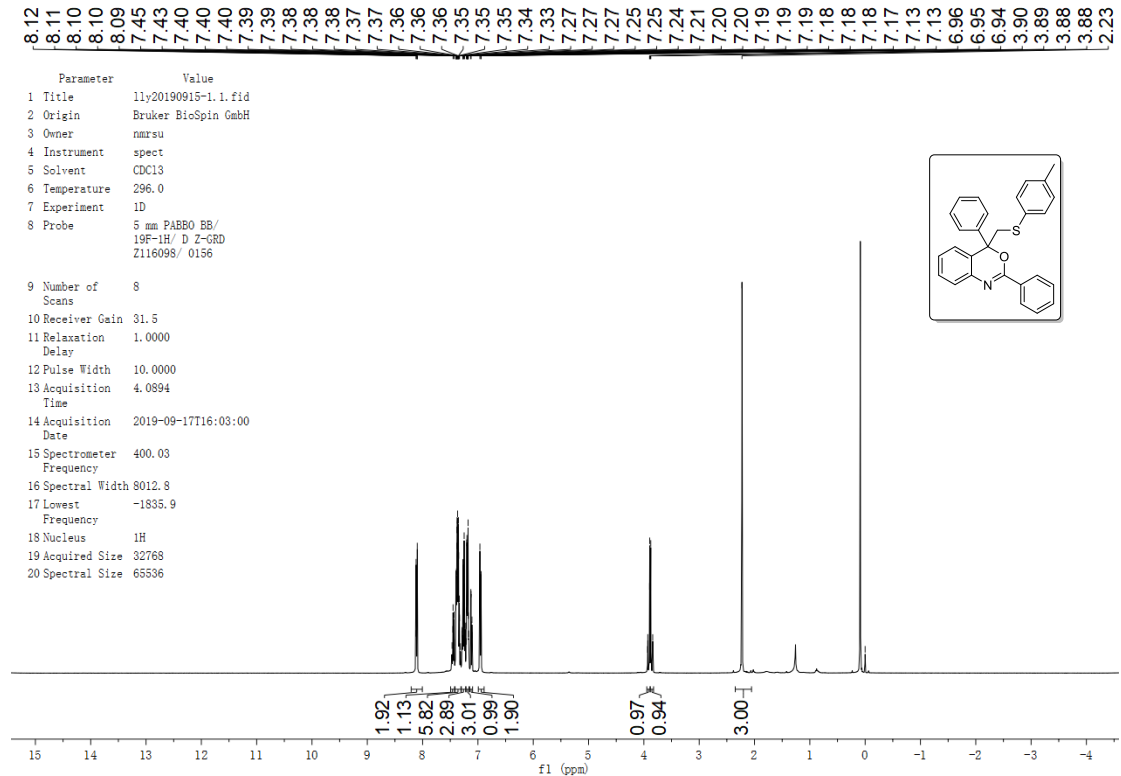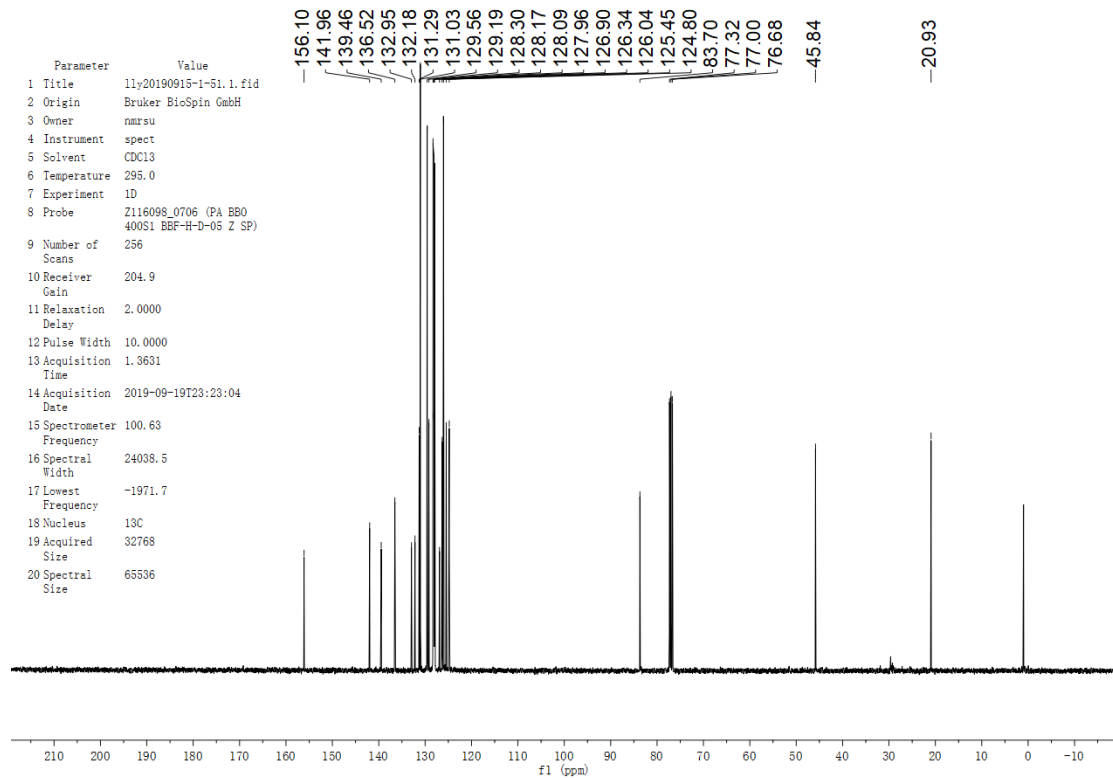

## 2,4-diphenyl-4-((m-tolylthio)methyl)-4H-benzo[d][1,3]oxazine (3ah)

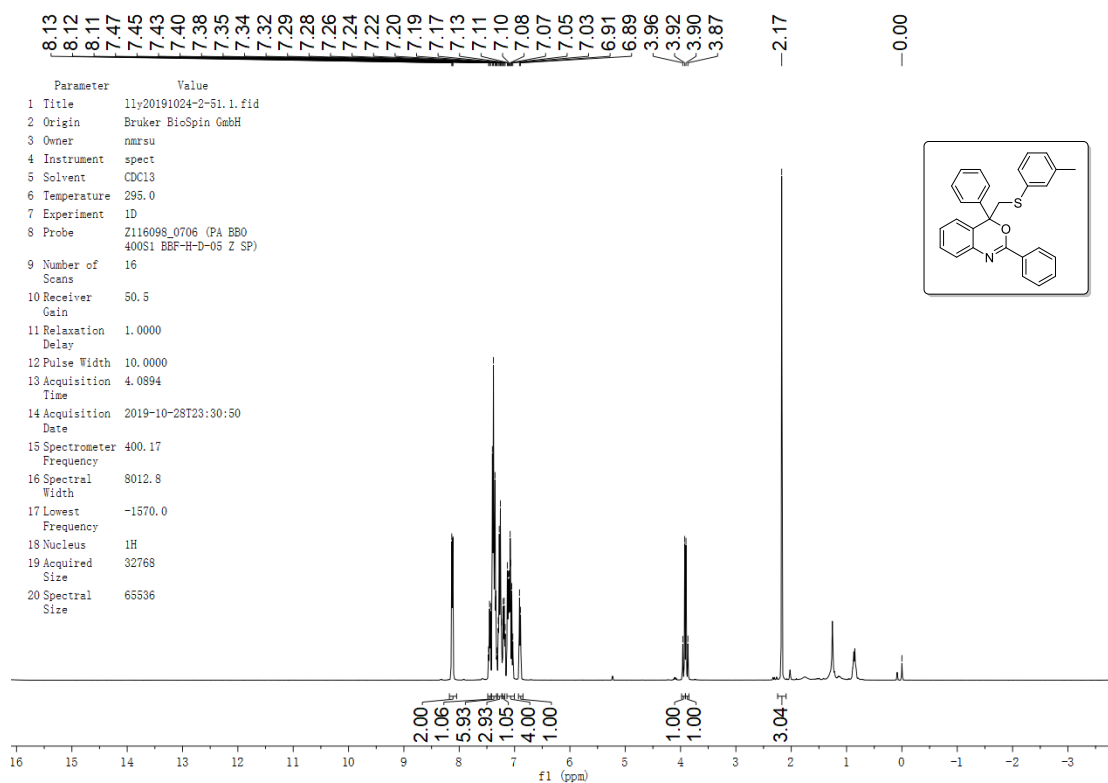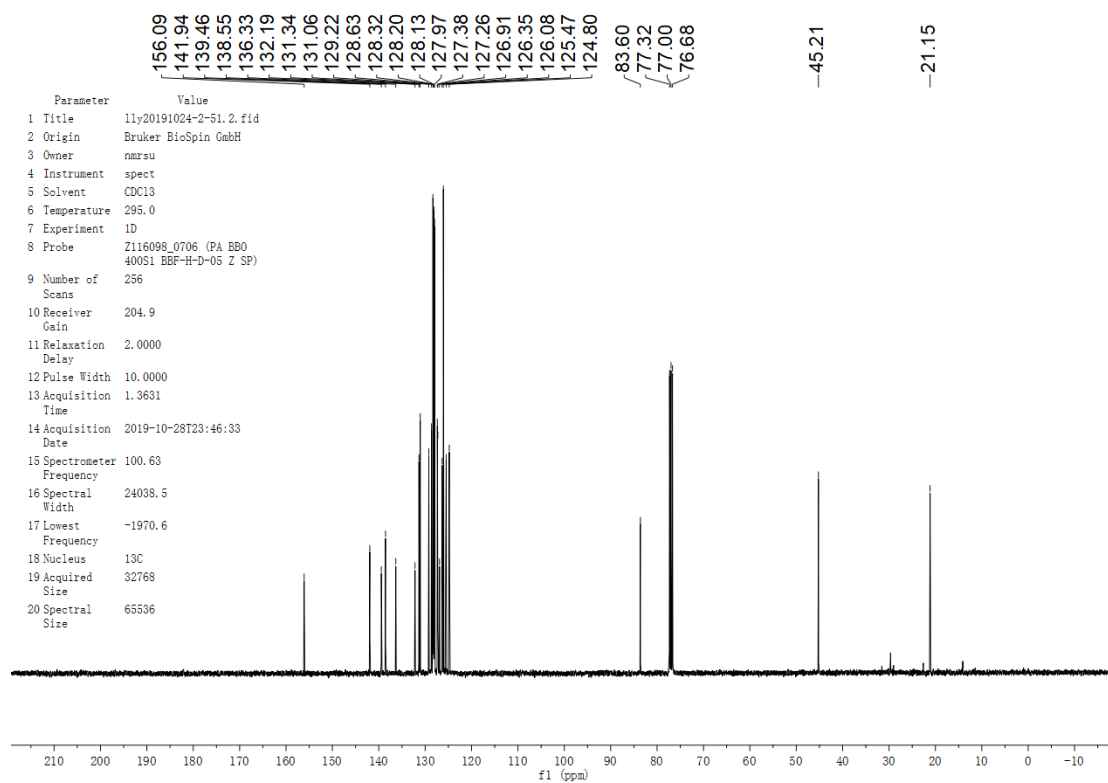

## 2,4-diphenyl-4-((o-tolylthio)methyl)-4H-benzo[d][1,3]oxazine (3ai)

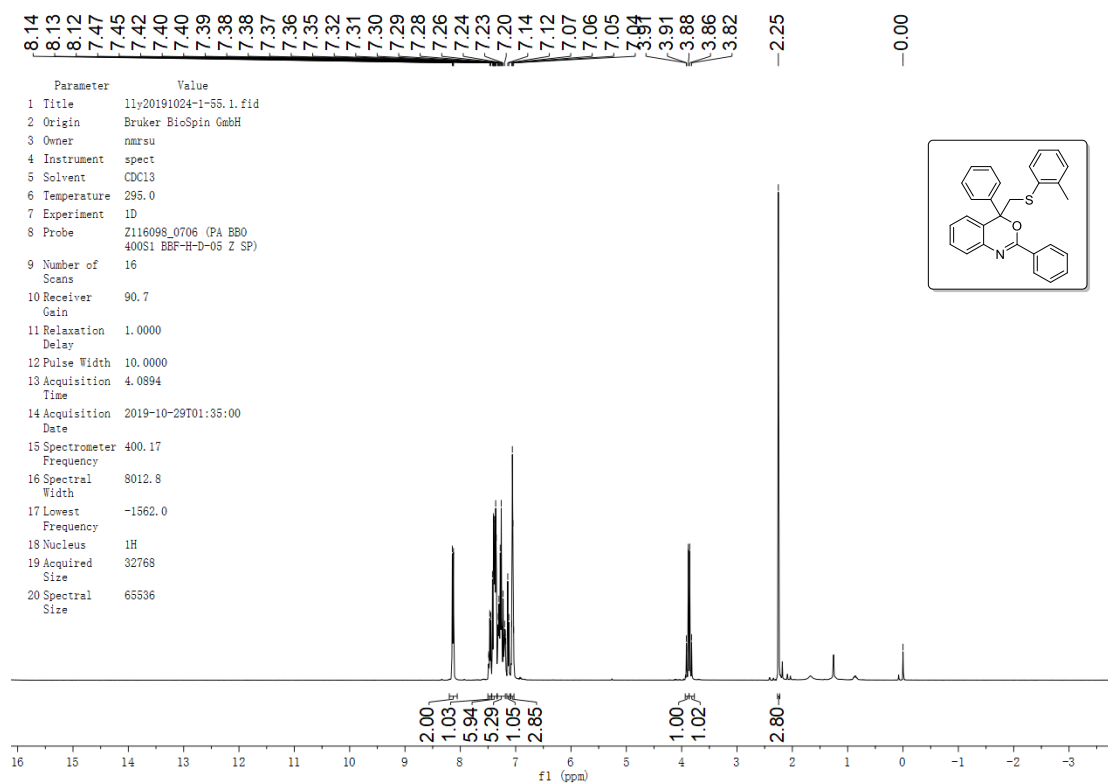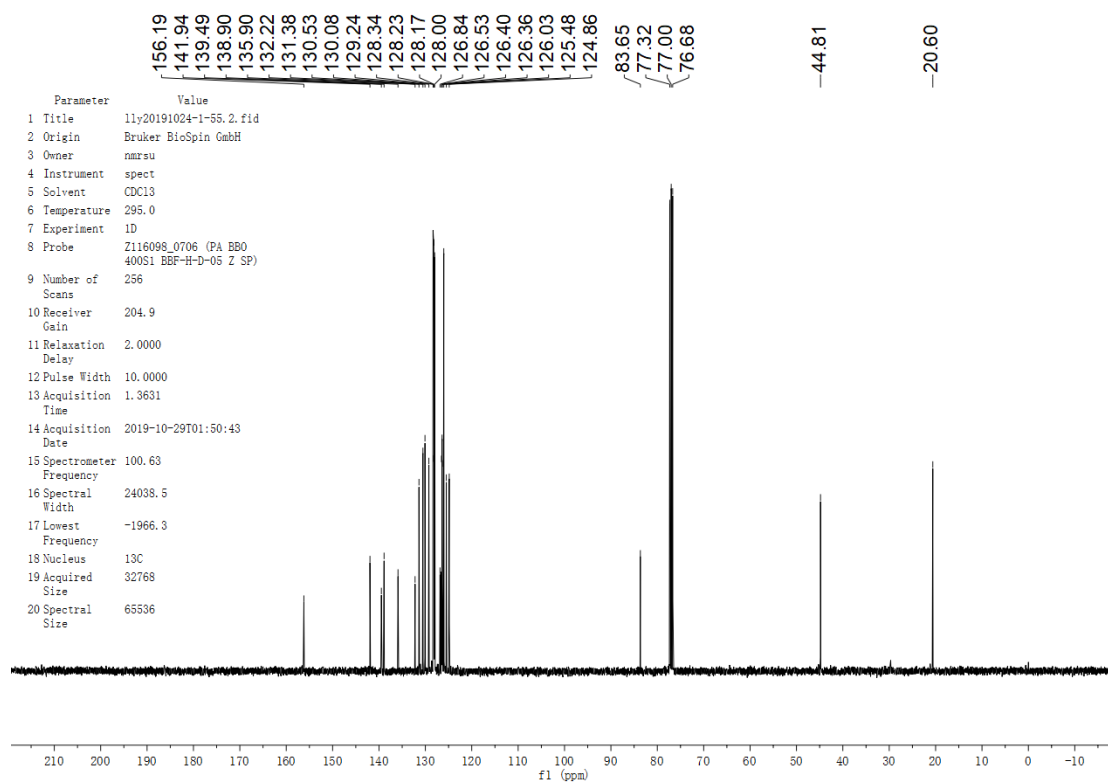

## 2,4-diphenyl-4-((propylthio)methyl)-4H-benzo[d][1,3]oxazine (3ak)

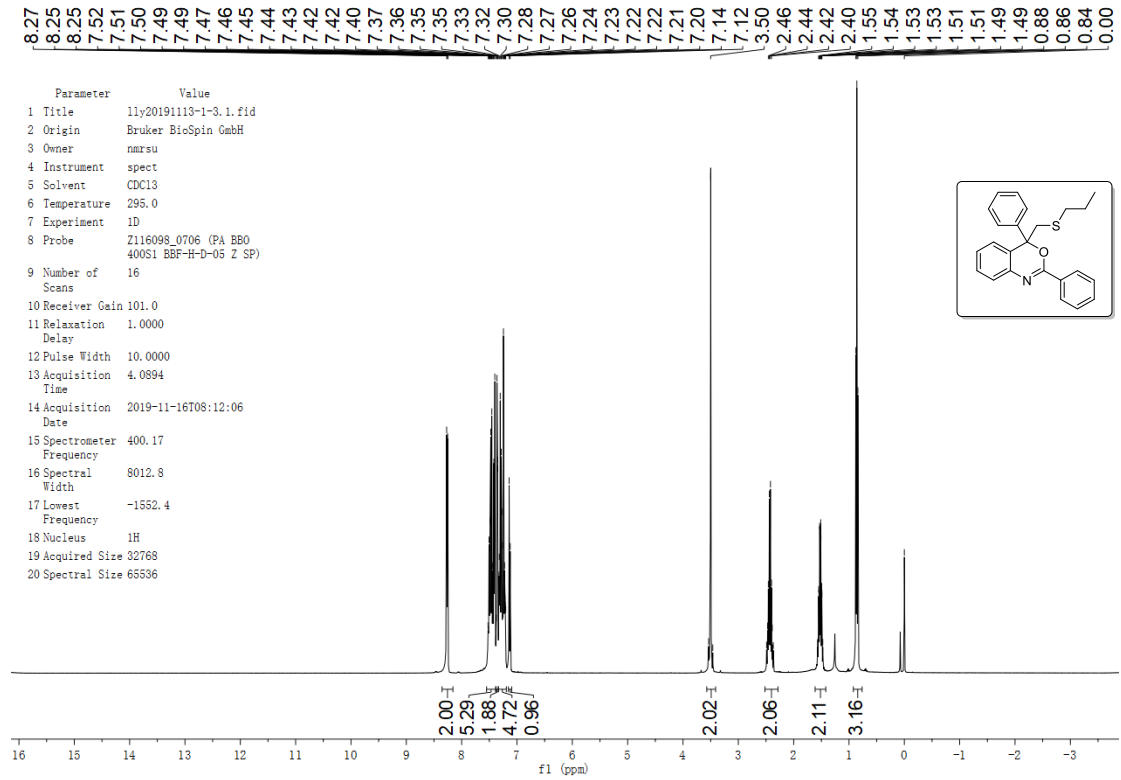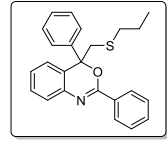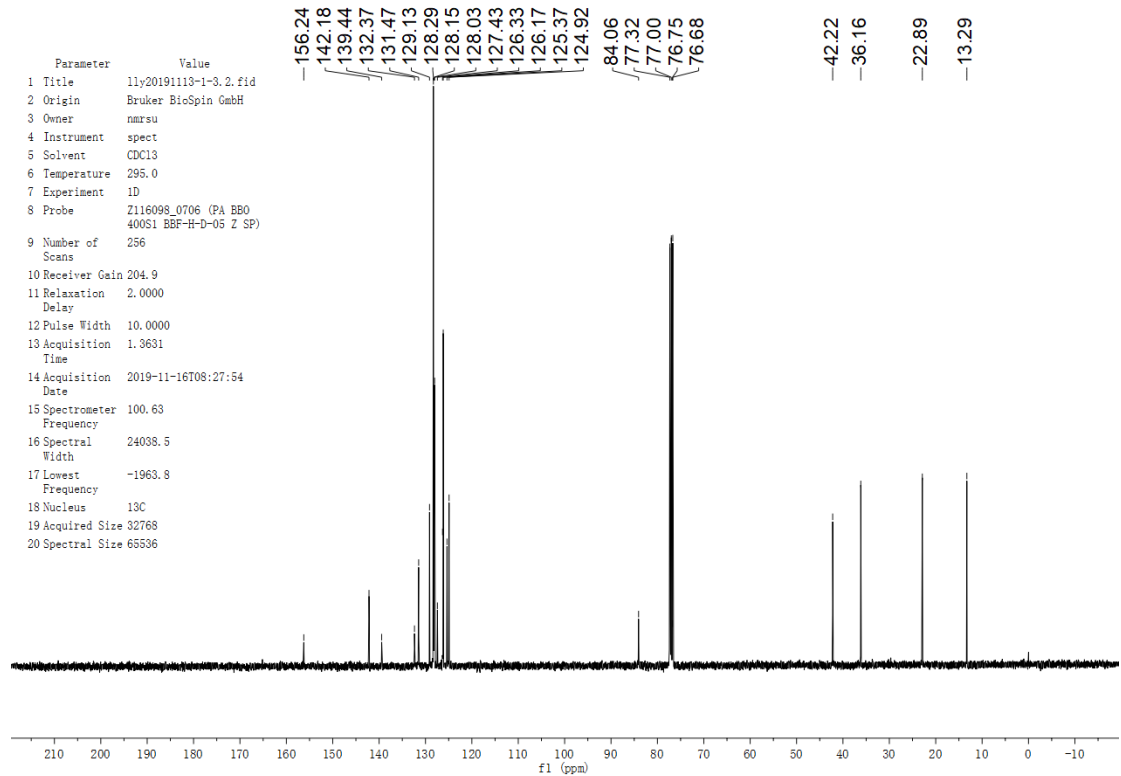



**4-((cyclohexylthio)methyl)-2,4-diphenyl-4H-benzo[d][1,3]oxazine (3a)**

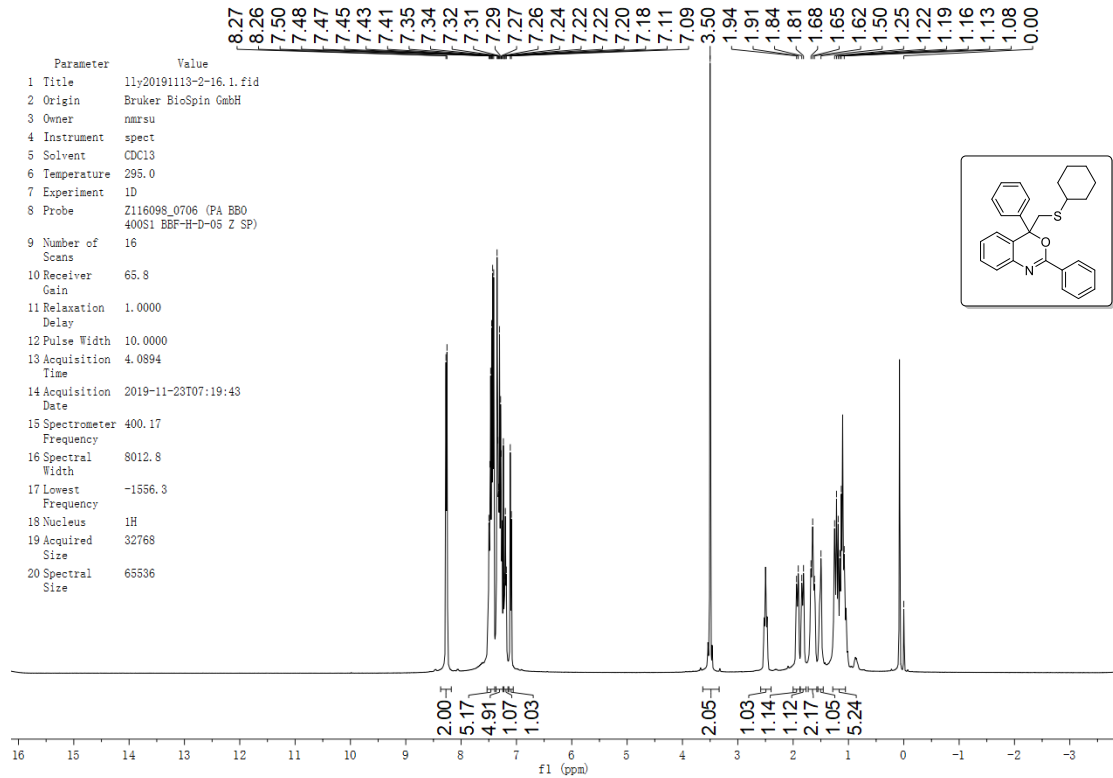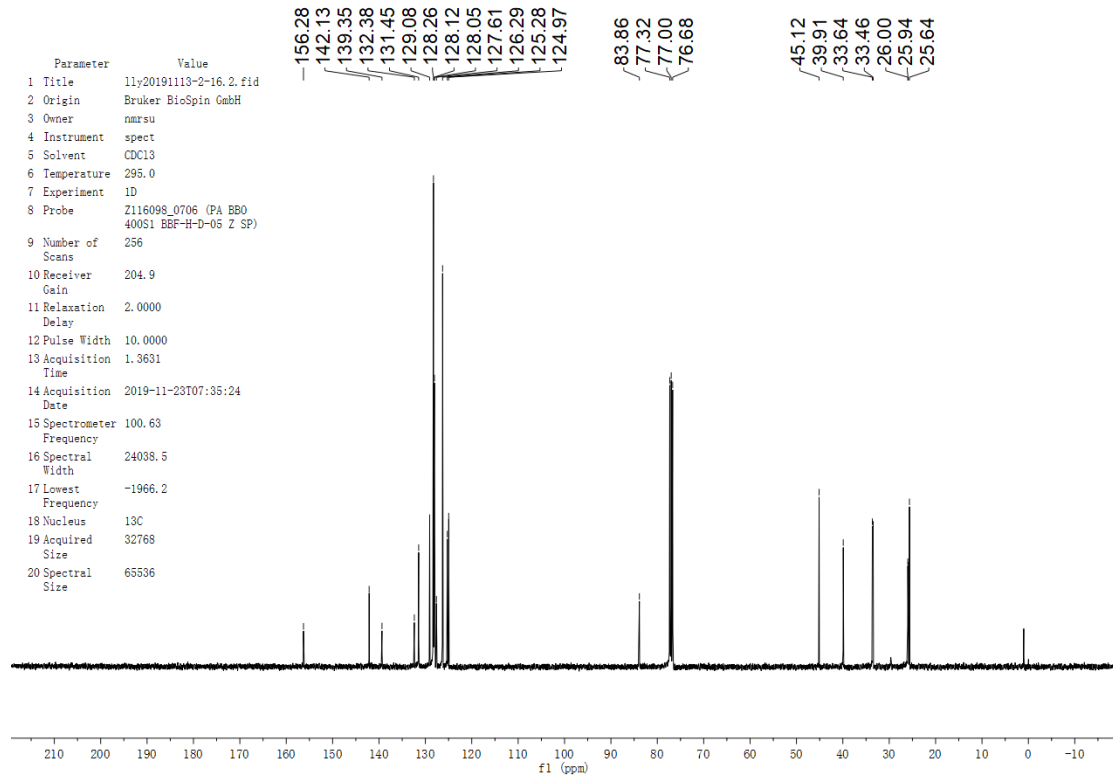

Supplement: d2ra01078j1.pdf [file d2ra01078j1.pdf]
